# Supplementary material for: Exploring maintenance of physical activity behaviour change among people living with and beyond gastrointestinal cancer: a cross-sectional qualitative study and typology
Source: PubMed Central journal article supplement (PMC7597473; doi:10.1136/bmjopen-2020-037136), 2020-10-29
Supplement: bmjopen-2020-037136.draft_revisions.pdf [file bmjopen-2020-037136.draft_revisions.pdf]

# BMJ Open

BMJ Open is committed to open peer review. As part of this commitment we make the peer review history of every article we publish publicly available.

When an article is published we post the peer reviewers' comments and the authors' responses online. We also post the versions of the paper that were used during peer review. These are the versions that the peer review comments apply to.

The versions of the paper that follow are the versions that were submitted during the peer review process. They are not the versions of record or the final published versions. They should not be cited or distributed as the published version of this manuscript.

BMJ Open is an open access journal and the full, final, typeset and author-corrected version of record of the manuscript is available on our site with no access controls, subscription charges or pay-per-view fees (<http://bmjopen.bmj.com>).

If you have any questions on BMJ Open's open peer review process please email [info.bmjopen@bmj.com](mailto:info.bmjopen@bmj.com)

# BMJ Open

## A typology of physical activity maintenance in people living with and beyond cancer

|                               |                                                                                                                                                                                                                                                                                                                                                                                                                                                                                                                                                                                                                                                                                                                                                                                                                                                                                     |
|-------------------------------|-------------------------------------------------------------------------------------------------------------------------------------------------------------------------------------------------------------------------------------------------------------------------------------------------------------------------------------------------------------------------------------------------------------------------------------------------------------------------------------------------------------------------------------------------------------------------------------------------------------------------------------------------------------------------------------------------------------------------------------------------------------------------------------------------------------------------------------------------------------------------------------|
| Journal:                      | <i>BMJ Open</i>                                                                                                                                                                                                                                                                                                                                                                                                                                                                                                                                                                                                                                                                                                                                                                                                                                                                     |
| Manuscript ID                 | bmjopen-2020-037136                                                                                                                                                                                                                                                                                                                                                                                                                                                                                                                                                                                                                                                                                                                                                                                                                                                                 |
| Article Type:                 | Original research                                                                                                                                                                                                                                                                                                                                                                                                                                                                                                                                                                                                                                                                                                                                                                                                                                                                   |
| Date Submitted by the Author: | 20-Jan-2020                                                                                                                                                                                                                                                                                                                                                                                                                                                                                                                                                                                                                                                                                                                                                                                                                                                                         |
| Complete List of Authors:     | Grimmett, Chloe; University of Southampton, Macmillan Survivorship Research Group, School of Health Sciences, Bld 67, Highfield Campus<br>Foster, Claire; University of Southampton, Macmillan Survivorship Research Group, School of Health Sciences, Bld 67, Highfield Campus<br>Bradbury, Katherine; University of Southampton, Centre for Clinical and Community Health Psychology<br>Lally, Philippa; University College London Medical School, ; UCL<br>May, Carl; London School of Hygiene and Tropical Medicine Faculty of Epidemiology and Population Health<br>Myall, Michelle; University of Southampton, NIHR ARC Wessex, School of Health Sciences, Bld 67, Highfield Campus<br>Pinto, Bernadine; University of South Carolina, College of Nursing<br>Corbett, Teresa; University of Southampton, NIHR ARC Wessex, School of Health Sciences, Bld 67, Highfield Campus |
| Keywords:                     | ONCOLOGY, SPORTS MEDICINE, QUALITATIVE RESEARCH                                                                                                                                                                                                                                                                                                                                                                                                                                                                                                                                                                                                                                                                                                                                                                                                                                     |
|                               |                                                                                                                                                                                                                                                                                                                                                                                                                                                                                                                                                                                                                                                                                                                                                                                                                                                                                     |

SCHOLARONE™  
Manuscripts

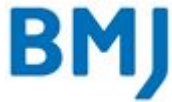

I, the Submitting Author has the right to grant and does grant on behalf of all authors of the Work (as defined in the below author licence), an exclusive licence and/or a non-exclusive licence for contributions from authors who are: i) UK Crown employees; ii) where BMJ has agreed a CC-BY licence shall apply, and/or iii) in accordance with the terms applicable for US Federal Government officers or employees acting as part of their official duties; on a worldwide, perpetual, irrevocable, royalty-free basis to BMJ Publishing Group Ltd ("BMJ") its licensees and where the relevant Journal is co-owned by BMJ to the co-owners of the Journal, to publish the Work in this journal and any other BMJ products and to exploit all rights, as set out in our [licence](#).

The Submitting Author accepts and understands that any supply made under these terms is made by BMJ to the Submitting Author unless you are acting as an employee on behalf of your employer or a postgraduate student of an affiliated institution which is paying any applicable article publishing charge ("APC") for Open Access articles. Where the Submitting Author wishes to make the Work available on an Open Access basis (and intends to pay the relevant APC), the terms of reuse of such Open Access shall be governed by a Creative Commons licence – details of these licences and which [Creative Commons](#) licence will apply to this Work are set out in our licence referred to above.

Other than as permitted in any relevant BMJ Author's Self Archiving Policies, I confirm this Work has not been accepted for publication elsewhere, is not being considered for publication elsewhere and does not duplicate material already published. I confirm all authors consent to publication of this Work and authorise the granting of this licence.

## A typology of physical activity maintenance in people living with and beyond cancer

Chloe Grimmett, Claire Foster, Kat Bradbury, Phillippa Lally, Carl R May, Michelle Myall, Bernardine Pinto, Teresa Corbett

Prof Claire Foster, Macmillan Survivorship Research Group, School of Health Sciences, University of Southampton, Southampton SO17 1BJ, UK

Dr Katherine Bradbury, Centre for Clinical and Community Health Psychology, University of Southampton, Southampton SO17 1BJ, UK

Dr Phillippa Lally, Research Department of Behavioural Science and Health, UCL, Gower Street, London WC1E 6BT, UK

Prof C R May, Faculty of Public Health and Policy, London School of Hygiene and Tropical Medicine, London WC1H 9SH, UK

Dr Michelle Myall, NIHR ARC Wessex, School of Health Sciences, University of Southampton, Southampton SO17 1BJ, UK

Dr Bernardine Pinto, College of Nursing, University of South Carolina, SC 29208, USA

Dr Teresa Corbett, NIHR ARC Wessex, School of Health Sciences, University of Southampton, Southampton SO17 1BJ, UK

**Corresponding author:** Dr Chloe Grimmett, School of Health Sciences, University of Southampton, Southampton SO17 1BJ, UK. Tel +44 (0)2380 597964. Email: [c.grimmett@soton.ac.uk](mailto:c.grimmett@soton.ac.uk)

**Word count:** 4757

**Key words:** physical activity, cancer, maintenance, typology, barriers, facilitators

**Abstract**

Objectives: In the last decade there has been a rapid expansion of physical activity (PA) promotion programmes and interventions targeting people living with and beyond cancer. The impact that these initiatives have on long-term maintenance of PA remains under-researched. This study sought to explore the experiences of participants in order to characterise those who have and have not successfully sustained increases in PA following participation in a PA intervention after a diagnosis of GI cancer, and identify barriers and facilitators of this behaviour.

Design: Cross-sectional qualitative study. Semi-structured interviews explored current and previous PA behaviour and factors that promoted or inhibited regular PA participation. Interviews were audio recorded, transcribed verbatim and analysed using thematic analysis. Themes and sub-themes were identified. Differences between individuals were recognised and a typology of PA engagement developed using Kruger's (2000) four staged process.

Participants: Twenty-seven individuals (N = 15 male, mean age = 66.3 years) with a diagnosis of GI cancer who had participated in one of four interventions designed to encourage PA participation.

Setting: United Kingdom.

Results: Seven themes were identified: disease processes, the role of ageing, emotion and psychological well-being, incorporating PA into everyday life, social interaction, support and self-monitoring and competing demands. A typology with three types describing long-term PA engagement was generated 1) maintained PA, 2) intermittent PA, 3) low activity. Findings indicate that identifying an enjoyable activity that is appropriate to an individual's level of physical functioning and is highly valued is key to supporting long-term PA engagement.

Conclusion: There is a need to move away from one-size fits all interventions to promoting PA through personalised approaches. The typology described here can be used to guide personalised intervention development and support sustained PA engagement.

### Strengths and limitations of this study:

- This qualitative study using in-depth interviews with individuals engaging in varying levels of physical activity provides novel insight into the barriers and facilitators to long-term physical activity engagement after diagnosis and treatment of cancer.
- The typology presented can help inform the design and delivery of personalised physical activity interventions to support long-term behaviour change.
- Findings may be limited because participants were recruited from completed physical activity interventions and therefore do not reflect the views and experiences of individual who were unwilling or unable to take part in such a trial.

### INTRODUCTION

There is robust evidence that physical activity (PA) can provide improvements in physiological and psychosocial outcomes in people living with and beyond cancer (LWBC), including enhanced quality of life, physical function and reductions in cancer-related fatigue[1]. Furthermore, observational data suggest PA may reduce cancer recurrence, death from cancer and other causes in some cancer types. Therefore, cancer survivors potentially stand to benefit considerably from engagement in PA and consequently it is recommended that regular PA be promoted as part of the cancer care pathway[2]. The most recent guidelines from the American College of Sports Medicine suggest those LWBC should avoid inactivity and aim to achieve public health guidelines of 150 minutes per week of aerobic exercise and twice a week resistance exercise. This level of PA can also reduce the risk of developing chronic diseases, delay decline in physical and mental functioning associated with aging, and extend life[3].

1  
2  
3 The majority of cancer survivors do not meet these recommendations, and are less active than those  
4 without a history of cancer[4]. There has been a rapid expansion of PA promotion programmes and  
5 interventions targeting people LWBC to address this imbalance. Evidence suggests on-site  
6 supervised, home-based, web-based, individual and group and peer-support interventions can  
7 successfully increase PA in the short and medium term[5-7]. Furthermore, a recent systematic  
8 review and meta-analysis of long-term PA behaviour reported a moderate impact at least 3 months  
9 post-intervention completion[8]. However, there is wide variation of impact at an individual level  
10 with large standard deviations in self-reported and/or objectively recorded PA. This is elegantly  
11 illustrated by Morey and colleague's trajectory analysis of the RENEW study, a broad-reach  
12 intervention delivered by printed materials and telephone to older adults with a diagnosis of  
13 cancer[9]. The authors report a small proportion (7%) of participants did not engage in any PA at any  
14 point during the study. This is in contrast to 33% who increased PA at the end of the intervention but  
15 declined during the observational follow-up and around 60% who maintained increases in PA during  
16 the intervention and 12-month follow-up period. If interventions are to be developed that  
17 successfully support as many individuals as possible to maintain a physically active lifestyle we need  
18 to understand factors that promote and inhibit this maintenance of PA.

19  
20  
21  
22  
23  
24  
25  
26  
27  
28  
29  
30  
31  
32  
33  
34  
35  
36  
37  
38  
39  
40 Individuals diagnosed with gastrointestinal (GI) cancers, such as colon, rectal, stomach and  
41 oesophageal are a particularly important group to consider. Affecting both men and women, cancers  
42 of the colon and rectum are particularly prevalent in older age which means individuals frequently  
43 present with other comorbidities. Individuals LWB GI cancer may also experience troublesome  
44 symptoms such as stool frequency and urgency, incontinence, fatigue and pain[10] making adoption  
45 and maintenance of PA particularly challenging.

46  
47  
48  
49  
50  
51  
52  
53  
54 A recent mixed methods review investigated barriers, facilitators and preferences for PA among  
55 people LWBC and found that common barriers were treatment-related side effects, lack of time and  
56 fatigue[11]. Facilitators included exercising to gain control over health and feelings of well-being.  
57  
58  
59  
60

1  
2  
3 However, the majority of studies in this review focused on uptake and/or participation in  
4  
5 interventions, with little attention paid to experiences of independent and sustained (or not)  
6  
7 behaviour change post-intervention. Furthermore, only 4 of the 19 studies included individuals with  
8  
9 GI cancer.  
10

11  
12 This paper reports findings from a qualitative study that sought to explore the experiences of  
13  
14 participants in order to characterise those who have and have not successfully sustained increases in  
15  
16 PA following participation in a PA intervention after a diagnosis of GI cancer, and identify factors that  
17  
18 promote and inhibit this behaviour.  
19  
20  
21  
22  
23  
24

## 25 1. METHODS

### 26 2.1 Recruitment and procedure

27  
28  
29 Eligible participants had a previous diagnosis of colorectal, oesophageal or stomach cancer and had  
30  
31 completed a PA programme more than 6 months before participating in the current study.  
32  
33  
34

35  
36 Participants were recruited from four PA promotion programmes in England and Northern Ireland  
37  
38 (see Table 1). The coordinators of the programmes identified eligible participants and sent a letter of  
39  
40 invitation to take part in the current study. Those who were willing were asked to return a reply slip  
41  
42 to the coordinating centre at the University of Southampton.  
43  
44  
45  
46  
47  
48  
49  
50

51 **Table 1: Programmes from which participants were recruited.**

| 52 Project                                                          | 53 Description                                                                                                                                                                                                                                                                                                                               |
|---------------------------------------------------------------------|----------------------------------------------------------------------------------------------------------------------------------------------------------------------------------------------------------------------------------------------------------------------------------------------------------------------------------------------|
| 54 The Advancing Survivor<br>55 Cancer Outcomes Trial<br>56 (ASCOT) | 57 A lifestyle programme for those diagnosed with breast, prostate<br>58 or colorectal cancer. This was a distance-based lifestyle<br>59 intervention, delivered through printed materials and personally<br>60 tailored telephone discussions underpinned by habit theory[28].<br>See published protocol[29]. Identified participants had a |



|                                                                                                               |                                                                                                                                                                                                                                                                         |
|---------------------------------------------------------------------------------------------------------------|-------------------------------------------------------------------------------------------------------------------------------------------------------------------------------------------------------------------------------------------------------------------------|
|                                                                                                               | previous diagnosis of colorectal cancer and had set at least one PA goal during the study.                                                                                                                                                                              |
| Efficacy of an exercise training programme during Concurrent neoadjuvant cancer treatments) trial (ENCOURAGE) | ENCOURAGE participants took part in a structured, supervised hospital-based exercise programme before during and after cancer treatments and prior to surgery.                                                                                                          |
| Active Everyday                                                                                               | A PA referral programme based in Sheffield, UK. Participants received personalised behaviour change support and sign-posting to local PA opportunities[30]. Colorectal cancer only.                                                                                     |
| Macmillan Move More Programme – Northern Ireland                                                              | Participants receive personalised support with one-to-one consultations and advice to increase their activity levels and appropriate sign-posting to local opportunities including group-based exercise programmes for people with LWBC cancer. Colorectal cancer only. |

## 2.2 Ethical statement

Ethical approval was obtained from the Health Research Authority and the University of Southampton Research Ethics committee prior to recruitment and data collection. Participants were provided with information sheets and gave written consent prior to interview.

## 2.3 Procedure

The study was reported according to the Consolidation Criteria for Reporting Qualitative Research (COREQ)[12]. See supplementary file 1.

All interviews were conducted by CG (an experienced qualitative researcher) and audio-recorded (with consent) using an encrypted electronic device. CG is a member of the trial steering committee for the ASCOT study but did not have direct involvement with the delivery of the intervention.

Participants were informed that the current study was independent of the study in which they had previously taken part.

Telephone interviews took place between January and June 2019 and lasted between 40 and 75 minutes. Semi-structured Interviews were carried out using a topic guide comprising open questions designed to explore and capture data on factors that influenced the maintenance (or not) of PA following participation in a PA programme (see supplementary file 2).

1  
2  
3 Participants were also asked to complete a short demographics questionnaire to capture, age, sex,  
4 cancer type, marital status, ethnicity, level of education, home and car ownership, occupation and  
5 caring responsibilities.  
6  
7  
8  
9

## 10 **2.4 Analysis**

11  
12 A thematic analysis was conducted as described by Braun & Clarke[13]. This was a recursive process  
13 moving back and forth between stages with continuous interpretation of the data from the outset.  
14  
15

16  
17  
18 1) Transcription: interviews were audio-recorded using an encrypted audio recorder and transcribed  
19 verbatim by an independent, experienced transcriber. Transcripts were checked against audio  
20 recorders, were anonymised and pseudonyms attributed. 2) Familiarisation with data: transcripts  
21 and field notes were read and re-read with analytical notes, thoughts and impressions recorded  
22 freehand. 3) Generating initial codes: transcripts were read line by line and initial codes applied. TC,  
23 CG and CRM coded a sample of transcripts (n=3). A data analysis workshop was then held to discuss  
24 codes and their labels. TC and CG coded a further 3 transcripts followed by a second analysis  
25 workshop before CG coded the remaining interviews. 4) Searching for themes: codes were then  
26 sorted into themes and sub-themes by CG and an initial thematic map generated and 5) Reviewing,  
27 defining and naming themes: themes were data driven, identified at a semantic level within the  
28 realist paradigm. A further analysis workshop was held between TC, CG and CRM to discuss the  
29 themes, sub-themes and the relationships between them, while also interrogating the data between  
30 cases. Refinements were made and CG revisited the transcripts to determine if themes and sub-  
31 themes were an accurate representation of the data. NVIVO was used to manage the data.  
32  
33  
34  
35  
36  
37  
38  
39  
40  
41  
42  
43  
44  
45  
46  
47  
48  
49

50 Analysis indicated that groups of cases (individuals) existed and it was possible to develop a  
51 typology. A typology provides a useful way of describing groups of individuals with different clusters  
52 of behaviours, values or attitudes. Kluge's[14] four stage process of construction of empirically  
53 grounded types was followed. Stage 1; 'development of relevant analysing dimensions' – was  
54 achieved through the thematic analysis described above; here 'dimensions' are themes and sub-  
55  
56  
57  
58  
59  
60

1  
2  
3 themes. Stage 2; 'grouping of cases and analysis of empirical regularities' – individual cases were  
4 compared and contrasted and their position within the themes and sub-themes determined. Stage  
5  
6  
7  
8 3; 'analysis of meaningful relations and type construction' – relationships between the themes of the  
9  
10 groups were analysed and heterogeneity between groups checked, i.e. sufficient variation in data  
11  
12 existed between the groups. Stage 4; 'characterisation of the constructed types' – through an  
13  
14 iterative process, including discussion with the wider research team, the final typology of PA  
15  
16 maintenance was characterised.

17  
18  
19 Critical reflection was practiced throughout, and peer de-briefing was used to explore researcher  
20  
21 bias.  
22

## 23 24 **2.5 Patient and public involvement**

25  
26  
27 Patients and carers were involved in the conception of this study which forms part of a National  
28  
29 Institute for Health Research post-doctoral fellowship. They reviewed the letters of invitation,  
30  
31 patient information sheets and consent forms and suggested amendments. Patients and carers will  
32  
33 also be involved in the dissemination of results, supporting the writing of a participant report and  
34  
35 using their networks to disseminate results to wider patient communities.  
36  
37  
38

## 39 **3. RESULTS**

### 40 41 42 **3.1 Characteristics of respondents**

43  
44  
45 Letters of invitation were sent to 124 individuals who had previously completed one of the four  
46  
47 aforementioned programmes. A total of 48 reply slips were returned; yielding a response rate of  
48  
49 39%. Three individuals were found to be ineligible (no diagnosis of GI cancer) and seven could not be  
50  
51 contacted. To ensure variation in the sample purposive sampling of the 38 viable responses was  
52  
53 employed considering age, sex, socio-economic status and level of PA. Twenty-seven individuals  
54  
55 were selected for interview.  
56  
57  
58  
59  
60

Participant demographics are described in Table 2. Just over half of the sample were male with an average age of 66.3 years, all were white British. The majority (89%) were married and owned their own home (93%), 56% were retired.

**Table 2: Demographic characteristics**

|                                                          |                    |
|----------------------------------------------------------|--------------------|
| <b>N = 27</b>                                            |                    |
| Male                                                     | 15 (56%)           |
| Age (mean/range)                                         | 66.3 years (41-79) |
| Cancer type                                              |                    |
| Colorectal                                               | 23 (85%)           |
| Oesophageal                                              | 3 (11%)            |
| Stomach                                                  | 1 (4%)             |
| Previous programme (N)                                   |                    |
| ASCOT                                                    | 15 (56%)           |
| ENCOURAGE                                                | 4 (15%)            |
| Active Everyday                                          | 2 (7%)             |
| Move More Northern Ireland                               | 6 (22%)            |
| Ethnicity                                                |                    |
| White European                                           | 27 (100%)          |
| Marital Status                                           |                    |
| Married                                                  | 24 (89%)           |
| Living with partner                                      | 1 (4%)             |
| Single                                                   | 1 (4%)             |
| Divorced/separated                                       | 1 (4%)             |
| Employment                                               |                    |
| Full time                                                | 5 (18.5%)          |
| Part time                                                | 5 (18.5%)          |
| Retired                                                  | 15 (56%)           |
| Volunteering                                             | 2 (7%)             |
| Accommodation                                            |                    |
| Owner occupied                                           | 25 (93%)           |
| Rented housing                                           | 2 (7%)             |
| Caring responsibilities for adult                        | 4 (15%)            |
| Education                                                |                    |
| More than secondary education, e.g. undergraduate degree | 12 (44%)           |

### 3.2 Thematic analysis results

Seven themes were identified, each is set out below with exemplar quotes presented in Table 3.

Disease processes:

1  
2  
3 Participants described the processes of disease, both cancer and comorbidities, and the role this  
4  
5 played in relation to their PA participation.  
6  
7

8 *Disease limits activities.*  
9

10  
11 For some, late effects of cancer treatment inhibited engagement in certain activities. Limitations as a  
12  
13 result of a stoma were described, for example, avoiding activities that involved bending, or  
14  
15 swimming due to issues of body esteem and concerns about bag leakage. Some also experienced  
16  
17 bowel urgency and described avoiding certain activities where toilet facilities were unavailable, as  
18  
19 well as adapting activities due to concerns about leaks or accidents.  
20  
21

22  
23 Other comorbidities/ill health impacted PA participation, including arthritic conditions and back  
24  
25 problems. Chronic obstructive pulmonary disease, asthma and breathlessness were reported to  
26  
27 restrict walking outside, particularly in cold weather. More acute periods of illness or injury were  
28  
29 also described including cough/colds and muscle/joint strains which interrupted PA participation.  
30  
31

32 *PA to improve comorbidities/late effects of cancer.*  
33  
34

35  
36 In contrast, PA was also described as essential in maintaining good health and well-being, avoiding  
37  
38 illness and physical deterioration and this was a key motivating factor for ongoing participation.  
39

40 Participants also recalled the role of PA in alleviating late effects of cancer treatment, for example,  
41  
42  
43  
44  
45  
46  
47  
48  
49  
50  
51  
52  
53  
54  
55  
56  
57  
58  
59  
60

Table 3: Themes, sub-themes and accompanying quotes

| Theme                                | Sub-theme                                          | Quote                                                                                                                                                                                                                                                                                                                                                                                                                                                                                                                                                                                                                                                                                                                                                                                                                                                                                                                      |
|--------------------------------------|----------------------------------------------------|----------------------------------------------------------------------------------------------------------------------------------------------------------------------------------------------------------------------------------------------------------------------------------------------------------------------------------------------------------------------------------------------------------------------------------------------------------------------------------------------------------------------------------------------------------------------------------------------------------------------------------------------------------------------------------------------------------------------------------------------------------------------------------------------------------------------------------------------------------------------------------------------------------------------------|
| Disease processes                    |                                                    |                                                                                                                                                                                                                                                                                                                                                                                                                                                                                                                                                                                                                                                                                                                                                                                                                                                                                                                            |
|                                      | Disease limits activities                          | <p><i>"I used to go swimming but, I don't want to go swimming now because, I don't want to be in changing rooms where I've suddenly got to change the bag and the bag's wet and all--- because, I have a--- a hernia -- I don't want to be wearing swimming costumes with a kind of lump there, you know, a bag lump and a body lump".</i> Female, ASCOT</p> <p><i>I ought to get more active. I mean, me sister's offered me to. She said: "oh, yeah", you know: "I--- I go swimming every Tuesday, come with me". But, I can't think of anything more frightening than if I was taken short in a [swimming pool]... Female, Active Everyday</i></p> <p><i>I used to have a treadmill up to about six months ago and, I was on that most days. Every third day at least. But my balance isn't very good because I had a trapped spinal cord....I half regret getting rid of that... Female, Active Everyday</i></p>       |
|                                      | PA to improve comorbidities/late effects of cancer | <i>After I'd, you know, got into the--- the gym after the exercise very quickly, my condition was transformed beyond all recognition. You know, and that--- that was the motivation for keeping it up because I saw what it did for me and, I felt much better. My mobility was much improved and the pain levels had disappeared. I mean, I was on constant pain relief. I was taking Naproxen and Co-codamol. Both. Sort of three or four times a day. Once I'd started into a gym, I was taking none.</i> Male, Move More                                                                                                                                                                                                                                                                                                                                                                                               |
| The role of ageing                   |                                                    |                                                                                                                                                                                                                                                                                                                                                                                                                                                                                                                                                                                                                                                                                                                                                                                                                                                                                                                            |
|                                      | Age inhibiting PA                                  | <i>I still do me walks but, I don't do nothing like play any--- any sport or anything. (laughing) It's a bit much at sixty-nine, I think, you know.</i> Male, ASCOT                                                                                                                                                                                                                                                                                                                                                                                                                                                                                                                                                                                                                                                                                                                                                        |
|                                      | PA to combat ageing                                | <p><i>If you're fit and healthy obviously it helps, I should think. And, you're not--- you're not sitting around and becoming a burden to everyone else. So, this is obviously what we both want to avoid. So, yeah, that's--- that's probably the reason behind it [engaging in regular PA] and a fulfilling life, I suppose, and not being a--- a burden on anybody for as long as possible (laughing). Up to one-hundred-and-ten at least (laughter).</i> Male, ASCOT</p> <p><i>When I look at my father-in-law he's--- he's--- muscle waste. He's got no strength anywhere. Obviously, arthritis doesn't help. But, I want to make sure I've got the fitness and ability to be able to do more than him when--- as I go--- go through my older ages. So, that's the one that really sort of kicked in with me and that's why I do cycling and I've got quite strong legs from the running as well.</i> Male, ASCOT</p> |
| Emotion and psychological well-being |                                                    |                                                                                                                                                                                                                                                                                                                                                                                                                                                                                                                                                                                                                                                                                                                                                                                                                                                                                                                            |
|                                      | Psychological well-being                           | <p><i>"It takes--- you know, you're--- you're not thinking about that ache, that pain and what's going to happen in the future"</i> Male, ENCOURAGE</p> <p><i>"But, you know, if--- I think, it's kind of--- it gives you a bit more power, doesn't it? --- your power's been taken away from you in that treatment time but--- and then you want it back. So, you think, so, I'm taking this back."</i> Female, ASCOT</p>                                                                                                                                                                                                                                                                                                                                                                                                                                                                                                 |
|                                      | Low mood and motivation                            | <p><b>INT: So, going back to you using the exercise bike. Can you pinpoint what it was that stopped you doing that?</b></p> <p><b>RESP: ....I got to a stage and I'd think: "why am I bothering?". I think--- I'm getting to a bit of a--- down in the dumps stage. I think: "why am I bothering?". I'm seventy--- seventy-something. I'm seventy-six or whatever. And why should I bother? You know, because I've not got much longer to life. I think, I went through a stage like that.</b> Female, ASCOT</p>                                                                                                                                                                                                                                                                                                                                                                                                           |

|                                     |                       |                                                                                                                                                                                                                                                                                                                                                                                                                                                                                                                                                                                                                                                                                                                                                                                                                                                                                                                                                                                                                                                    |
|-------------------------------------|-----------------------|----------------------------------------------------------------------------------------------------------------------------------------------------------------------------------------------------------------------------------------------------------------------------------------------------------------------------------------------------------------------------------------------------------------------------------------------------------------------------------------------------------------------------------------------------------------------------------------------------------------------------------------------------------------------------------------------------------------------------------------------------------------------------------------------------------------------------------------------------------------------------------------------------------------------------------------------------------------------------------------------------------------------------------------------------|
|                                     |                       | <i>You go for a walk around the block and once you've been around the block once, you're bored with it. So, then you drive out somewhere and have a walk around and then you run out of places to drive up to and you just can't be bothered. Male, ASCOT</i>                                                                                                                                                                                                                                                                                                                                                                                                                                                                                                                                                                                                                                                                                                                                                                                      |
| Incorporating PA into everyday life |                       |                                                                                                                                                                                                                                                                                                                                                                                                                                                                                                                                                                                                                                                                                                                                                                                                                                                                                                                                                                                                                                                    |
|                                     | Incidental activities | <i>I'm pretty active anyway. I mean, I don't--- I don't like sitting about too much. I always find something to do. Male, ASCOT</i>                                                                                                                                                                                                                                                                                                                                                                                                                                                                                                                                                                                                                                                                                                                                                                                                                                                                                                                |
|                                     | Planned activities    | <i>"Yeah. Yeah. They [Nordic walking sessions] were sacrosanct. You know, they're in the diary. They're--- well, we have a calendar on our desk and my walks are all written in there." Female, ENCOURAGE</i>                                                                                                                                                                                                                                                                                                                                                                                                                                                                                                                                                                                                                                                                                                                                                                                                                                      |
| Social interaction                  |                       |                                                                                                                                                                                                                                                                                                                                                                                                                                                                                                                                                                                                                                                                                                                                                                                                                                                                                                                                                                                                                                                    |
|                                     | Avoiding isolation    | <i>INT: And so, it sounds like you get down to that session on a Tuesday as often as you can. What is it about that that keeps you going back week after week?<br/>RESP: I think, it's--- it's the company. Like, as a--- as a pensioner now, I wouldn't--- I wouldn't have much contact with other people other than the family. But it's--- it's the contact. It's getting out and--- and meeting the people which would be the driving force behind it. And as well as that, I enjoy the exercises. Male, Move More</i>                                                                                                                                                                                                                                                                                                                                                                                                                                                                                                                         |
|                                     | Friendship            | <i>Let's put it this way. When we walk our mouths work just as hard as our legs (laughter) so. And--- and you--- so, you can--- you tend to--- you know, you walk in pairs usually just because on tracks it'll often--- that will be, you know, the--- determined by the woods of the track. So, walking two-by-two is the usual and--- and you switch around. You know, that's the nice thing. You'll--- you'll be in different groups and you just happen to link up with somebody and you'll--- you'll have a good old chat as you go along. So, that's the social side bit which is lovely. Female, ENCOURAGE.</i>                                                                                                                                                                                                                                                                                                                                                                                                                            |
| Support and self-monitoring.        |                       | <i>Practice nurses with my GP that--- those sort of people lectured me for years about doing a bit more physical activity but they're not offering me anything.<br/><br/>We (Active Everyday trainer) talked about whether or not--- you know, even when I was younger, I would have played any sport or done anything like that. We--- we had a general conversation and that's--- that as far as I know is a big part of their role. Is to fit people in with things that they feel you'd be capable of doing because if you weren't capable of doing it you're not going to stick at it. Female, Move More<br/><br/><b>INT: And so, you talked about buying a Fitbit. How do you find that impacts on what you're doing?</b><br/><b>RESP: Well, it's great because--- you know, say I'd got to about mid-afternoon, we're not doing anything and I've only done five thousand steps, I know it's time for a walk. You know, that sort of thing. So, no, I use it as a guide and as a--- as a recorder really as well. Female, Move More</b></i> |
| Competing demands                   |                       | <i>And then--- then we had--- because my husband's an only child, my mother-in-law's got dementia and we were having to look after her and, you know, we had all the worry after--- and after she died, clearing the house. So, it's all sort of fell by the wayside, my exercise regime, really which is a shame. But, I was--- so, I would say for two years, I wasn't sort of doing what I had been doing before when the trial was on. But, I'm trying to gradually get back now. Female, ASCOT<br/><br/><i>So, me cycling, I do every Wednesday, Thursday and Friday and that would be cycling over to pick the grandchildren up. Take them home from school. Look after them for a little while. And then bring them--- then come home myself on my bike rather than jump in the car. Male, ASCOT</i></i>                                                                                                                                                                                                                                    |

1  
2  
3 exercising daily to improve gut mobility and bowel habit. PA was also reported as important to  
4 manage other conditions such as Type II diabetes, avoiding weight gain/promoting weight loss and  
5  
6 alleviating joint stiffness caused by arthritic conditions. For one participant, engaging in regular PA  
7  
8 revolutionised the way he managed chronic back pain (see Table 3).  
9  
10  
11  
12  
13  
14

#### 15 The role of ageing

16  
17 Factors related to ageing were frequently referenced in relation to PA participation.  
18  
19  
20  
21

#### 22 *Ageing perceived as inhibiting PA.*

23  
24 In some cases, advancing age was cited as a barrier to engaging in PA. Modification to activities were  
25 described such as using the bus rather than walking, as well as a process of 'slowing down', which in  
26  
27 some cases was associated with retirement. Some perceived that more structured exercise was not  
28  
29 appropriate for older adults.  
30  
31  
32  
33  
34

#### 35 *PA to combat consequences of ageing.*

36  
37 In contrast participation in PA was also reported to be important to preserve fitness and mobility  
38 and slow the physical decline associated with ageing. It was felt that regular exercise helped to  
39  
40 ensure a future where the individual can engage in activities they enjoy and honour commitments to  
41  
42 family and loved ones for as long as possible. Maintaining independence and avoiding burdening  
43  
44 others was also important to some participants. Comparisons were also made to older relatives who  
45  
46 they had witnessed decline in health and a desire to avoid such reductions in mobility and  
47  
48 independence were expressed.  
49  
50  
51  
52  
53  
54  
55

#### 56 Emotion and psychological well-being

57  
58  
59  
60



1  
2  
3 The association between PA and psychological well-being and emotion was commonly described, both  
4  
5 in a facilitative and deleterious way.  
6  
7  
8  
9

10 *Psychological well-being.*

11  
12 Participants who engaged regularly in PA frequently described enjoying the activities as well as  
13  
14 feeling a positive impact on psychological well-being. In some instances, PA also acted as a  
15  
16 distraction from concerns about their health and alleviated anxieties. Others spoke of feeling  
17  
18 empowered by taking exercise, using it as a vehicle to take control over their health following their  
19  
20 cancer diagnosis and treatment.  
21  
22  
23  
24  
25

26 *Low mood, low motivation and lack of enjoyment.*

27  
28  
29 For others feelings of low mood accompanied apathy and impacted on motivation leading to a  
30  
31 reduction in activity levels. Boredom was also expressed with some participants struggling to find  
32  
33 ways to increase their activity level in a manner that interested them and they enjoyed.  
34  
35  
36  
37  
38

39 *Incorporating PA into everyday life*

40  
41 Participants described a variety of ways in which they incorporated PA into their lives.  
42  
43

44 *Incidental activities.*

45  
46  
47 Typically, individuals who participated in little or no structured exercise described a desire to avoid  
48  
49 long periods of sitting. Participants recalled engaging in incidental activities such as domestic chores  
50  
51 and gardening as a means of staying active.  
52  
53

54 *Planned activities.*

55  
56  
57 For some, engagement was structured, organised and part of their routine, such as attending regular  
58  
59 exercise classes or active commuting. Participants expressed commitment to these activities and for  
60

1  
2  
3 some engagement was a priority. Others describe periods of increased PA engagement, for example  
4  
5 during the PA programme or prompted by other factors such as a desire to lose weight, which  
6  
7 subsequently reduced or stopped. Some participants describe how they re-engaged in activities  
8  
9 weeks, months or even years later.  
10  
11  
12  
13  
14

#### 15 16 Social interaction

17  
18 Engagement in PA provided an important opportunity to socialise.  
19

#### 20 21 *Avoiding isolation.*

22  
23  
24 For some individuals living alone and/or who were retired, attending exercise classes provided an  
25  
26 opportunity to meet with others and socialise, reducing feelings of isolation.  
27  
28

29  
30 *Friendship:* Others talked about how participation in PA presented opportunities to develop  
31  
32 meaningful and long-lasting friendships with those they exercised with. For those participants  
33  
34 engaging in regular PA was an opportunity to spend time with friends and acted as a motivation to  
35  
36 continued engagement.  
37  
38  
39  
40  
41

#### 42 Support and self-monitoring

43  
44  
45 For some participants continued engagement in PA was facilitated by personalised support. This was  
46  
47 described by individuals who had previously engaged in regular exercise prior to cancer diagnosis, as  
48  
49 well as those who were novices. The one-to-one specialised support provided during involvement in  
50  
51 a PA promotion programme helped individuals find activities they enjoyed and were appropriate for  
52  
53 them, enabling continued participation. For example, one participant described how a practice nurse  
54  
55 'lectured' her about taking more exercise with little effect. However, following a consultation with  
56  
57  
58  
59  
60

1  
2  
3 the Active Everyday practitioner, she was able to find an activity that suited her needs, and which  
4  
5 she had engaged in weekly for more than 2 years. See Table 3 for quotes.  
6  
7  
8  
9

10 Self-monitoring techniques were important for some. The use of technology to monitor activity,  
11  
12 particularly steps per day, was described as useful. Participants in the ASCOT trial were asked to  
13  
14 wear a pedometer at the beginning of the study. Some reported that they were surprised at how  
15  
16 few steps there were doing at baseline, and this provided motivation for change. Some continued to  
17  
18 use a device to measure their steps, setting a goal, such as walking 10,000 steps a day and regularly  
19  
20 self-monitoring their behaviour.  
21  
22

23  
24 Further, despite ensuring no advice/recommendations to increase activity were made during the  
25  
26 interviews some described their participation in the current study as acting as a prompt to consider  
27  
28 re-engaging with PA.  
29  
30  
31  
32

### 33 Competing demands

34  
35 Responsibilities such as caring for family members, family commitments and work schedules made  
36  
37 consistent and continued engagement in PA challenging for some. Others were able to use these  
38  
39 commitments as an opportunity to increase their activity levels. For example, playing with  
40  
41 grandchildren and active commuting.  
42  
43  
44  
45  
46  
47

## 48 **4. DISCUSSION**

49  
50  
51 This study provides a novel insight into the experiences of sustaining long-term PA behaviour change  
52  
53 following participation in a PA promotion programme among people LWBC. Seven key themes were  
54  
55 identified, presenting key factors that promote or inhibit regular participation in PA; disease  
56  
57  
58  
59  
60

1  
2  
3 processes, impact of ageing, emotions and psychological well-being, incorporating PA into everyday  
4 life, social interaction, competing demands support and self-monitoring.  
5  
6  
7

8 From these findings describing experiences, barriers and facilitators to long-term PA engagement it  
9 was possible to generate a typology consisting of three multidimensional types “maintained PA”,  
10 “intermittent PA” and “low activity”. This typology, informed by the themes identified, characterises  
11 the varied experiences of our sample helping to expand our understanding of factors that influence  
12 an individual’s success, or not, of incorporating regular PA into their everyday lives (see Table 4 for  
13 characteristics by type and accompanying vignettes).  
14  
15  
16  
17  
18  
19  
20  
21

22 The first type is “*Maintained PA*” (see Figure 1.1). Participants described themselves as routinely  
23 active, most often engaging in structured moderate and/or vigorous PA at regular times/days.  
24 Examples include attending the gym, Nordic walking and group exercise classes. Some had  
25 participated in regular PA at other periods of life and the PA intervention supported them to re-  
26 engage with these activities. Others established new routines following participation. The defining  
27 features of this group include finding enjoyment and pleasure in regular PA which is planned and  
28 prioritised. Physical and psychological benefits of regular PA in preserving health, mobility and  
29 independence were described and highly valued. Interruptions to activity tended to be brief and  
30 resuming activity was not problematic or effortful. PA as a means of socialisation was important for  
31 some but not all in this type.  
32  
33  
34  
35  
36  
37  
38  
39  
40  
41  
42  
43  
44

45 Characteristics of the “maintained PA” type are comparable to findings from a systematic review and  
46 meta-synthesis of the acceptability of PA interventions in older adults[15]. This review included  
47 evidence from studies of older adults ( $\geq 65$  years old) from non-clinical populations. The authors  
48 described the importance of fun and enjoyment as a motivator for engagement, as well as  
49 descriptions of functional and psychosocial improvements, related to PA participation which  
50 increase perceived value of participation, and consequently enacted behaviour. Devereux-Fitzgerald  
51 et al. include the two factors of ‘enjoyment’ and ‘value’ as central to their analytic model describing  
52  
53  
54  
55  
56  
57  
58  
59  
60

1  
2  
3  
4  
5  
6  
7  
8  
9  
10  
11  
12  
13  
14  
15  
16  
17  
18  
19  
20  
21  
22  
23  
24  
25  
26  
27  
28  
29  
30  
31  
32  
33  
34  
35  
36  
37  
38  
39  
40  
41  
42  
43  
44  
45  
46

| <b>Type</b>              | <b>Age</b>         | <b>Sex</b>      | <b>Retired % (n)</b> | <b>More than secondary education</b> | <b>Vignette</b>                                                                                                                                                                                                                                                                                                                                                                                                                                                                                                                                                                                                                                                                                                                                                                                                                                                                                                                                                                                                                                                                                                                                                                     |
|--------------------------|--------------------|-----------------|----------------------|--------------------------------------|-------------------------------------------------------------------------------------------------------------------------------------------------------------------------------------------------------------------------------------------------------------------------------------------------------------------------------------------------------------------------------------------------------------------------------------------------------------------------------------------------------------------------------------------------------------------------------------------------------------------------------------------------------------------------------------------------------------------------------------------------------------------------------------------------------------------------------------------------------------------------------------------------------------------------------------------------------------------------------------------------------------------------------------------------------------------------------------------------------------------------------------------------------------------------------------|
| Maintained PA<br>N = 13  | 41-79<br>Mean 65.4 | F = 43% (n = 6) | 57% (8)              | 35% (n = 5)                          | <p>Prior to cancer diagnosis Jean enjoyed regular participation in Nordic walking. She has enjoyed sport/physical activity throughout life but participated less during working life. She describes a sense of calm leading into her operation as she felt she had done all she could to optimise her health through the ENCOURAGE trial. She talks with passion of the importance of continued regular exercise for her health, wanting to be fit enough to enjoy life with her family and grandchildren and champions others to be active, as well as regular exercise giving her a sense of physical and mental wellbeing.</p> <p>Jean talks about having more time to prioritise exercise in her retirement and states that exercise is at the top of her to-do list each week. Exercise sessions are scheduled into her diary in advance each week and are frequently prioritised over other activities.</p> <p>Jean talks about a love of the outdoors and being active with a particular passion for Nordic walking.</p> <p>Jean walks regularly with a group and enjoys the social element with lasting friendships with other group members. <b>F, ENCOURAGE trial</b></p> |
| Intermittent PA<br>N = 5 | 60-76<br>Mean 65.8 | F = 40% (n = 3) | 20% (1)              | 60% (n=3)                            | <p>Sue talks about the importance of physical activity to maintain health and describes its importance due to being overweight and experiencing a myocardial infarction.</p> <p>Sue describes periods where she exercised regularly but is currently inactive and says 'I know I should do more'.</p> <p>Following completion of cardiac rehabilitation Sue purchased a stationary exercise bike, the intention was to use it every day which she reports doing for a few weeks before stopping.</p> <p>Sue describes a lack of enjoyment and little change in weight after using her stationary bike. She describes having low mood and a lack of motivation to continue.</p> <p>Sue also talks about regaining weight she had lost which</p>                                                                                                                                                                                                                                                                                                                                                                                                                                      |

|                       |                    |                 |         |           |                                                                                                                                                                                                                                                                                                                                                                                                                                                                                                                                                                                                                                                       |
|-----------------------|--------------------|-----------------|---------|-----------|-------------------------------------------------------------------------------------------------------------------------------------------------------------------------------------------------------------------------------------------------------------------------------------------------------------------------------------------------------------------------------------------------------------------------------------------------------------------------------------------------------------------------------------------------------------------------------------------------------------------------------------------------------|
|                       |                    |                 |         |           | makes walking and exercising uncomfortable, also reducing her motivation to exercise. <b>F, ASCOT trial</b>                                                                                                                                                                                                                                                                                                                                                                                                                                                                                                                                           |
| Low Activity<br>N = 8 | 61-76<br>Mean 68.4 | F = 50% (n = 4) | 75% (6) | 50% (n=4) | Roy describes the presence of a stoma bag 'slowing him down' and engaging in less activity since his retirement<br>He describes actively seeking opportunities to avoid long periods of sitting and undertakes tasks in and around the home.<br>Roy perceives himself to be sufficiently active compared to others of a similar age.<br>Roy talks about walking to get the paper each day but feels more structured exercise is not appropriate for his age.<br>He also talks about enjoying being able to help family members but completing jobs around the house and does not desire to increase activity levels further.<br><b>M, ASCOT trail</b> |

For peer review only

1  
2  
3 PA behaviour as seen in the 'maintained PA' type[12]. The enjoyment of social interaction (as well as  
4  
5 of PA participation in and of itself) was also a common theme in the published literature captured in  
6  
7 this review. This is supported in part by the current study but social support was not a universal  
8  
9 facilitator of continued PA engagement. Other reviews have challenged this assumption that social  
10  
11 support is a key facilitator to engagement in PA, reporting it to be important for some but not all[16-  
12  
13 17].  
14  
15

16  
17 In one of the few qualitative studies investigating long-term PA behaviour in people LWBC,  
18  
19 Midtgaard et al.[18] interviewed individuals who had participated in the Copenhagen PACT study, a  
20  
21 12 month programme to promote PA after cancer. Those interviewed described the importance of  
22  
23 prioritising PA and planning ahead to ensure regular engagement. They also described exercise as a  
24  
25 prerequisite for 'feeling and staying well'. However, as others have argued[15], a focus solely on the  
26  
27 role of PA for long-term health is unlikely to encourage long-term participation of many older adults.  
28  
29 This is in keeping with the current study whereby the majority of participants describes knowledge  
30  
31 of the value of PA for health but do not necessarily participate regularly. This is evident when we  
32  
33 consider the 'intermittent PA' type (See Figure 1.2).  
34  
35  
36  
37

38 Participants in this type described irregular engagement in structured PA, often resulting in cycles of  
39  
40 action and inaction. For example, starting an exercise class or purchasing new exercise equipment,  
41  
42 participating regularly for a period of time and then subsequently experiencing an interruption to  
43  
44 that behaviour. Typically, these participants discussed the known benefits of exercise and described  
45  
46 taking part because 'they should', often expressing extrinsically driven motivations such as a desire  
47  
48 to lose weight. Reasons for interruptions to PA participation varied and included intrinsic factors, for  
49  
50 example, boredom or low mood and extrinsic factors, such as a stressful event, ill health or caring  
51  
52 responsibilities. Once these barriers were no longer relevant participants often found it difficult to  
53  
54 re-engage due to a lack of motivation/apathy. This group also described deriving less pleasure and  
55  
56 intrinsic reward from engaging in PA than those in the maintained PA type.  
57  
58  
59  
60

1  
2  
3 Barriers identified in this study are consistent with those reported in the existing literature. A recent  
4 review of barriers and facilitators to exercise in people LWBC by cancer highlighted health problems,  
5 work and home responsibilities and lack of motivation as key barriers to engagement[11]. Others  
6 describe the deleterious effect of older age, physical decline and lack of time[16,19]. Although most  
7 studies in these reviews focused on adoption of PA rather than maintenance, the few studies that do  
8 consider long-term behaviour revealed similar obstacles. Brunet et al.[20] interviewed women with a  
9 previous diagnosis of breast cancer regarding maintenance of self-directed PA following  
10 participation in an intervention. Physical barriers were common, including arthritis and long-term  
11 effects of cancer treatment, such as fatigue as well as a lack of motivation and work and caring  
12 responsibilities. Similarly, in a study exploring experiences of PA over 5 years since diagnosis,  
13 Hefferon et al.[21] reported lack of motivation and apathy as well as the deleterious effects of the  
14 ageing process and co-morbidities and practical barriers such as proximity to exercise facilities and  
15 competing priorities as prohibitive to regular long-term PA engagement.

16  
17  
18  
19  
20  
21  
22  
23  
24  
25  
26  
27  
28  
29  
30  
31  
32  
33 When considering the cycle of action and inaction as seen in the 'intermittent PA' type it is helpful to  
34 consider theories of motivation and behaviour change that may help to explain this phenomenon.  
35  
36  
37  
38  
39  
40  
41  
42  
43  
44  
45  
46  
47  
48  
49  
50  
51  
52  
53  
54  
55  
56  
57  
58  
59  
60  
Kwasnicka et al.[22] present a systematic review of behaviour theories with a focus on maintenance  
of behaviour change and identify five key themes of which self-regulation is one. They propose that  
individuals differ in their ability to self-regulate their behaviour and those with lower self-regulatory  
capacity may have weaker intention-behaviour relationships (pg 285). It is suggested that when a  
behaviour falls short of a relevant goal, for example an individual does not attend an exercise class  
as planned, the individual must then exert more cognitive effort to 'correct' this behaviour and bring  
about satisfaction of goal achievement, or they disengage with the goal. At this stage the new  
behaviour is effortful, requiring significant self-regulation. Kwasnicka et al.[22] describe self-  
regulation as a limited cognitive resource which can be depleted through things such as stress and  
illness, and our self-regulatory reserves fluctuate throughout life. Habit formation has been  
proposed as a strategy to support behaviour maintenance (Gardner et al., in press). Habit is a



1  
2  
3 process whereby a cue triggers an impulse to act because a mental association has been learned  
4  
5 between a cue and an action[23,24]. Habits can support maintenance of behaviour because they are  
6  
7 controlled through an associative reflexive system, as opposed to an information-processing  
8  
9 system[25], meaning they continue to guide behaviours even when self-regulatory resources are  
10  
11 low. Habit formation however can be a long process[26] and maintaining motivation for long  
12  
13 enough to develop strong habits can be challenging, therefore long-term behaviour change will only  
14  
15 be achieved once the behaviour is habitual, requiring less conscious control. These suggested  
16  
17 mechanisms bear many similarities to the narratives presented by those in the intermittent activity  
18  
19 type. It is also proposed that motives for sustained behaviour must bring about regular gratification  
20  
21 and will be more successful if they are intrinsic, such as the enjoyment described by those in the  
22  
23 ‘maintained MVPA’ type in this study.  
24  
25  
26  
27

28 The third and final type described here is “*Low activity*” (see Figure 1.3). Participants in this group  
29  
30 take part in little or no structured PA but do describe avoiding long periods of sedentary time by  
31  
32 engaging in activities of low intensity such as jobs around the home. Reference is also made to  
33  
34 incidental activities such as climbing stairs in the home which are felt to maintain mobility and  
35  
36 fitness levels. As with the maintained PA type, the importance of PA to maintain mobility was  
37  
38 discussed. Those in the lower activity type felt this was achieved with lower intensity activities such  
39  
40 as walking and household chores. Levels of PA participation were felt to be appropriate for their age  
41  
42 and perceived capability. Reference was also made to reductions in activity levels compared to  
43  
44 earlier in the life. Some are content with this and attribute it as a natural consequence of ageing.  
45  
46 Others had to stop or adapt activities less willingly as a result of comorbidities and/or consequences  
47  
48 of cancer treatment. Comparisons were also made to others of a similar age with participants  
49  
50 evaluating their activity levels to be higher than their peers. Those in the low activity group describe  
51  
52 being able to carry out necessary activities of daily living and infrequently express a desire to engage  
53  
54 in additional PA. Demographic characteristics of individuals by type (see Table 4) show those in the  
55  
56 low activity group to be slightly older than those in the other types.  
57  
58  
59  
60

1  
2  
3 A number of the components of the 'low activity' type share similarities with evidence from a recent  
4 review by McGowan and colleagues who conducted a systematic review and meta-synthesis of the  
5 acceptability of PA to older adults[27]. They synthesised the evidence for community-dwelling older  
6 adults who had not been involved in PA interventions and were therefore not necessarily active or  
7 willing to be active. They describe how older adults in these studies interpreted PA as a 'by-product'  
8 of other activities and a perception that more structured and purposeful PA wasn't necessary or  
9 appropriate for them. Similar concepts were described in a review of factors influencing PA  
10 participation in people with a diagnosis of lung cancer with 'usual activities' preferred over  
11 structured exercise[16].  
12  
13  
14  
15  
16  
17  
18  
19  
20  
21  
22

### 23 **Implications for practice and future research**

24 Findings from this study have important implications for practice. Participants from all four PA  
25 programmes were represented in the three types described here demonstrating successful (or not)  
26 behaviour change was not limited to one approach. The typology reveals the need for targeted  
27 interventions to support long-term behaviour change rather than a 'one size fits all' approach. Those  
28 who have a history of exercising and/or who find activities that bring them pleasure and who hold  
29 strong values of the importance of PA will likely need minimal support to sustain engagement. In  
30 contrast individuals who experience cycles of success and failure of engagement need further  
31 support with self-regulatory process. More frequent contacts may help them identify appropriate  
32 activities, develop action plans and problem solve when they face challenges. However further  
33 research is needed to determine how best to support individuals to self-regulate independently  
34 when they experience recurrent cycles of action and inaction in order to prevent reliance on  
35 external support.  
36  
37  
38  
39  
40  
41  
42  
43  
44  
45  
46  
47  
48  
49  
50  
51  
52

53 Raising awareness of the importance and relevance of PA that goes beyond participating in  
54 incidental and daily activities is necessary in the low activity type. They also require support to alter  
55 their self-identity, to see participation in PA as an appropriate behaviour for them, which may also  
56  
57  
58  
59  
60

1  
2  
3 be facilitated by alteration of social norms. They are likely to need further support to find activities  
4 appropriate to their physical capabilities, taking into account comorbidities and long-term  
5 consequences of cancer. True for all is the importance of finding activities that are meaningful and  
6 enjoyable.  
7  
8  
9

10  
11  
12 A priority for future research is therefore to develop processes which can identify these key  
13 characteristics and determine the most appropriate support. Lastly, the striking similarities between  
14 themes presented here and those in the wider literature, particularly among clinical and non-clinical  
15 populations of older adults, suggests conclusions and therefore recommendations may be  
16 appropriate to other cancer types and non-cancer populations.  
17  
18  
19  
20  
21  
22

### 23 24 **Strengths and limitations**

25  
26  
27 Inclusion of a large sample consisting of men and women with variation in current activity levels and  
28 an age range that is representative of this disease cohort are strengths of this study. However  
29 transferability is reduced by the absence of any non-white participants, inclusion of only those with  
30 GI cancers with the vast majority married or co-habiting and most owning their own home  
31 suggesting financial security and a lack of socio-economic diversity despite attempts to maximise this  
32 during sampling.  
33  
34  
35  
36  
37  
38  
39

40  
41 It is also important to note that we present thematic descriptions of the data and higher-level  
42 conceptual models in the form of a typology. There are multiple causal mechanisms at play, often  
43 beyond the control of the individual which are not described in the typology presented here. Future  
44 work should look at mechanisms associated with these types and how these might inform the design  
45 of future PA promotion programmes. The authors also note that this typology sits within  
46 environmental and structural contexts which were not explored.  
47  
48  
49  
50  
51  
52  
53

### 54 55 56 57 58 **Conclusions**

1  
2  
3 People LWBC experience numerous challenges to sustaining increases in PA. These include cancer  
4 specific consequences such as presence of a stoma and issues with bowel habit, however many are  
5 similar to those described among non-cancer populations. The novel typology presented here  
6 supports the need for stratified approaches to long-term support for PA behaviour change. This is in  
7 keeping with emerging models of cancer care which call for personalised approaches. Future  
8 research should explore whether tailoring of interventions using these typologies produces better  
9 maintenance of PA.  
10  
11  
12  
13  
14  
15  
16  
17  
18  
19  
20  
21

22 **CONTRIBUTIONS:** CG made substantial contributions to the conception, design, acquisition of data,  
23 analysis and interpretation of data for this study. CG drafted the manuscript and approved the final  
24 versions. CF made substantial contributions to the conception and design of the study,  
25 interpretation of the data, provided critical intellectual content and approved the final version. CRM  
26 made substantial contributions to the conception, design of the study, analysis and interpretation of  
27 the data, provided critical intellectual content and approved the final version. TC made substantial  
28 contributions to the data analysis and interpretation, provided critical intellectual content and  
29 approved the final version. BMP made substantial contributions to the conception of the design of  
30 the study, provided critical intellectual content and approved the final version. MM made substantial  
31 contributions to interpretation of the data, provided critical intellectual content and approved the  
32 final version. PL made substantial contributions to the acquisition of data, provided critical  
33 intellectual content and approved the final version of the manuscript. KB made substantial  
34 contributions of interpretation of the data provided critical intellectual content and approved the  
35 final version. All authors agree to be accountable for all aspects of the work.  
36  
37  
38  
39  
40  
41  
42  
43  
44  
45  
46  
47  
48  
49  
50  
51  
52  
53

54 **Acknowledgement:** We would like to acknowledge the work of colleagues who assisted in the  
55 identification of participants to this study including Samantha Leggett (ENCOURAGE trial), Liam  
56 Humphreys (Active Everyday), Nuala McVeigh, Kelly Irwin, Eimear Hagan and Diarmaid McAuley  
57  
58  
59  
60

1  
2  
3 from Move More Northern Ireland. Finally we would like to thank the participants for their time and  
4  
5 invaluable contribution.  
6  
7

8 **FUNDING:** This study was funded by a National Institute for Health Research (NIHR), Post-doctoral  
9 fellowship. The publication presents the independent research funded by the NIHR. The views  
10 expressed are those of the authors and not necessarily those of the NHS, the NIHR or the  
11 Department of Health and Social Care.  
12  
13  
14

15 **CONFLICT OF INTEREST:** None to declare  
16  
17  
18  
19  
20  
21  
22  
23  
24  
25  
26  
27  
28  
29  
30  
31  
32  
33  
34  
35  
36  
37  
38  
39  
40  
41  
42  
43  
44  
45  
46  
47  
48  
49  
50  
51  
52  
53  
54  
55  
56  
57  
58  
59  
60

For peer review only

1  
2  
3 **FIGURE LEGENDS**  
4

5 **Figure 1.1: Maintained PA**  
6

7  
8 **Figure 1.2: Intermittent PA**  
9

10 **Figure 1.3: Low activity**  
11  
12  
13  
14  
15  
16  
17  
18  
19  
20  
21  
22  
23  
24  
25  
26  
27  
28  
29  
30  
31  
32  
33  
34  
35  
36  
37  
38  
39  
40  
41  
42  
43  
44  
45  
46  
47  
48  
49  
50  
51  
52  
53  
54  
55  
56  
57  
58  
59  
60

For peer review only

1  
2  
3 **REFERENCES**  
4  
5

- 6 1. Campbell KL, Winters-Stone KM, Wiskemann J, et al. Exercise Guidelines for Cancer  
7 Survivors: Consensus Statement from International Multidisciplinary Roundtable. *Med Sci Sports*  
8 *Exerc.* 2019;51(11):2375-90. doi: 10.1249/MSS.0000000000002116.  
9  
10  
11  
12 2. Force ICT. Achieving world-class cancer outcomes: A strategy for England 2015-2020. 2015.  
13  
14 3. Blair SN, Morris JN. Healthy Hearts-and the Universal Benefits of Being Physically Active:  
15 Physical Activity and Health. *Annals of Epidemiology.* 2009;19(4):253-6.  
16  
17 doi:10.1016/j.annepidem.2009.01.019  
18  
19 4. Grimmett C, Wardle J, Steptoe A. Health behaviours in older cancer survivors in the English  
20 Longitudinal Study of Ageing. *Eur J Cancer.* 2009;45(12):2180-6. doi: 10.1016/j.ejca.2009.02.024  
21  
22 [published Online First: 26 May 2009].  
23  
24 5. Turner RR, Steed L, Quirk H, et al. Interventions for promoting habitual exercise in people  
25 living with and beyond cancer. *Cochrane Database of Syst Rev.* 2018 Sept 19;9:CD010192. doi:  
26  
27 10.1002/14651858.CD010192.pub3  
28  
29 6. Roberts AL, Fisher A, Smith L, et al. Digital health behaviour change interventions targeting  
30 physical activity and diet in cancer survivors: a systematic review and meta-analysis. *J of Cancer*  
31 *Surviv.* 2017;11(6):704-719.. doi: 10.1007/s11764-017-0632-1. [published Online first: 4 Aug 2017].  
32  
33 7. Pinto B, Stein K, Dunsiger S. Peer mentorship to promote physical activity among cancer  
34 survivors: effects on quality of life. *Psychooncology.* 2015;24(10):1295-302.  
35  
36 10.1016/j.ejon.2017.06.006 [published Online First 10 Jul 2017].  
37  
38 8. Grimmett C, Corbett T, Brunet J, et al. Systematic review and meta-analysis of maintenance  
39 of physical activity behaviour change in cancer survivors. *Int J Behav Nutr Phys Act.* 2019;16(1):37.  
40  
41 doi: 10.1186/s12966-019-0787-4.  
42  
43 9. Morey MC, Blair CK, Sloane, et al. Group trajectory analysis helps to identify older cancer  
44 survivors who benefit from distance-based lifestyle interventions. *Cancer.* 2015;121(24):4433-40.  
45  
46 doi: 10.1002/cncr.29684. [published Online First: 29 Oct 2015].  
47  
48  
49  
50  
51  
52  
53  
54  
55  
56  
57  
58  
59  
60

- 1  
2  
3 10. Drury A, Payne S, Brady AM. Cancer survivorship: Advancing the concept in the context of  
4 colorectal cancer. *Enr J Oncol Nurs*. 2017;29:135-47. doi: 10.1016/j.ejon.2017.06.006. [published  
5  
6  
7 Online First: 10 Jul 2017].  
8
- 9  
10 11. Clifford BK, Mizrahi D, Sandler, et al. Barriers and facilitators of exercise experienced by  
11  
12 cancer survivors: a mixed methods systematic review. *Supportive Care Cancer*. 2018;26(3):685-700.  
13  
14 doi: 10.1007/s00520-017-3964. [published Online First: 28 Nov 2017].  
15
- 16  
17 12. Tong A, Sainsbury P, Craig J. Consolidated criteria for reporting qualitative research (COREQ):  
18  
19 a 32-item checklist for interviews and focus groups. *International Journal for Quality in Health Care*.  
20  
21 2007;19(6):349-57. doi.org/10.1093/intqhc/mzm042. [published Online First: 14 Sept 2007].  
22
- 23  
24 13. Braun V, Clarke V. Using thematic analysis in psychology. *Qualitative Research in Psychology*.  
25  
26 2006;3(2):77-101.  
27
- 28  
29 14. Kluge. Empirically Grounded Construction of Types and Typologies in Qualitative Social  
30  
31 Reserach: Forum: Qualitative Social Research 2007 1 (1), Art. 14:[Available from: [http://nbn-](http://nbn-resolving.de/urn:nbn:de:0114-fqs0001145)  
32  
33 [resolving.de/urn:nbn:de:0114-fqs0001145](http://nbn-resolving.de/urn:nbn:de:0114-fqs0001145)]. Accessed Jan 2020.  
34
- 35  
36 15. Devereux-Fitzgerald A, Powell R, Dewhurst A, et al.. The acceptability of physical activity  
37  
38 interventions to older adults: A systematic review and meta-synthesis. *Soc Sci & Med*. 2016;158:14-  
39  
40 23. doi: 10.1016/j.socscimed.2016.04.006. [published Online First: 10 Apr 2016].  
41
- 42  
43 16. Fox L, Wiseman T, Cahill D, et al. Barriers and facilitators to physical activity in men with  
44  
45 prostate cancer: A qualitative and quantitative systematic review. *Psychooncology*.  
46  
47 2019;28(12):2270-85. doi: 10.1002/pon.5240. [published Online First: 6 Nov 2019].  
48
- 49  
50 17. McDonough MH, Beselt LJ, Daun JT, et al. The role of social support in physical activity for  
51  
52 cancer survivors: A systematic review. *Psychooncology*. 2019;28(10):1945-58. doi:  
53  
54 10.1002/pon.5171. [published Online First: 16 Aug 2019].  
55
- 56  
57 18. Midtgaard J, Rossell K, Christensen JF, et al. Demonstration and manifestation of self-  
58  
59 determination and illness resistance-A qualitative study of long-term maintenance of physical  
60



- 1  
2  
3 activity in posttreatment cancer survivors. *Supportive Care Cancer*. 2012;20(9):1999-2008. doi:  
4  
5 10.1007/s00520-011-1304-8. [published Online First: 15 Nov 2011].  
6  
7  
8 19. Granger CL, Connolly B, Denehy L, et al. Understanding factors influencing physical activity  
9  
10 and exercise in lung cancer: a systematic review. *Support Care Cancer*. 2017;25(3):983-99. doi:  
11  
12 10.1007/s00520-016-3484-8. [published Online First: 29 Nov 2016].  
13  
14  
15 20. Brunet J, Taran S, Burke S, et al. A qualitative exploration of barriers and motivators to  
16  
17 physical activity participation in women treated for breast cancer. *Disabil Rehabil*. 2013;35(24):2038-  
18  
19 45. doi: 10.3109/09638288.2013.802378. [published Online First: 17 Jun 2013].  
20  
21  
22 21. Hefferon K, Murphy H, McLeod J, et al. Understanding barriers to exercise implementation  
23  
24 5-year post-breast cancer diagnosis: a large-scale qualitative study. *Health Educ Res*. 2013;28(5):843-  
25  
26 56. doi: 10.1093/her/cyt083. [published Online First: 22 Aug 2013].  
27  
28  
29 22. Kwasnicka D, Dombrowski SU, White M, et al. Theoretical explanations for maintenance of  
30  
31 behaviour change: a systematic review of behaviour theories. *Health Psychology Review*.  
32  
33 2016;10(3):277-96. doi: 10.1080/17437199.2016.1151372. [published Online First: 7 Mar 2016].  
34  
35  
36 23. Gardner B. A review and analysis of the use of 'habit' in understanding, predicting and  
37  
38 influencing health-related behaviour. *Health Psychol Rev*. 2015;9(3):277-95. doi:  
39  
40 10.1080/17437199.2013.876238. [published Online First: 21 Jan 2014].  
41  
42  
43 24. Wood W, Rünger D. Psychology of Habit. *Annu Rev Psychol*. 2016;67(1):289-314. doi:  
44  
45 10.1146/annurev-psych-122414-033417. [published Online First: 10 Sept 2015].  
46  
47  
48 25. Strack F, Deutsch R. Reflective and impulsive determinants of social behavior. *Pers Soc*  
49  
50 *Psychol Rev*. 2004;8(3):220-47.  
51  
52  
53 26. Lally P, van Jaarsveld CHM, Potts HWW, et al. How are habits formed: Modelling habit  
54  
55 formation in the real world. *Eur J of Social Psych*. 2010;40(6):998-1009. Doi.org/10.1002/ejsp.674.  
56  
57 [published Online First: 16 Jul 2009].  
58  
59  
60 27. McGowan LJ, Devereux-Fitzgerald A, Powell R, et al.. How acceptable do older adults find the  
concept of being physically active? A systematic review and meta-synthesis. *Int Rev Sport Ex Psycho*.

1  
2  
3 2018;11(1):1-24. [doi.org/10.1080/1750984X.2016.1272705](https://doi.org/10.1080/1750984X.2016.1272705). [published Online First: 16 Jan 2017].  
4

5 28. Lally P, Gardner B. Promoting habit formation. *Health Psychology Review*.  
6

7 2013;7(sup1):S137-S58. [doi.org/10.1080/17437199.2011.603640](https://doi.org/10.1080/17437199.2011.603640). [published Online First: 11 Oct  
8  
9 2011].  
10

11 29. Beeken RJ, Croker H, Heinrich M, et al. Study protocol for a randomised controlled trial of  
12 brief, habit-based, lifestyle advice for cancer survivors: exploring behavioural outcomes for the  
13  
14 Advancing Survivorship Cancer Outcomes Trial (ASCOT). *BMJ Open*. 2016;6(11). doi:  
15  
16 10.1136/bmjopen-2016-011646.  
17  
18  
19

20 30. Humphreys L, Crank H, Frith G, et al.. Bright spots, physical activity investments that work:  
21  
22 Active Everyday, Sheffield's physical activity service for all people living with and beyond cancer.  
23  
24 *British Journal of Sports Medicine*. 2019;53(13):837-8. [published Online First: 14 June 2019].  
25  
26  
27  
28  
29  
30  
31  
32  
33  
34  
35  
36  
37  
38  
39  
40  
41  
42  
43  
44  
45  
46  
47  
48  
49  
50  
51  
52  
53  
54  
55  
56  
57  
58  
59  
60

Figure 1.1: Maintained PA

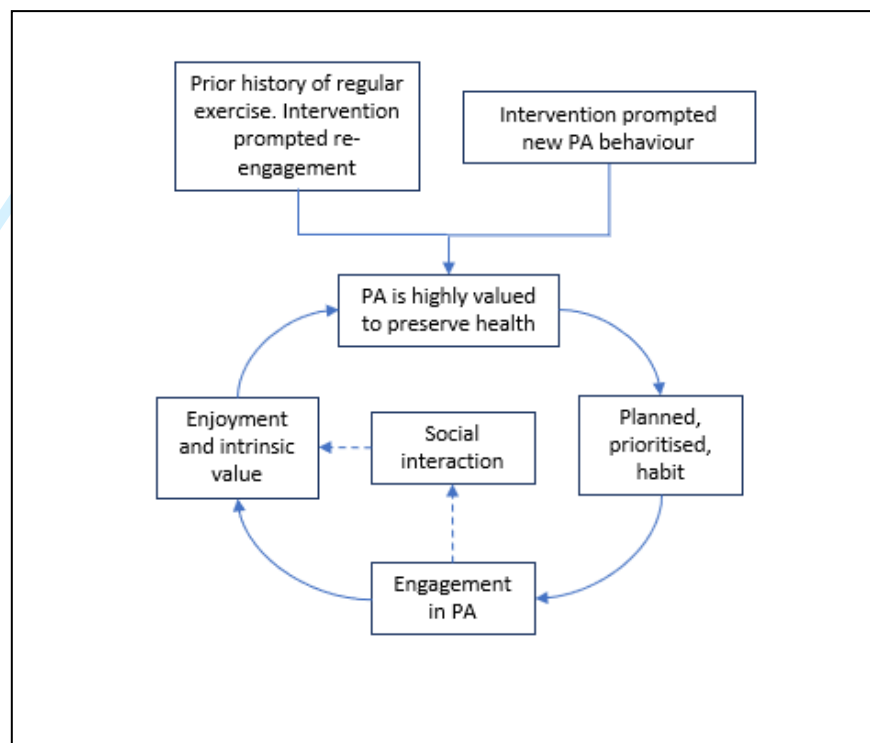

Figure 1.2: Intermittent PA

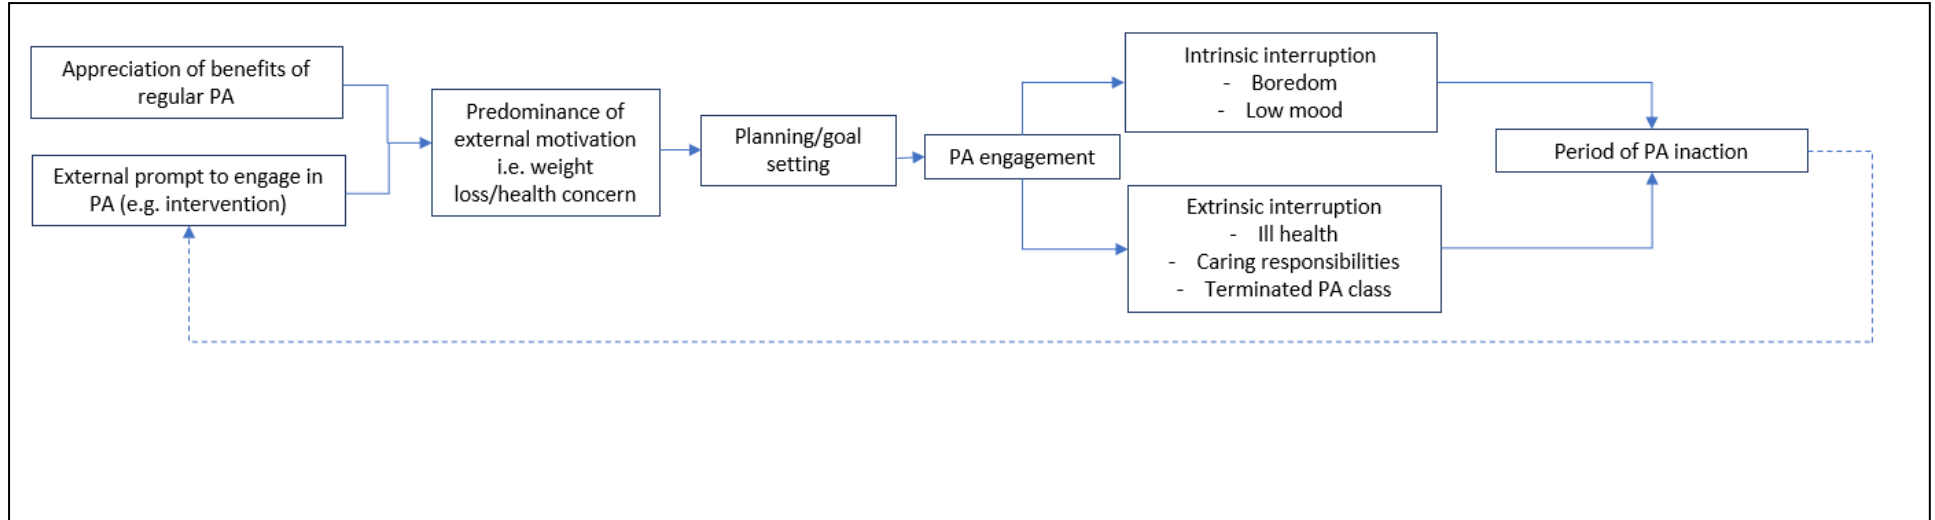

ew only

Figure 1.3: Low activity

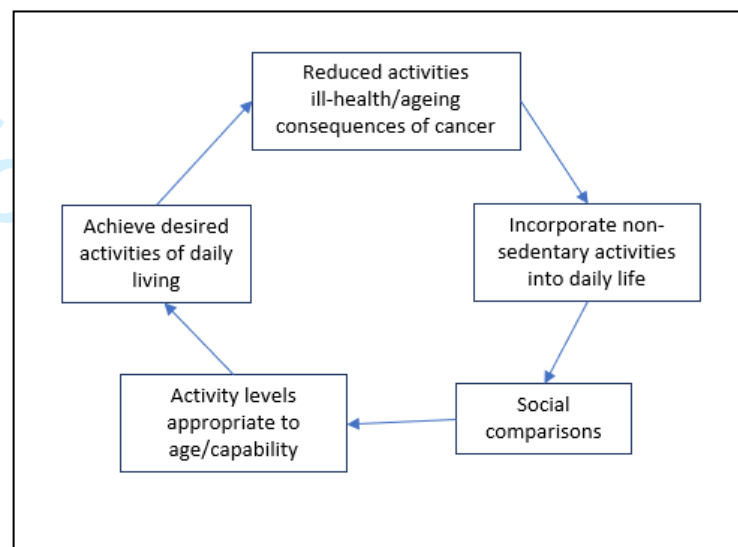

## COREQ (CONsolidated criteria for REporting Qualitative research) Checklist

A checklist of items that should be included in reports of qualitative research. You must report the page number in your manuscript where you consider each of the items listed in this checklist. If you have not included this information, either revise your manuscript accordingly before submitting or note N/A.

| Topic                                          | Item No. | Guide Questions/Description                                                                                                                              | Reported on Page No. |
|------------------------------------------------|----------|----------------------------------------------------------------------------------------------------------------------------------------------------------|----------------------|
| <b>Domain 1: Research team and reflexivity</b> |          |                                                                                                                                                          |                      |
| <i>Personal characteristics</i>                |          |                                                                                                                                                          |                      |
| Interviewer/facilitator                        | 1        | Which author/s conducted the interview or focus group?                                                                                                   |                      |
| Credentials                                    | 2        | What were the researcher's credentials? E.g. PhD, MD                                                                                                     |                      |
| Occupation                                     | 3        | What was their occupation at the time of the study?                                                                                                      |                      |
| Gender                                         | 4        | Was the researcher male or female?                                                                                                                       |                      |
| Experience and training                        | 5        | What experience or training did the researcher have?                                                                                                     |                      |
| <i>Relationship with participants</i>          |          |                                                                                                                                                          |                      |
| Relationship established                       | 6        | Was a relationship established prior to study commencement?                                                                                              |                      |
| Participant knowledge of the interviewer       | 7        | What did the participants know about the researcher? e.g. personal goals, reasons for doing the research                                                 |                      |
| Interviewer characteristics                    | 8        | What characteristics were reported about the interviewer/facilitator? e.g. Bias, assumptions, reasons and interests in the research topic                |                      |
| <b>Domain 2: Study design</b>                  |          |                                                                                                                                                          |                      |
| <i>Theoretical framework</i>                   |          |                                                                                                                                                          |                      |
| Methodological orientation and Theory          | 9        | What methodological orientation was stated to underpin the study? e.g. grounded theory, discourse analysis, ethnography, phenomenology, content analysis |                      |
| <i>Participant selection</i>                   |          |                                                                                                                                                          |                      |
| Sampling                                       | 10       | How were participants selected? e.g. purposive, convenience, consecutive, snowball                                                                       |                      |
| Method of approach                             | 11       | How were participants approached? e.g. face-to-face, telephone, mail, email                                                                              |                      |
| Sample size                                    | 12       | How many participants were in the study?                                                                                                                 |                      |
| Non-participation                              | 13       | How many people refused to participate or dropped out? Reasons?                                                                                          |                      |
| <i>Setting</i>                                 |          |                                                                                                                                                          |                      |
| Setting of data collection                     | 14       | Where was the data collected? e.g. home, clinic, workplace                                                                                               |                      |
| Presence of non-participants                   | 15       | Was anyone else present besides the participants and researchers?                                                                                        |                      |
| Description of sample                          | 16       | What are the important characteristics of the sample? e.g. demographic data, date                                                                        |                      |
| <i>Data collection</i>                         |          |                                                                                                                                                          |                      |
| Interview guide                                | 17       | Were questions, prompts, guides provided by the authors? Was it pilot tested?                                                                            |                      |
| Repeat interviews                              | 18       | Were repeat interviews carried out? If yes, how many?                                                                                                    |                      |
| Audio/visual recording                         | 19       | Did the research use audio or visual recording to collect the data?                                                                                      |                      |
| Field notes                                    | 20       | Were field notes made during and/or after the interview or focus group?                                                                                  |                      |
| Duration                                       | 21       | What was the duration of the interviews or focus group?                                                                                                  |                      |
| Data saturation                                | 22       | Was data saturation discussed?                                                                                                                           |                      |
| Transcripts returned                           | 23       | Were transcripts returned to participants for comment and/or                                                                                             |                      |

| Topic                                  | Item No. | Guide Questions/Description                                                                                                        | Reported on Page No. |
|----------------------------------------|----------|------------------------------------------------------------------------------------------------------------------------------------|----------------------|
|                                        |          | correction?                                                                                                                        |                      |
| <b>Domain 3: analysis and findings</b> |          |                                                                                                                                    |                      |
| <i>Data analysis</i>                   |          |                                                                                                                                    |                      |
| Number of data coders                  | 24       | How many data coders coded the data?                                                                                               |                      |
| Description of the coding tree         | 25       | Did authors provide a description of the coding tree?                                                                              |                      |
| Derivation of themes                   | 26       | Were themes identified in advance or derived from the data?                                                                        |                      |
| Software                               | 27       | What software, if applicable, was used to manage the data?                                                                         |                      |
| Participant checking                   | 28       | Did participants provide feedback on the findings?                                                                                 |                      |
| <i>Reporting</i>                       |          |                                                                                                                                    |                      |
| Quotations presented                   | 29       | Were participant quotations presented to illustrate the themes/findings?<br>Was each quotation identified? e.g. participant number |                      |
| Data and findings consistent           | 30       | Was there consistency between the data presented and the findings?                                                                 |                      |
| Clarity of major themes                | 31       | Were major themes clearly presented in the findings?                                                                               |                      |
| Clarity of minor themes                | 32       | Is there a description of diverse cases or discussion of minor themes?                                                             |                      |

Developed from: Tong A, Sainsbury P, Craig J. Consolidated criteria for reporting qualitative research (COREQ): a 32-item checklist for interviews and focus groups. *International Journal for Quality in Health Care*. 2007. Volume 19, Number 6: pp. 349 – 357

**Once you have completed this checklist, please save a copy and upload it as part of your submission. DO NOT include this checklist as part of the main manuscript document. It must be uploaded as a separate file.**

## Appendix A – Interview guide

- What did you do as part of the [name physical activity programme]?
- How did you incorporate this into your day to day life?
- How are things now in relation to your physical activity habits?
- For those who describe increased/regular physical activity engagement:
  - What has helped you to make these changes?
  - Have there been any challenges to you staying active?
  - Why have you made these changes?
  - Has anyone else helped you to stay active?
  - Did you have to make changes to other parts of your life to incorporate more physical activity?
  - How does your activity impact on you? Prompt - How does it make you feel? Does it affect any other areas of your life?
  - In what way is physical activity important to your everyday life?
- For those who describe no change in physical activity levels:
  - Would you like to be doing anything differently?
  - If yes – what are the main things that prevent you from being more active?
- For those who describe an initial increase but then a decline in physical activity levels:
  - Why do you think your activity levels reduced after the trial?
  - Would you like to be doing anything differently?
  - If yes – what are the main things that prevent you from doing so?
- How do your physical activity habits compare to times before your cancer diagnosis?



# BMJ Open

## Exploring maintenance of physical activity behaviour change among people living with and beyond gastrointestinal cancer: A cross-sectional qualitative study and typology

|                                 |                                                                                                                                                                                                                                                                                                                                                                                                                                                                                                                                                                                                                                                                                                                                                                                                                                                                              |
|---------------------------------|------------------------------------------------------------------------------------------------------------------------------------------------------------------------------------------------------------------------------------------------------------------------------------------------------------------------------------------------------------------------------------------------------------------------------------------------------------------------------------------------------------------------------------------------------------------------------------------------------------------------------------------------------------------------------------------------------------------------------------------------------------------------------------------------------------------------------------------------------------------------------|
| Journal:                        | <i>BMJ Open</i>                                                                                                                                                                                                                                                                                                                                                                                                                                                                                                                                                                                                                                                                                                                                                                                                                                                              |
| Manuscript ID                   | bmjopen-2020-037136.R1                                                                                                                                                                                                                                                                                                                                                                                                                                                                                                                                                                                                                                                                                                                                                                                                                                                       |
| Article Type:                   | Original research                                                                                                                                                                                                                                                                                                                                                                                                                                                                                                                                                                                                                                                                                                                                                                                                                                                            |
| Date Submitted by the Author:   | 28-Jul-2020                                                                                                                                                                                                                                                                                                                                                                                                                                                                                                                                                                                                                                                                                                                                                                                                                                                                  |
| Complete List of Authors:       | Grimmett, Chloe; University of Southampton, Macmillan Survivorship Research Group, School of Health Sciences, Bld 67, Highfield Campus Foster, Claire; University of Southampton, Macmillan Survivorship Research Group, School of Health Sciences, Bld 67, Highfield Campus Bradbury, Katherine; University of Southampton, Centre for Clinical and Community Health Psychology<br>Lally, Phillippa; University College London Medical School, ; UCL May, Carl; London School of Hygiene and Tropical Medicine Faculty of Epidemiology and Population Health<br>Myall, Michelle; University of Southampton, NIHR ARC Wessex, School of Health Sciences, Bld 67, Highfield Campus<br>Pinto, Bernardine; University of South Carolina, College of Nursing<br>Corbett, Teresa; University of Southampton, NIHR ARC Wessex, School of Health Sciences, Bld 67, Highfield Campus |
| <b>Primary Subject Heading</b>: | Oncology                                                                                                                                                                                                                                                                                                                                                                                                                                                                                                                                                                                                                                                                                                                                                                                                                                                                     |
| Secondary Subject Heading:      | Qualitative research                                                                                                                                                                                                                                                                                                                                                                                                                                                                                                                                                                                                                                                                                                                                                                                                                                                         |
| Keywords:                       | ONCOLOGY, SPORTS MEDICINE, QUALITATIVE RESEARCH                                                                                                                                                                                                                                                                                                                                                                                                                                                                                                                                                                                                                                                                                                                                                                                                                              |
|                                 |                                                                                                                                                                                                                                                                                                                                                                                                                                                                                                                                                                                                                                                                                                                                                                                                                                                                              |

SCHOLARONE™  
Manuscripts



I, the Submitting Author has the right to grant and does grant on behalf of all authors of the Work (as defined in the below author licence), an exclusive licence and/or a non-exclusive licence for contributions from authors who are: i) UK Crown employees; ii) where BMJ has agreed a CC-BY licence shall apply, and/or iii) in accordance with the terms applicable for US Federal Government officers or employees acting as part of their official duties; on a worldwide, perpetual, irrevocable, royalty-free basis to BMJ Publishing Group Ltd ("BMJ") its licensees and where the relevant Journal is co-owned by BMJ to the co-owners of the Journal, to publish the Work in this journal and any other BMJ products and to exploit all rights, as set out in our [licence](#).

The Submitting Author accepts and understands that any supply made under these terms is made by BMJ to the Submitting Author unless you are acting as an employee on behalf of your employer or a postgraduate student of an affiliated institution which is paying any applicable article publishing charge ("APC") for Open Access articles. Where the Submitting Author wishes to make the Work available on an Open Access basis (and intends to pay the relevant APC), the terms of reuse of such Open Access shall be governed by a Creative Commons licence – details of these licences and which [Creative Commons](#) licence will apply to this Work are set out in our licence referred to above.

Other than as permitted in any relevant BMJ Author's Self Archiving Policies, I confirm this Work has not been accepted for publication elsewhere, is not being considered for publication elsewhere and does not duplicate material already published. I confirm all authors consent to publication of this Work and authorise the granting of this licence.

1  
2  
3 **Exploring maintenance of physical activity behaviour change among people living with and**  
4 **beyond gastrointestinal cancer: A cross-sectional qualitative study and typology**  
5  
6  
7

8 Chloe Grimmett, Claire Foster, Katherine Bradbury, Phillippa Lally, Carl R May, Michelle Myall,  
9 Bernardine Pinto, Teresa Corbett  
10  
11

12 Prof Claire Foster, Macmillan Survivorship Research Group, School of Health Sciences, University of  
13 Southampton, Southampton SO17 1BJ, UK  
14  
15

16 Dr Katherine Bradbury, Centre for Clinical and Community Health Psychology, University of  
17 Southampton, Southampton SO17 1BJ, UK  
18  
19

20 Dr Phillippa Lally, Research Department of Behavioural Science and Health, UCL, Gower Street,  
21 London WC1E 6BT, UK  
22  
23

24 Prof C R May, Faculty of Public Health and Policy, London School of Hygiene and Tropical Medicine,  
25 London WC1H 9SH, UK  
26  
27

28 Dr Michelle Myall, NIHR ARC Wessex, School of Health Sciences, University of Southampton,  
29 Southampton SO17 1BJ, UK  
30  
31

32 Dr Bernardine Pinto, College of Nursing, University of South Carolina, SC 29208, USA  
33  
34

35 Dr Teresa Corbett, NIHR ARC Wessex, School of Health Sciences, University of Southampton,  
36 Southampton SO17 1BJ, UK  
37  
38

39  
40  
41 **Corresponding author:** Dr Chloe Grimmett, School of Health Sciences, University of Southampton,  
42 Southampton SO17 1BJ, UK. Tel +44 (0)2380 597964. Email: C.Grimmett@soton.ac.uk  
43  
44  
45

46  
47  
48 **Word count:** 4757  
49  
50

51  
52 **Key words:** physical activity, cancer, maintenance, typology, barriers, facilitators  
53  
54  
55  
56  
57  
58  
59  
60

**Abstract**

Objectives: In the last decade there has been a rapid expansion of physical activity (PA) promotion programmes and interventions targeting people living with and beyond cancer. The impact that these initiatives have on long-term maintenance of PA remains under-researched. This study sought to explore the experiences of participants in order to characterise those who have and have not successfully sustained increases in PA following participation in a PA intervention after a diagnosis of gastrointestinal cancer, and identify barriers and facilitators of this behaviour.

Design: Cross-sectional qualitative study. Semi-structured interviews with participants who had previously taken part in a physical activity program in the UK explored current and past PA behaviour and factors that promoted or inhibited regular PA participation. Interviews were audio recorded, transcribed verbatim and analysed using thematic analysis. Themes and sub-themes were identified. Differences between individuals were recognised and a typology of PA engagement was developed.

Participants: Twenty-seven individuals (N = 15 male, mean age = 66.3 years) with a diagnosis of GI cancer who had participated in one of four interventions designed to encourage PA participation.

Setting: United Kingdom.

Results: Seven themes were identified: disease processes, the role of ageing, emotion and psychological well-being, incorporating PA into everyday life, social interaction, support and self-monitoring and competing demands. A typology with three types describing long-term PA engagement was generated 1) maintained PA, 2) intermittent PA, 3) low activity. Findings indicate that identifying an enjoyable activity that is appropriate to an individual's level of physical functioning and is highly valued is key to supporting long-term PA engagement.

Conclusion: The typology described here can be used to guide stratified and personalised intervention development and support sustained PA engagement by people living with and beyond cancer.

### Strengths and limitations of this study:

- This qualitative study using in-depth interviews with individuals engaging in varying levels of physical activity provides novel insight into the barriers and facilitators to long-term physical activity engagement after diagnosis and treatment of cancer.
- The typology presented can help inform the design and delivery of personalised physical activity interventions to support long-term behaviour change.
- Findings may be limited because participants were recruited from completed physical activity interventions and therefore do not reflect the views and experiences of individual who were unwilling or unable to take part in such a trial.

### INTRODUCTION

There is robust evidence that physical activity (PA) can provide improvements in physiological and psychosocial outcomes in people living with and beyond cancer (LWBC), including enhanced quality of life, physical function and reductions in cancer-related fatigue[1]. Furthermore, observational data suggest PA may reduce cancer recurrence, death from cancer and other causes in some cancer types. Therefore, cancer survivors potentially stand to benefit considerably from engagement in PA and consequently it is recommended that regular PA be promoted as part of the cancer care pathway[2]. The most recent guidelines from the American College of Sports Medicine suggest those LWBC should avoid inactivity and aim to achieve public health guidelines of 150 minutes per week of aerobic exercise and twice a week resistance exercise. This level of PA can also reduce the risk of developing chronic diseases, delay decline in physical and mental functioning associated with aging, and extend life[3].

1  
2  
3 The majority of cancer survivors do not meet these recommendations, and are less active than those  
4 without a history of cancer[4]. There has been a rapid expansion of PA promotion programmes and  
5 interventions targeting people LWBC to address this imbalance. Evidence suggests on-site  
6 supervised, home-based, web-based, individual and group and peer-support interventions can  
7 successfully increase PA in the short and medium term[5-7]. Furthermore, a recent systematic  
8 review and meta-analysis of long-term PA behaviour reported a moderate impact at least 3 months  
9 post-intervention completion[8]. However, there is wide variation of impact at an individual level  
10 with large standard deviations in self-reported and/or objectively recorded PA. This is elegantly  
11 illustrated by Morey and colleague's trajectory analysis of the RENEW study, a broad-reach  
12 intervention delivered by printed materials and telephone to older adults with a diagnosis of  
13 cancer[9]. The authors report a small proportion (7%) of participants did not engage in any PA at any  
14 point during the study. This is in contrast to 33% who increased PA at the end of the intervention but  
15 declined during the observational follow-up and around 60% who maintained increases in PA during  
16 the intervention and 12-month follow-up period. If interventions are to be developed that  
17 successfully support as many individuals as possible to maintain a physically active lifestyle we need  
18 to understand factors that promote and inhibit this maintenance of PA.

19  
20  
21  
22  
23  
24  
25  
26  
27  
28  
29  
30  
31  
32  
33  
34  
35  
36  
37  
38  
39  
40 Individuals diagnosed with gastrointestinal (GI) cancers, such as colon, rectal, stomach and  
41 oesophageal are a particularly important group to consider. Affecting both men and women, cancers  
42 of the colon and rectum are particularly prevalent in older age which means individuals frequently  
43 present with other comorbidities. Individuals LWB GI cancer may also experience troublesome  
44 symptoms such as stool frequency and urgency, incontinence, fatigue and pain[10] making adoption  
45 and maintenance of PA particularly challenging.

46  
47  
48  
49  
50  
51  
52  
53  
54  
55  
56  
57  
58  
59  
60  
There is a paucity of published literature exploring challenges and enablers to long-term PA  
behaviour change among cancer populations. A recent mixed methods review investigated barriers,  
facilitators and preferences for PA among people LWBC and found that common barriers were

1  
2  
3 treatment-related side effects, lack of time and fatigue[11]. Facilitators included exercising to gain  
4 control over health and feelings of well-being. However, the majority of studies in this review  
5 focused on uptake and/or participation in interventions, with little attention paid to experiences of  
6 independent and sustained (or not) behaviour change post-intervention. Furthermore, only 4 of the  
7  
8  
9  
10  
11  
12 19 studies included individuals with GI cancer.

13  
14  
15 This paper reports findings from a qualitative study that sought to explore the experiences of  
16 participants in order to characterise those who have and have not successfully sustained increases in  
17 PA following participation in a PA intervention after a diagnosis of GI cancer, and identify factors that  
18 promote and inhibit this behaviour.  
19  
20  
21  
22  
23  
24  
25  
26  
27

## 28 **1. METHODS**

### 29 **2.1 Recruitment and procedure**

30  
31  
32  
33 Participants were recruited from four PA promotion programmes in England and Northern Ireland  
34 (see Table 1). The coordinators of the programmes identified eligible participants: previous diagnosis  
35 of colorectal, oesophageal or stomach cancer and had completed the PA programme more than 6  
36 months before participating in the current study and sent a letter of invitation to take part in the  
37 current study. Those who were willing were asked to return a reply slip to the coordinating centre at  
38 the University of Southampton.  
39  
40  
41  
42  
43  
44  
45  
46  
47  
48  
49  
50  
51

52 **Table 1: Programmes from which participants were recruited.**

| 53 <b>Project</b>                                                   | 54 <b>Description</b>                                                                                                                                                                                                                                                         |
|---------------------------------------------------------------------|-------------------------------------------------------------------------------------------------------------------------------------------------------------------------------------------------------------------------------------------------------------------------------|
| 55 The Advancing Survivor<br>56 Cancer Outcomes Trial<br>57 (ASCOT) | 58 A lifestyle programme for those diagnosed with breast, prostate<br>59 or colorectal cancer. ASCOT was a distance-based lifestyle<br>60 intervention, delivered through printed materials and personally<br>tailored telephone discussions underpinned by habit theory[12]. |

|                                                                                                               |                                                                                                                                                                                                                                                                    |
|---------------------------------------------------------------------------------------------------------------|--------------------------------------------------------------------------------------------------------------------------------------------------------------------------------------------------------------------------------------------------------------------|
|                                                                                                               | See published protocol[13]. Identified participants had a previous diagnosis of colorectal cancer and had set at least one PA goal during the study.                                                                                                               |
| Efficacy of an exercise training programme during Concurrent neoadjuvant cancer treatments) trial (ENCOURAGE) | ENCOURAGE participants took part in a structured, supervised hospital-based exercise programme before during and after cancer treatments and prior to surgery.                                                                                                     |
| Active Everyday                                                                                               | A PA referral programme based in Sheffield, UK. Participants received personalised behaviour change support and sign-posting to local PA opportunities[14]. Colorectal cancer only.                                                                                |
| Macmillan Move More Programme – Northern Ireland                                                              | Participants receive personalised support with one-to-one consultations and advice to increase their activity levels and appropriate sign-posting to local opportunities including group-based exercise programmes for people LWBC cancer. Colorectal cancer only. |

## 2.2 Ethical statement

Ethical approval was obtained from the Health Research Authority and the University of Southampton Research Ethics committee prior to recruitment and data collection. Participants were provided with information sheets and gave written consent prior to interview.

## 2.3 Procedure

The study was reported according to the Consolidation Criteria for Reporting Qualitative Research (COREQ)[15]. See supplementary file 1.

All interviews were conducted by CG (an experienced qualitative researcher) and audio-recorded (with consent) using an encrypted electronic device. CG is a member of the trial steering committee for the ASCOT study but did not have direct involvement with the delivery of the intervention.

Participants were informed that the current study was independent of the study in which they had previously taken part.

One-to-one telephone interviews took place between January and June 2019 and lasted between 40 and 75 minutes. Semi-structured Interviews were carried out using a topic guide comprising open



1  
2  
3 questions designed to explore and capture data on factors that influenced the maintenance (or not)  
4  
5 of PA following participation in a PA programme (see supplementary file 2).  
6  
7

8 Participants were also asked to complete a short demographics questionnaire to capture, age, sex,  
9  
10 cancer type, marital status, ethnicity, level of education, home and car ownership, occupation and  
11  
12 caring responsibilities.  
13  
14

## 15 **2.4 Analysis**

16  
17 A thematic analysis was conducted as described by Braun & Clarke[16]. A recursive process was  
18  
19 employed, moving back and forth between stages with continuous interpretation of the data from  
20  
21 the outset.  
22  
23

24  
25 1) Transcription: interviews were audio-recorded using an encrypted audio recorder and transcribed  
26  
27 verbatim by an independent, experienced transcriber. Transcripts were checked against audio  
28  
29 recorders, were anonymised and pseudonyms attributed. 2) Familiarisation with data: transcripts  
30  
31 and field notes were read and re-read with analytical notes, thoughts and impressions recorded  
32  
33 freehand. 3) Generating initial codes: transcripts were read line by line and initial codes applied. TC,  
34  
35 CG and CRM coded a sample of transcripts (n=3). A data analysis workshop was then held to discuss  
36  
37 codes and their labels. TC and CG coded a further 3 transcripts followed by a second analysis  
38  
39 workshop before CG coded the remaining interviews. 4) Searching for themes: codes were then  
40  
41 sorted into themes and sub-themes by CG and an initial thematic map generated and 5) Reviewing,  
42  
43 defining and naming themes: themes were data driven, identified at a semantic level within the  
44  
45 realist paradigm. A further analysis workshop was held between TC, CG and CRM to discuss the  
46  
47 themes, sub-themes and the relationships between them, while also interrogating the data between  
48  
49 cases. Refinements were made and CG revisited the transcripts to determine if themes and sub-  
50  
51 themes were an accurate representation of the data. NVIVO was used to manage the data.  
52  
53  
54  
55  
56  
57  
58  
59  
60

1  
2  
3 Analysis indicated that groups of cases (individuals) existed and it was possible to develop a  
4 typology. A typology provides a useful way of describing groups of individuals with different clusters  
5 of behaviours, values or attitudes. Kluge's[17] four stage process of construction of empirically  
6 grounded types was followed. Stage 1; 'development of relevant analysing dimensions' – was  
7 achieved through the thematic analysis described above; here 'dimensions' are themes and sub-  
8 themes. Stage 2; 'grouping of cases and analysis of empirical regularities' – individual cases were  
9 compared and contrasted and their position within the themes and sub-themes determined. Stage  
10 3; 'analysis of meaningful relations and type construction' – relationships between the themes of the  
11 groups were analysed and heterogeneity between groups checked, i.e. sufficient variation in data  
12 existed between the groups. Stage 4; 'characterisation of the constructed types' – through an  
13 iterative process, including discussion with the wider research team, the final typology of PA  
14 maintenance was characterised.

15  
16  
17  
18  
19  
20  
21  
22  
23  
24  
25  
26  
27  
28  
29  
30  
31  
32  
33  
34  
35  
36  
37  
38  
39  
40  
41  
42  
43  
44  
45  
46  
47  
48  
49  
50  
51  
52  
53  
54  
55  
56  
57  
58  
59  
60

Critical reflection was practiced throughout, and peer de-briefing was used to explore researcher bias.

## 2.5 Patient and public involvement

Patients and carers were involved in the conception of this study which forms part of a National Institute for Health Research post-doctoral fellowship. They reviewed the letters of invitation, patient information sheets and consent forms and suggested amendments. Patients and carers will also be involved in the dissemination of results, supporting the writing of a participant report and using their networks to disseminate results to wider patient communities.

## 3. RESULTS

### 3.1 Characteristics of respondents

Letters of invitation were sent to 124 individuals who had previously completed one of the four aforementioned programmes. A total of 48 reply slips were returned; yielding a response rate of

39%. Three individuals were found to be ineligible (no diagnosis of GI cancer) and seven could not be contacted. To ensure variation in the sample purposive sampling of the 38 viable responses was employed considering age, sex, socio-economic status and level of PA. Twenty-seven individuals were selected for interview.

Participant demographics are described in Table 2. Just over half of the sample were male with an average age of 66.3 years, all were white British. The majority (89%) were married and owned their own home (93%), 56% were retired.

**Table 2: Demographic characteristics**

|                                                          |                    |
|----------------------------------------------------------|--------------------|
| <b>N = 27</b>                                            |                    |
| Male                                                     | 15 (56%)           |
| Age (mean/range)                                         | 66.3 years (41-79) |
| Cancer type                                              |                    |
| Colorectal                                               | 23 (85%)           |
| Oesophageal                                              | 3 (11%)            |
| Stomach                                                  | 1 (4%)             |
| Previous programme (N)                                   |                    |
| ASCOT                                                    | 15 (56%)           |
| ENCOURAGE                                                | 4 (15%)            |
| Active Everyday                                          | 2 (7%)             |
| Move More Northern Ireland                               | 6 (22%)            |
| Ethnicity                                                |                    |
| White European                                           | 27 (100%)          |
| Marital Status                                           |                    |
| Married                                                  | 24 (89%)           |
| Living with partner                                      | 1 (4%)             |
| Single                                                   | 1 (4%)             |
| Divorced/separated                                       | 1 (4%)             |
| Employment                                               |                    |
| Full time                                                | 5 (18.5%)          |
| Part time                                                | 5 (18.5%)          |
| Retired                                                  | 15 (56%)           |
| Volunteering                                             | 2 (7%)             |
| Accommodation                                            |                    |
| Owner occupied                                           | 25 (93%)           |
| Rented housing                                           | 2 (7%)             |
| Caring responsibilities for adult                        | 4 (15%)            |
| Education                                                |                    |
| More than secondary education, e.g. undergraduate degree | 12 (44%)           |

### 3.2 Thematic analysis results

Seven themes were identified, each is set out below with exemplar quotes presented in Table 3.

Disease processes:

Participants described the processes of disease, both cancer and comorbidities, and the role this played in relation to their PA participation.

*Disease limits activities.*

For some, late effects of cancer treatment inhibited engagement in certain activities. Limitations as a result of a stoma were described, for example, avoiding activities that involved bending, or swimming due to issues of body esteem and concerns about bag leakage. Some also experienced bowel urgency and described avoiding certain activities where toilet facilities were unavailable, as well as adapting activities due to concerns about leaks or accidents.

Other comorbidities/ill health impacted PA participation, including arthritic conditions and back problems. Chronic obstructive pulmonary disease, asthma and breathlessness were reported to restrict walking outside, particularly in cold weather. More acute periods of illness or injury were also described including cough/colds and muscle/joint strains which interrupted PA participation.

*PA to improve comorbidities/late effects of cancer.*

In contrast, PA was also described as essential in maintaining good health and well-being, avoiding illness and physical deterioration, and was a key motivating factor for ongoing participation.

Participants also recalled the role of PA in alleviating late effects of cancer treatment, for example,

Table 3: Themes, sub-themes and accompanying quotes

| Theme                                | Sub-theme                                          | Quote                                                                                                                                                                                                                                                                                                                                                                                                                                                                                                                                                                                                                                                                                                                                                                                                                                                                                                                      |
|--------------------------------------|----------------------------------------------------|----------------------------------------------------------------------------------------------------------------------------------------------------------------------------------------------------------------------------------------------------------------------------------------------------------------------------------------------------------------------------------------------------------------------------------------------------------------------------------------------------------------------------------------------------------------------------------------------------------------------------------------------------------------------------------------------------------------------------------------------------------------------------------------------------------------------------------------------------------------------------------------------------------------------------|
| Disease processes                    |                                                    |                                                                                                                                                                                                                                                                                                                                                                                                                                                                                                                                                                                                                                                                                                                                                                                                                                                                                                                            |
|                                      | Disease limits activities                          | <p><i>"I used to go swimming but, I don't want to go swimming now because, I don't want to be in changing rooms where I've suddenly got to change the bag and the bag's wet and all--- because, I have a--- a hernia -- I don't want to be wearing swimming costumes with a kind of lump there, you know, a bag lump and a body lump".</i> Female, ASCOT</p> <p><i>I ought to get more active. I mean, me sister's offered me to. She said: "oh, yeah", you know: "I--- I go swimming every Tuesday, come with me". But, I can't think of anything more frightening than if I was taken short in a [swimming pool]... Female, Active Everyday</i></p> <p><i>I used to have a treadmill up to about six months ago and, I was on that most days. Every third day at least. But my balance isn't very good because I had a trapped spinal cord....I half regret getting rid of that... Female, Active Everyday</i></p>       |
|                                      | PA to improve comorbidities/late effects of cancer | <i>After I'd, you know, got into the--- the gym after the exercise very quickly, my condition was transformed beyond all recognition. You know, and that--- that was the motivation for keeping it up because I saw what it did for me and, I felt much better. My mobility was much improved and the pain levels had disappeared. I mean, I was on constant pain relief. I was taking Naproxen and Co-codamol. Both. Sort of three or four times a day. Once I'd started into a gym, I was taking none.</i> Male, Move More                                                                                                                                                                                                                                                                                                                                                                                               |
| The role of ageing                   |                                                    |                                                                                                                                                                                                                                                                                                                                                                                                                                                                                                                                                                                                                                                                                                                                                                                                                                                                                                                            |
|                                      | Age inhibiting PA                                  | <i>I still do me walks but, I don't do nothing like play any--- any sport or anything. (laughing) It's a bit much at sixty-nine, I think, you know.</i> Male, ASCOT                                                                                                                                                                                                                                                                                                                                                                                                                                                                                                                                                                                                                                                                                                                                                        |
|                                      | PA to combat ageing                                | <p><i>If you're fit and healthy obviously it helps, I should think. And, you're not--- you're not sitting around and becoming a burden to everyone else. So, this is obviously what we both want to avoid. So, yeah, that's--- that's probably the reason behind it [engaging in regular PA] and a fulfilling life, I suppose, and not being a--- a burden on anybody for as long as possible (laughing). Up to one-hundred-and-ten at least (laughter).</i> Male, ASCOT</p> <p><i>When I look at my father-in-law he's--- he's--- muscle waste. He's got no strength anywhere. Obviously, arthritis doesn't help. But, I want to make sure I've got the fitness and ability to be able to do more than him when--- as I go--- go through my older ages. So, that's the one that really sort of kicked in with me and that's why I do cycling and I've got quite strong legs from the running as well.</i> Male, ASCOT</p> |
| Emotion and psychological well-being |                                                    |                                                                                                                                                                                                                                                                                                                                                                                                                                                                                                                                                                                                                                                                                                                                                                                                                                                                                                                            |
|                                      | Psychological well-being                           | <p><i>"It takes--- you know, you're--- you're not thinking about that ache, that pain and what's going to happen in the future"</i> Male, ENCOURAGE</p> <p><i>"But, you know, if--- I think, it's kind of--- it gives you a bit more power, doesn't it? --- your power's been taken away from you in that treatment time but--- and then you want it back. So, you think, so, I'm taking this back."</i> Female, ASCOT</p>                                                                                                                                                                                                                                                                                                                                                                                                                                                                                                 |
|                                      | Low mood and motivation                            | <p><b>INT:</b> <i>So, going back to you using the exercise bike. Can you pinpoint what it was that stopped you doing that?</i></p> <p><b>RESP:</b> <i>....I got to a stage and I'd think: "why am I bothering?". I think--- I'm getting to a bit of a--- down in the dumps stage. I think: "why am I bothering?". I'm seventy--- seventy-something. I'm seventy-six or whatever. And why should I bother? You know, because I've not got much longer to life. I think, I went through a stage like that.</i> Female, ASCOT</p>                                                                                                                                                                                                                                                                                                                                                                                             |

|                                     |                       |                                                                                                                                                                                                                                                                                                                                                                                                                                                                                                                                                                                                                                                                                                                                                                                                                                                                                                                                                                                                                                                    |
|-------------------------------------|-----------------------|----------------------------------------------------------------------------------------------------------------------------------------------------------------------------------------------------------------------------------------------------------------------------------------------------------------------------------------------------------------------------------------------------------------------------------------------------------------------------------------------------------------------------------------------------------------------------------------------------------------------------------------------------------------------------------------------------------------------------------------------------------------------------------------------------------------------------------------------------------------------------------------------------------------------------------------------------------------------------------------------------------------------------------------------------|
|                                     |                       | <i>You go for a walk around the block and once you've been around the block once, you're bored with it. So, then you drive out somewhere and have a walk around and then you run out of places to drive up to and you just can't be bothered. Male, ASCOT</i>                                                                                                                                                                                                                                                                                                                                                                                                                                                                                                                                                                                                                                                                                                                                                                                      |
| Incorporating PA into everyday life |                       |                                                                                                                                                                                                                                                                                                                                                                                                                                                                                                                                                                                                                                                                                                                                                                                                                                                                                                                                                                                                                                                    |
|                                     | Incidental activities | <i>I'm pretty active anyway. I mean, I don't--- I don't like sitting about too much. I always find something to do. Male, ASCOT</i>                                                                                                                                                                                                                                                                                                                                                                                                                                                                                                                                                                                                                                                                                                                                                                                                                                                                                                                |
|                                     | Planned activities    | <i>"Yeah. Yeah. They [Nordic walking sessions] were sacrosanct. You know, they're in the diary. They're--- well, we have a calendar on our desk and my walks are all written in there." Female, ENCOURAGE</i>                                                                                                                                                                                                                                                                                                                                                                                                                                                                                                                                                                                                                                                                                                                                                                                                                                      |
| Social interaction                  |                       |                                                                                                                                                                                                                                                                                                                                                                                                                                                                                                                                                                                                                                                                                                                                                                                                                                                                                                                                                                                                                                                    |
|                                     | Avoiding isolation    | <i>INT: And so, it sounds like you get down to that session on a Tuesday as often as you can. What is it about that that keeps you going back week after week?<br/>RESP: I think, it's--- it's the company. Like, as a--- as a pensioner now, I wouldn't--- I wouldn't have much contact with other people other than the family. But it's--- it's the contact. It's getting out and--- and meeting the people which would be the driving force behind it. And as well as that, I enjoy the exercises. Male, Move More</i>                                                                                                                                                                                                                                                                                                                                                                                                                                                                                                                         |
|                                     | Friendship            | <i>Let's put it this way. When we walk our mouths work just as hard as our legs (laughter) so. And--- and you--- so, you can--- you tend to--- you know, you walk in pairs usually just because on tracks it'll often--- that will be, you know, the--- determined by the woods of the track. So, walking two-by-two is the usual and--- and you switch around. You know, that's the nice thing. You'll--- you'll be in different groups and you just happen to link up with somebody and you'll--- you'll have a good old chat as you go along. So, that's the social side bit which is lovely. Female, ENCOURAGE.</i>                                                                                                                                                                                                                                                                                                                                                                                                                            |
| Support and self-monitoring.        |                       | <i>Practice nurses with my GP that--- those sort of people lectured me for years about doing a bit more physical activity but they're not offering me anything.<br/><br/>We (Active Everyday trainer) talked about whether or not--- you know, even when I was younger, I would have played any sport or done anything like that. We--- we had a general conversation and that's--- that as far as I know is a big part of their role. Is to fit people in with things that they feel you'd be capable of doing because if you weren't capable of doing it you're not going to stick at it. Female, Move More<br/><br/><b>INT: And so, you talked about buying a Fitbit. How do you find that impacts on what you're doing?</b><br/><b>RESP: Well, it's great because--- you know, say I'd got to about mid-afternoon, we're not doing anything and I've only done five thousand steps, I know it's time for a walk. You know, that sort of thing. So, no, I use it as a guide and as a--- as a recorder really as well. Female, Move More</b></i> |
| Competing demands                   |                       | <i>And then--- then we had--- because my husband's an only child, my mother-in-law's got dementia and we were having to look after her and, you know, we had all the worry after--- and after she died, clearing the house. So, it's all sort of fell by the wayside, my exercise regime, really which is a shame. But, I was--- so, I would say for two years, I wasn't sort of doing what I had been doing before when the trial was on. But, I'm trying to gradually get back now. Female, ASCOT<br/><br/><i>So, me cycling, I do every Wednesday, Thursday and Friday and that would be cycling over to pick the grandchildren up. Take them home from school. Look after them for a little while. And then bring them--- then come home myself on my bike rather than jump in the car. Male, ASCOT</i></i>                                                                                                                                                                                                                                    |

1  
2  
3 exercising daily to improve gut mobility and bowel habit. PA was also reported as important to  
4  
5 manage other conditions such as Type II diabetes, avoiding weight gain/promoting weight loss and  
6  
7 alleviating joint stiffness caused by arthritic conditions. For one participant, engaging in regular PA  
8  
9 revolutionised the way he managed chronic back pain (see Table 3).  
10  
11  
12  
13  
14

#### 15 The role of ageing

16  
17 Factors related to ageing were frequently referenced in relation to PA participation.  
18  
19  
20  
21

#### 22 *Ageing perceived as inhibiting PA.*

23  
24 In some cases, advancing age was cited as a barrier to engaging in PA. Modification to activities were  
25  
26 described such as using the bus rather than walking, as well as a process of 'slowing down', which in  
27  
28 some cases was associated with retirement. Some perceived that more structured exercise was not  
29  
30 appropriate for older adults.  
31  
32  
33  
34

#### 35 *PA to combat consequences of ageing.*

36  
37 In contrast participation in PA was also reported to be important to preserve fitness and mobility  
38  
39 and slow the physical decline associated with ageing. It was felt that regular exercise helped to  
40  
41 ensure a future where the individual can engage in activities they enjoy and honour commitments to  
42  
43 family and loved ones for as long as possible. Maintaining independence and avoiding burdening  
44  
45 others was also important to some participants. Comparisons were also made to older relatives who  
46  
47 they had witnessed decline in health and a desire to avoid such reductions in mobility and  
48  
49 independence were expressed.  
50  
51  
52  
53  
54  
55

#### 56 Emotion and psychological well-being

57  
58  
59  
60

1  
2  
3 The association between PA and psychological well-being and emotion was commonly described, both  
4  
5 in a facilitative and deleterious way.  
6  
7  
8  
9

10 *Psychological well-being.*

11  
12 Participants who engaged regularly in PA frequently described enjoying the activities as well as  
13  
14 feeling a positive impact on psychological well-being. In some instances, PA also acted as a  
15  
16 distraction from concerns about their health and alleviated anxieties. Others spoke of feeling  
17  
18 empowered by taking exercise, using it as a vehicle to take control over their health following their  
19  
20 cancer diagnosis and treatment.  
21  
22  
23  
24  
25

26 *Low mood, low motivation and lack of enjoyment.*

27  
28  
29 For others feelings of low mood accompanied apathy and impacted on motivation leading to a  
30  
31 reduction in activity levels. Boredom was also expressed with some participants struggling to find  
32  
33 ways to increase their activity level in a manner that interested them and they enjoyed.  
34  
35  
36  
37  
38

39 *Incorporating PA into everyday life*

40  
41 Participants described a variety of ways in which they incorporated PA into their lives.  
42  
43

44 *Incidental activities.*

45  
46  
47 Typically, individuals who participated in little or no structured exercise described a desire to avoid  
48  
49 long periods of sitting. Participants recalled engaging in incidental activities such as domestic chores  
50  
51 and gardening as a means of staying active.  
52  
53

54 *Planned activities.*

55  
56  
57 For some, engagement was structured, organised and part of their routine, such as attending regular  
58  
59 exercise classes or active commuting. Participants expressed commitment to these activities and for  
60



1  
2  
3 some engagement was a priority. Others describe periods of increased PA engagement, for example  
4  
5 during the PA programme or prompted by other factors such as a desire to lose weight, which  
6  
7 subsequently reduced or stopped. Some participants describe how they re-engaged in activities  
8  
9 weeks, months or even years later.  
10  
11  
12  
13  
14

#### 15 16 Social interaction

17  
18 Engagement in PA provided an important opportunity to socialise.  
19

#### 20 21 *Avoiding isolation.*

22  
23  
24 For some individuals living alone and/or who were retired, attending exercise classes provided an  
25  
26 opportunity to meet with others and socialise, reducing feelings of isolation.  
27  
28

29  
30 *Friendship:* Others talked about how participation in PA presented opportunities to develop  
31  
32 meaningful and long-lasting friendships with those they exercised with. For those participants  
33  
34 engaging in regular PA was an opportunity to spend time with friends and acted as a motivation to  
35  
36 continued engagement.  
37  
38  
39  
40  
41

#### 42 Support and self-monitoring

43  
44  
45 For some participants continued engagement in PA was facilitated by personalised support. This was  
46  
47 described by individuals who had previously engaged in regular exercise prior to cancer diagnosis, as  
48  
49 well as those who were novices. The one-to-one specialised support provided during involvement in  
50  
51 a PA promotion programme helped individuals find activities they enjoyed and were appropriate for  
52  
53 them, enabling continued participation. For example, one participant described how a practice nurse  
54  
55 'lectured' her about taking more exercise with little effect. However, following a consultation with  
56  
57  
58  
59  
60

1  
2  
3 the Active Everyday practitioner, she was able to find an activity that suited her needs, and which  
4  
5 she had engaged in weekly for more than 2 years. See Table 3 for quotes.  
6  
7  
8  
9

10 Self-monitoring techniques were important for some. The use of technology to monitor activity,  
11  
12 particularly steps per day, was described as useful. Participants in the ASCOT trial were asked to  
13  
14 wear a pedometer at the beginning of the study. Some reported that they were surprised at how  
15  
16 few steps there were doing at baseline, and this provided motivation for change. Some continued to  
17  
18 use a device to measure their steps, setting a goal, such as walking 10,000 steps a day and regularly  
19  
20 self-monitoring their behaviour.  
21  
22

23  
24 Further, despite ensuring no advice/recommendations to increase activity were made during the  
25  
26 interviews some described their participation in the current study as acting as a prompt to consider  
27  
28 re-engaging with PA.  
29  
30  
31  
32

### 33 Competing demands

34  
35 Responsibilities such as caring for family members, family commitments and work schedules made  
36  
37 consistent and continued engagement in PA challenging for some. Others were able to use these  
38  
39 commitments as an opportunity to increase their activity levels. For example, playing with  
40  
41 grandchildren and active commuting.  
42  
43  
44  
45

### 46 Typology

47  
48  
49 From these findings describing experiences, barriers and facilitators to long-term PA engagement it  
50  
51 was possible to generate a typology consisting of three multidimensional types “maintained PA”,  
52  
53 “intermittent PA” and “low activity”. This typology, informed by the themes identified, characterises  
54  
55 the varied experiences of our sample helping to expand our understanding of factors that influence  
56  
57  
58  
59  
60

1  
2  
3 an individual's success, or not, of incorporating regular PA into their everyday lives (see Table 4 for  
4 characteristics by type and accompanying vignettes).  
5  
6  
7

8 The first type is "*Maintained PA*" (see Figure 1.1). Participants described themselves as routinely  
9 active, most often engaging in structured moderate and/or vigorous PA at regular times/days.  
10 Examples include attending the gym, Nordic walking and group exercise classes. Some had  
11 participated in regular PA at other periods of life and the PA intervention supported them to re-  
12 engage with these activities. Others established new routines following participation. The defining  
13 features of this group include finding enjoyment and pleasure in regular PA which is planned and  
14 prioritised. Physical and psychological benefits of regular PA in preserving health, mobility and  
15 independence were described and highly valued. Interruptions to activity tended to be brief and  
16 resuming activity was not problematic or effortful. PA as a means of socialisation was important for  
17 some but not all in this type.  
18  
19  
20  
21  
22  
23  
24  
25  
26  
27  
28  
29

30  
31 The second type is "*Intermittent PA*" (see Figure 1.2). Participants in this type described irregular  
32 engagement in structured PA, often resulting in cycles of action and inaction. For example, starting  
33 an exercise class or purchasing new exercise equipment, participating regularly for a period of time  
34 and then subsequently experiencing an interruption to that behaviour. Typically, these participants  
35 discussed the known benefits of exercise and described taking part because 'they should', often  
36 expressing extrinsically driven motivations such as a desire to lose weight. Reasons for interruptions  
37 to PA participation varied and included intrinsic factors, for example, boredom or low mood and  
38 extrinsic factors, such as a stressful event, ill health or caring responsibilities. Once these barriers  
39 were no longer relevant participants often found it difficult to re-engage due to a lack of  
40 motivation/apathy. This group also described deriving less pleasure and intrinsic reward from  
41 engaging in PA than those in the maintained PA type.  
42  
43  
44  
45  
46  
47  
48  
49  
50  
51  
52  
53  
54

55  
56 The third and final type described is "*Low activity*" (see Figure 1.3). Participants in this group take  
57 part in little or no structured PA but do describe avoiding long periods of sedentary time by engaging  
58  
59  
60

1  
2  
3 in activities of low intensity such as jobs around the home. Reference is also made to incidental  
4  
5 activities such as climbing stairs in the home which are felt to maintain mobility and fitness levels. As  
6  
7 with the maintained PA type, the importance of PA to maintain mobility was discussed with those in  
8  
9 the lower activity type feeling this was achieved with lower intensity activities such as walking and  
10  
11 household chores. Levels of PA participation were felt to be appropriate for their age and perceived  
12  
13 capability. Reference was also made to reductions in activity levels compared to earlier in the life.  
14  
15 Some are content with this and attribute it as a natural consequence of ageing. Others had to stop  
16  
17 or adapt activities less willingly as a result of comorbidities and/or consequences of cancer  
18  
19 treatment. Comparisons were also made to others of a similar age with participants evaluating their  
20  
21 activity levels to be higher than their peers. Those in the low activity group describe being able to  
22  
23 carry out necessary activities of daily living and infrequently express a desire to engage in additional  
24  
25 PA. Demographic characteristics of individuals by type (see Table 4) show those in the low activity  
26  
27 group to be slightly older than those in the other types. There was variation in original intervention  
28  
29 participation across all 3 types.  
30  
31  
32  
33  
34  
35  
36  
37

#### 38 **4. DISCUSSION**

39  
40  
41 This study provides the first published insight into the experiences of sustaining long-term PA  
42  
43 behaviour change following participation in a PA promotion programme among people LWB  
44  
45 gastrointestinal cancer. Seven key themes were identified, presenting key factors that promote or  
46  
47 inhibit regular participation in PA; disease processes, impact of ageing, emotions and psychological  
48  
49 well-being, incorporating PA into everyday life, social interaction, competing demands support and  
50  
51 self-monitoring. Additionally, a novel typology was developed to include three types; maintained PA,  
52  
53 intermittent PA and low PA.  
54  
55

56  
57 Characteristics of the “maintained PA” type where participation in PA is regular and sustained, are  
58  
59 comparable to findings from a systematic review and meta-synthesis of the acceptability of PA  
60

1  
2  
3 interventions in older adults[18]. This review included evidence from studies of older adults ( $\geq 65$   
4 years old) from non-clinical populations. The authors described the importance of fun and  
5 enjoyment as a motivator for engagement, as well as descriptions of functional and psychosocial  
6 improvements, related to PA participation which increase perceived value of participation, and  
7 consequently enacted behaviour. Devereux-Fitzgerald et al. include the two factors of 'enjoyment'  
8 and 'value' as central to their analytic model describing PA behaviour as seen in the 'maintained PA'  
9 type[15]. The enjoyment of social interaction (as well as of PA participation in and of itself) was also  
10 a common theme in the published literature captured in this review and supported in part by the  
11 current study. However, social support was not a universal facilitator of continued PA engagement.  
12 Other reviews have challenged this assumption that social support is a key facilitator to engagement  
13 in PA, reporting it to be important for some but not all[19-20].

14  
15  
16 In one of the few qualitative studies investigating long-term PA behaviour in people LWBC,  
17 Midtgaard et al.[21] interviewed individuals who had participated in the Copenhagen PACT study, a  
18 12 month programme to promote PA after cancer. Those interviewed described the importance of  
19 prioritising PA and planning ahead to ensure regular engagement. They also described exercise as a  
20 prerequisite for 'feeling and staying well'. However, as others have argued[18], a focus solely on the  
21 role of PA for long-term health is unlikely to encourage long-term participation of many older adults.  
22 This argument is in keeping with the current study whereby the majority of participants describes  
23 knowledge of the value of PA for health but do not necessarily participate regularly.

1  
2  
3  
4  
5  
6  
7  
8  
9  
10  
11  
12  
13  
14  
15  
16  
17  
18  
19  
20  
21  
22  
23  
24  
25  
26  
27  
28  
29  
30  
31  
32  
33  
34  
35  
36  
37  
38  
39  
40  
41  
42  
43  
44  
45  
46

**Table 4 Participant characteristics by type.**

| Type                     | Age                | Sex             | Retired % (n) | More than secondary education | Vignette                                                                                                                                                                                                                                                                                                                                                                                                                                                                                                                                                                                                                                                                                                                                                                                                                                                                                                                                                                                                                                                                                                                                                                          |
|--------------------------|--------------------|-----------------|---------------|-------------------------------|-----------------------------------------------------------------------------------------------------------------------------------------------------------------------------------------------------------------------------------------------------------------------------------------------------------------------------------------------------------------------------------------------------------------------------------------------------------------------------------------------------------------------------------------------------------------------------------------------------------------------------------------------------------------------------------------------------------------------------------------------------------------------------------------------------------------------------------------------------------------------------------------------------------------------------------------------------------------------------------------------------------------------------------------------------------------------------------------------------------------------------------------------------------------------------------|
| Maintained PA<br>N = 13  | 41-79<br>Mean 65.4 | F = 43% (n = 6) | 57% (8)       | 35% (n = 5)                   | <p>Prior to cancer diagnosis Jean enjoyed regular participation in Nordic walking. She has enjoyed sport/physical activity throughout life but participated less during working life. She describes a sense of calm leading into her operation as she felt she had done all she could to optimise her health through the ENCOURAGE trial. She talks with passion of the importance of continued regular exercise for her health, wanting to be fit enough to enjoy life with her family and grandchildren and champions others to be active, as well as regular exercise giving her a sense of physical and mental wellbeing.</p> <p>Jean talks about having more time to prioritise exercise in her retirement and states that exercise is at the top of her to-do list each week. Exercise sessions are scheduled into her diary in advance each week and are frequently prioritised over other activities.</p> <p>Jean talks about a love of the outdoors and being active with a particular passion for Nordic walking.</p> <p>Jean walks regularly with a group and enjoys the social element with lasting friendships with other group members. Female, ENCOURAGE trial</p> |
| Intermittent PA<br>N = 5 | 60-76<br>Mean 65.8 | F = 40% (n = 3) | 20% (1)       | 60% (n=3)                     | <p>Sue talks about the importance of physical activity to maintain health and describes its importance due to being overweight and experiencing a myocardial infarction.</p> <p>Sue describes periods where she exercised regularly but is currently inactive and says 'I know I should do more'.</p> <p>Following completion of cardiac rehabilitation Sue purchased a stationary exercise bike, the intention was to use it every day which she reports doing for a few weeks before stopping.</p> <p>Sue describes a lack of enjoyment and little change in weight after using her stationary bike. She describes having low mood and a lack of motivation to continue.</p>                                                                                                                                                                                                                                                                                                                                                                                                                                                                                                    |

|                       |                    |                 |         |           |                                                                                                                                                                                                                                                                                                                                                                                                                                                                                                                                                                                                                                                   |
|-----------------------|--------------------|-----------------|---------|-----------|---------------------------------------------------------------------------------------------------------------------------------------------------------------------------------------------------------------------------------------------------------------------------------------------------------------------------------------------------------------------------------------------------------------------------------------------------------------------------------------------------------------------------------------------------------------------------------------------------------------------------------------------------|
|                       |                    |                 |         |           | Sue also talks about regaining weight she had lost which makes walking and exercising uncomfortable, also reducing her motivation to exercise. Female, ASCOT trial                                                                                                                                                                                                                                                                                                                                                                                                                                                                                |
| Low Activity<br>N = 8 | 61-76<br>Mean 68.4 | F = 50% (n = 4) | 75% (6) | 50% (n=4) | Roy describes the presence of a stoma bag 'slowing him down' and engaging in less activity since his retirement<br>He describes actively seeking opportunities to avoid long periods of sitting and undertakes tasks in and around the home.<br>Roy perceives himself to be sufficiently active compared to others of a similar age.<br>Roy talks about walking to get the paper each day but feels more structured exercise is not appropriate for his age.<br>He also talks about enjoying being able to help family members but completing jobs around the house and does not desire to increase activity levels further.<br>Male, ASCOT trial |

For peer review only

1  
2  
3  
4  
5  
6  
7  
8  
9  
10  
11  
12  
13  
14  
15  
16  
17  
18  
19  
20  
21  
22  
23  
24  
25  
26  
27  
28  
29  
30  
31  
32  
33  
34  
35  
36  
37  
38  
39  
40  
41  
42  
43  
44  
45  
46

1  
2  
3 Barriers identified in this study are consistent with those reported in the existing literature. A recent  
4 review of barriers and facilitators to exercise in people LWBC by cancer highlighted health problems,  
5 work and home responsibilities and lack of motivation as key barriers to engagement[11]. Others  
6 describe the deleterious effect of older age, physical decline and lack of time[19,22]. Although most  
7 studies in these reviews focused on adoption of PA rather than maintenance, the few studies that do  
8 consider long-term behaviour revealed similar obstacles. Brunet et al.[23] interviewed women with a  
9 previous diagnosis of breast cancer regarding maintenance of self-directed PA following  
10 participation in an intervention. Physical barriers were common, including arthritis and long-term  
11 effects of cancer treatment, such as fatigue as well as a lack of motivation and work and caring  
12 responsibilities. Similarly, in a study exploring experiences of PA over 5 years since diagnosis,  
13 Hefferon et al.[24] reported lack of motivation and apathy as well as the deleterious effects of the  
14 ageing process and co-morbidities and practical barriers such as proximity to exercise facilities and  
15 competing priorities as prohibitive to regular long-term PA engagement.

16  
17  
18  
19  
20  
21  
22  
23  
24  
25  
26  
27  
28  
29  
30  
31  
32  
33 When considering the "intermittent PA" type with cycles of action and inaction, it is helpful to  
34 consider theories of motivation and behaviour change that may help to explain this phenomenon.  
35  
36  
37  
38  
39  
40  
41  
42  
43  
44  
45  
46  
47  
48  
49  
50  
51  
52  
53  
54  
55  
56  
57  
58  
59  
60  
Kwasnicka et al.[25] present a systematic review of behaviour theories with a focus on maintenance  
of behaviour change and identify five key themes of which self-regulation is one. They propose that  
individuals differ in their ability to self-regulate their behaviour and those with lower self-regulatory  
capacity may have weaker intention-behaviour relationships (pg 285). It is suggested that when a  
behaviour falls short of a relevant goal, for example an individual does not attend an exercise class  
as planned, the individual must then exert more cognitive effort to 'correct' this behaviour and bring  
about satisfaction of goal achievement, or they disengage with the goal. At this stage the new  
behaviour is effortful, requiring significant self-regulation. Kwasnicka et al.[25] describe self-  
regulation as a limited cognitive resource which can be depleted through things such as stress and  
illness, and our self-regulatory reserves fluctuate throughout life. Habit formation has been  
proposed as a strategy to support behaviour maintenance [26]. Habit is a process whereby a cue



1  
2  
3 triggers an impulse to act because a mental association has been learned between a cue and an  
4 action[27,28]. Habits can support maintenance of behaviour because they are controlled through an  
5  
6 associative reflexive system, as opposed to an information-processing system[29], meaning they  
7  
8 continue to guide behaviours even when self-regulatory resources are low. Habit formation  
9  
10 however can be a long process[30] and maintaining motivation for long enough to develop strong  
11  
12 habits can be challenging, therefore long-term behaviour change will only be achieved once the  
13  
14 behaviour is habitual, requiring less conscious control. These suggested mechanisms bear many  
15  
16 similarities to the narratives presented by those in the intermittent activity type. It is also proposed  
17  
18 that motives for sustained behaviour must bring about regular gratification and will be more  
19  
20 successful if they are intrinsic, such as the enjoyment described by those in the 'maintained MVPA'  
21  
22 type in this study.  
23  
24  
25  
26

27  
28 A number of the components of the 'low activity' type, characterised by engagement in little or no  
29  
30 structured PA, share similarities with evidence from a recent review by McGowan and colleagues  
31  
32 who conducted a systematic review and meta-synthesis of the acceptability of PA to older  
33  
34 adults[31]. They synthesised the evidence for community-dwelling older adults who had not been  
35  
36 involved in PA interventions and were therefore not necessarily active or willing to be active. They  
37  
38 describe how older adults in these studies interpreted PA as a 'by-product' of other activities and a  
39  
40 perception that more structured and purposeful PA wasn't necessary or appropriate for them.  
41  
42 Similar concepts were described in a review of factors influencing PA participation in people with a  
43  
44 diagnosis of lung cancer with 'usual activities' preferred over structured exercise[22].  
45  
46  
47  
48  
49  
50  
51

### 52 **Implications for practice and future research**

53

54  
55 Findings from this study have important implications for practice. In addition to providing novel data  
56  
57 of the experiences of maintenance of PA behaviour change in PLWB gastrointestinal cancer, generation  
58  
59 of the unique typology argues for targeted interventions to support long-term behaviour change  
60

1  
2  
3 rather than a 'one size fits all' approach. Participants from all four PA programmes were represented  
4  
5 in the three types described here demonstrating successful (or not) behaviour change was not  
6  
7 limited to one approach. Those who have a history of exercising and/or who find activities that bring  
8  
9 them pleasure and who hold strong values of the importance of PA will likely need minimal support  
10  
11 to sustain engagement. In contrast individuals who experience cycles of success and failure of  
12  
13 engagement need further support with self-regulatory process. More frequent contacts may help  
14  
15 them identify appropriate activities, develop action plans and problem solve when they face  
16  
17 challenges. However further research is needed to determine how best to support individuals to  
18  
19 self-regulate independently when they experience recurrent cycles of action and inaction in order to  
20  
21 prevent reliance on external support.  
22  
23

24  
25  
26 Raising awareness of the importance and relevance of PA that goes beyond participating in  
27  
28 incidental and daily activities is necessary in the low activity type. They may also require support to  
29  
30 alter their self-identity, to see participation in PA as an appropriate behaviour for them, which may  
31  
32 also be facilitated by alteration of social norms. They are likely to need further support to find  
33  
34 activities appropriate to their physical capabilities, considering comorbidities and long-term  
35  
36 consequences of cancer. True for all is the importance of finding activities that are meaningful and  
37  
38 enjoyable.  
39  
40

41  
42 A priority for future research is therefore to develop processes which can identify these key  
43  
44 characteristics and determine the most appropriate support. Lastly, the striking similarities between  
45  
46 themes presented here and those in the wider literature, particularly among clinical and non-clinical  
47  
48 populations of older adults, suggests conclusions and therefore recommendations may be  
49  
50 appropriate to other cancer types and non-cancer populations.  
51  
52

### 53 **Strengths and limitations**

54  
55  
56  
57 Inclusion of a mixed sample consisting of men and women with variation in current activity levels  
58  
59 and age is a strength of this study. However, transferability is reduced by the absence of any non-  
60

1  
2  
3 white participants, and the vast majority were married or co-habiting and most owning their own  
4 home suggesting financial security and a lack of socio-economic diversity despite attempts to  
5 maximise this during sampling. Furthermore, only 7 participants were classified as the 'low activity'  
6 type and therefore, despite our sampling strategy, are underrepresented in this study.  
7  
8  
9

10  
11  
12 It is also important to note that we present thematic descriptions of the data and higher-level  
13 conceptual models in the form of a typology. There are multiple causal mechanisms at play, often  
14 beyond the control of the individual which are not described in the typology presented here. Future  
15 work should look at mechanisms associated with these types and how these might inform the design  
16 of future PA promotion programmes. The authors also note that this typology sits within  
17 environmental and structural contexts which were not explored.  
18  
19  
20  
21  
22  
23  
24  
25  
26  
27  
28  
29

### 30 **Conclusions**

31  
32 People LWBC experience numerous challenges to sustaining increases in PA. These include cancer  
33 specific consequences such as presence of a stoma and issues with bowel habit, however many are  
34 similar to those described among non-cancer populations. The novel typology presented here  
35 supports the need for stratified approaches to long-term support for PA behaviour change. This  
36 approach is in keeping with emerging models of cancer care which call for personalised approaches.  
37 Future research should explore whether tailoring of interventions using these typologies produces  
38 better maintenance of PA.  
39  
40  
41  
42  
43  
44  
45  
46  
47  
48  
49  
50

51  
52 **CONTRIBUTIONS:** CG made substantial contributions to the conception, design, acquisition of data,  
53 analysis and interpretation of data for this study. CG drafted the manuscript and approved the final  
54 versions. CF made substantial contributions to the conception and design of the study,  
55 interpretation of the data, provided critical intellectual content and approved the final version. CRM  
56  
57  
58  
59  
60

1  
2  
3 made substantial contributions to the conception, design of the study, analysis and interpretation of  
4 the data, provided critical intellectual content and approved the final version. TC made substantial  
5 contributions to the data analysis and interpretation, provided critical intellectual content and  
6 approved the final version. BMP made substantial contributions to the conception of the design of  
7 the study, provided critical intellectual content and approved the final version. MM made substantial  
8 contributions to interpretation of the data, provided critical intellectual content and approved the  
9 final version. PL made substantial contributions to the acquisition of data, provided critical  
10 intellectual content and approved the final version of the manuscript. KB made substantial  
11 contributions of interpretation of the data provided critical intellectual content and approved the  
12 final version. All authors agree to be accountable for all aspects of the work.

13  
14  
15  
16  
17  
18  
19  
20  
21  
22  
23  
24  
25  
26 **Acknowledgement:** We would like to acknowledge the work of colleagues who assisted in the  
27 identification of participants to this study including Samantha Leggett (ENCOURAGE trial), Liam  
28 Humphreys (Active Everyday), Nuala McVeigh, Kelly Irwin, Eimear Hagan and Diarmaid McAuley  
29 from Move More Northern Ireland. Finally we would like to thank the participants for their time and  
30 invaluable contribution.

31  
32  
33  
34  
35  
36  
37  
38 **FUNDING:** This study was funded by a National Institute for Health Research (NIHR), Post-doctoral  
39 fellowship. The publication presents the independent research funded by the NIHR. The views  
40 expressed are those of the authors and not necessarily those of the NHS, the NIHR or the  
41 Department of Health and Social Care.

42  
43  
44  
45  
46  
47  
48 **Data Availability Statement:** Deidentified data are held by the corresponding author and available  
49 upon reasonable request assuming all necessary ethical approvals are in place.

50  
51  
52  
53  
54  
55  
56  
57  
58  
59  
60  
**CONFLICT OF INTEREST:** None to declare

1  
2  
3  
4  
5  
6  
7  
8  
9  
10  
11  
12  
13  
14  
15  
16  
17  
18  
19  
20  
21  
22  
23  
24  
25  
26  
27  
28  
29  
30  
31  
32  
33  
34  
35  
36  
37  
38  
39  
40  
41  
42  
43  
44  
45  
46  
47  
48  
49  
50  
51  
52  
53  
54  
55  
56  
57  
58  
59  
60

For peer review only

1  
2  
3 **FIGURE LEGENDS**  
4

5 **Figure 1.1: Maintained PA**  
6

7  
8 **Figure 1.2: Intermittent PA**  
9

10 **Figure 1.3: Low activity**  
11  
12  
13  
14  
15  
16  
17  
18  
19  
20  
21  
22  
23  
24  
25  
26  
27  
28  
29  
30  
31  
32  
33  
34  
35  
36  
37  
38  
39  
40  
41  
42  
43  
44  
45  
46  
47  
48  
49  
50  
51  
52  
53  
54  
55  
56  
57  
58  
59  
60

For peer review only

## REFERENCES

1. Campbell KL, Winters-Stone KM, Wiskemann J, et al. Exercise Guidelines for Cancer Survivors: Consensus Statement from International Multidisciplinary Roundtable. *Med Sci Sports Exerc.* 2019;51(11):2375-90. doi: 10.1249/MSS.0000000000002116.
2. Force ICT. Achieving world-class cancer outcomes: A strategy for England 2015-2020. 2015.
3. Blair SN, Morris JN. Healthy Hearts-and the Universal Benefits of Being Physically Active: Physical Activity and Health. *Annals of Epidemiology.* 2009;19(4):253-6. doi:10.1016/j.annepidem.2009.01.019
4. Grimmett C, Wardle J, Steptoe A. Health behaviours in older cancer survivors in the English Longitudinal Study of Ageing. *Eur J Cancer.* 2009;45(12):2180-6. doi: 10.1016/j.ejca.2009.02.024 [published Online First: 26 May 2009].
5. Turner RR, Steed L, Quirk H, et al. Interventions for promoting habitual exercise in people living with and beyond cancer. *Cochrane Database of Syst Rev.* 2018 Sept 19;9:CD010192. doi: 10.1002/14651858.CD010192.pub3
6. Roberts AL, Fisher A, Smith L, et al. Digital health behaviour change interventions targeting physical activity and diet in cancer survivors: a systematic review and meta-analysis. *J of Cancer Surviv.* 2017;11(6):704-719.. doi: 10.1007/s11764-017-0632-1. [published Online first: 4 Aug 2017].
7. Pinto B, Stein K, Dunsiger S. Peer mentorship to promote physical activity among cancer survivors: effects on quality of life. *Psychooncology.* 2015;24(10):1295-302. doi:10.1016/j.ejon.2017.06.006 [published Online First 10 Jul 2017].
8. Grimmett C, Corbett T, Brunet J, et al. Systematic review and meta-analysis of maintenance of physical activity behaviour change in cancer survivors. *Int J Behav Nutr Phys Act.* 2019;16(1):37. doi: 10.1186/s12966-019-0787-4.
9. Morey MC, Blair CK, Sloane, et al. Group trajectory analysis helps to identify older cancer survivors who benefit from distance-based lifestyle interventions. *Cancer.* 2015;121(24):4433-40. doi: 10.1002/cncr.29684. [published Online First: 29 Oct 2015].

- 1  
2  
3 10. Drury A, Payne S, Brady AM. Cancer survivorship: Advancing the concept in the context of  
4 colorectal cancer. *Enr J Oncol Nurs*. 2017;29:135-47. doi: 10.1016/j.ejon.2017.06.006. [published  
5 Online First: 10 Jul 2017].  
6  
7
- 8  
9  
10 11. Clifford BK, Mizrahi D, Sandler, et al. Barriers and facilitators of exercise experienced by  
11 cancer survivors: a mixed methods systematic review. *Supportive Care Cancer*. 2018;26(3):685-700.  
12 doi: 10.1007/s00520-017-3964. [published Online First: 28 Nov 2017].  
13  
14
- 15  
16 12. Lally P, Gardner B. Promoting habit formation. *Health Psychology Review*.  
17  
18 2013;7(sup1):S137-S58. [doi.org/10.1080/17437199.2011.603640](https://doi.org/10.1080/17437199.2011.603640). [published Online First: 11 Oct  
19 2011].  
20  
21
- 22  
23 13. Beeken RJ, Croker H, Heinrich M, et al. Study protocol for a randomised controlled trial of  
24 brief, habit-based, lifestyle advice for cancer survivors: exploring behavioural outcomes for the  
25 Advancing Survivorship Cancer Outcomes Trial (ASCOT). *BMJ Open*. 2016;6(11). doi:  
26 10.1136/bmjopen-2016-011646.  
27  
28
- 29  
30 14. Humphreys L, Crank H, Frith G, et al.. Bright spots, physical activity investments that work:  
31 Active Everyday, Sheffield's physical activity service for all people living with and beyond cancer.  
32 *British Journal of Sports Medicine*. 2019;53(13):837-8. [published Online First: 14 June 2019].  
33  
34
- 35  
36 15. Tong A, Sainsbury P, Craig J. Consolidated criteria for reporting qualitative research (COREQ):  
37 a 32-item checklist for interviews and focus groups. *International Journal for Quality in Health Care*.  
38 2007;19(6):349-57. [doi.org/10.1093/intqhc/mzm042](https://doi.org/10.1093/intqhc/mzm042). [published Online First: 14 Sept 2007].  
39  
40
- 41  
42 16. Braun V, Clarke V. Using thematic analysis in psychology. *Qualitative Research in Psychology*.  
43 2006;3(2):77-101.  
44  
45
- 46  
47 17. Kluge. Empirically Grounded Construction of Types and Typologies in Qualitative Social  
48 Reserach: Forum: Qualitative Social Research 2007 1 (1), Art. 14:[Available from: [http://nbn-](http://nbn-resolving.de/urn:nbn:de:0114-fqs0001145)  
49 [resolving.de/urn:nbn:de:0114-fqs0001145](http://nbn-resolving.de/urn:nbn:de:0114-fqs0001145)]. Accessed Jan 2020.  
50  
51  
52  
53  
54  
55  
56  
57  
58  
59  
60



- 1  
2  
3 18. Devereux-Fitzgerald A, Powell R, Dewhurst A, et al.. The acceptability of physical activity  
4 interventions to older adults: A systematic review and meta-synthesis. *Soc Sci & Med.* 2016;158:14-  
5  
6 23. doi: 10.1016/j.socscimed.2016.04.006. [published Online First: 10 Apr 2016].  
7  
8  
9  
10 19. Fox L, Wiseman T, Cahill D, et al. Barriers and facilitators to physical activity in men with  
11 prostate cancer: A qualitative and quantitative systematic review. *Psychooncology.*  
12  
13 2019;28(12):2270-85. doi: 10.1002/pon.5240. [published Online First: 6 Nov 2019].  
14  
15  
16 20. McDonough MH, Beselt LJ, Daun JT, et al. The role of social support in physical activity for  
17 cancer survivors: A systematic review. *Psychooncology.* 2019;28(10):1945-58. doi:  
18 10.1002/pon.5171. [published Online First: 16 Aug 2019].  
19  
20  
21 21. Midtgaard J, Rossell K, Christensen JF, et al. Demonstration and manifestation of self-  
22 determination and illness resistance-A qualitative study of long-term maintenance of physical  
23 activity in posttreatment cancer survivors. *Supportive Care Cancer.* 2012;20(9):1999-2008. doi:  
24 10.1007/s00520-011-1304-8. [published Online First: 15 Nov 2011].  
25  
26  
27 22. Granger CL, Connolly B, Denehy L, et al. Understanding factors influencing physical activity  
28 and exercise in lung cancer: a systematic review. *Support Care Cancer.* 2017;25(3):983-99. doi:  
29 10.1007/s00520-016-3484-8. [published Online First: 29 Nov 2016].  
30  
31  
32 23. Brunet J, Taran S, Burke S, et al. A qualitative exploration of barriers and motivators to  
33 physical activity participation in women treated for breast cancer. *Disabil Rehabil.* 2013;35(24):2038-  
34 45. doi: 10.3109/09638288.2013.802378. [published Online First: 17 Jun 2013].  
35  
36  
37 24. Hefferon K, Murphy H, McLeod J, et al. Understanding barriers to exercise implementation  
38 5-year post-breast cancer diagnosis: a large-scale qualitative study. *Health Educ Res.* 2013;28(5):843-  
39 56. doi: 10.1093/her/cyt083. [published Online First: 22 Aug 2013].  
40  
41  
42 25. Kwasnicka D, Dombrowski SU, White M, et al. Theoretical explanations for maintenance of  
43 behaviour change: a systematic review of behaviour theories. *Health Psychology Review.*  
44  
45 2016;10(3):277-96. doi: 10.1080/17437199.2016.1151372. [published Online First: 7 Mar 2016].  
46  
47  
48  
49  
50  
51  
52  
53  
54  
55  
56  
57  
58  
59  
60

- 1  
2  
3 26. Gardner, B., Rebar, A., Lally, P. Habit Interventions. In <.S. Hagger, L. D. Cameron, K.  
4 Hamilton, N. Hankonen & T. Lintunen (eds.), *The Handbook of Behavior Change* (pp.599-616\_. New  
5 York, NY: Cambridge University Press. <https://doi.org/10.1017/97811086773180.041>.  
6  
7  
8  
9  
10 27. Gardner B. A review and analysis of the use of 'habit' in understanding, predicting and  
11 influencing health-related behaviour. *Health Psychol Rev.* 2015;9(3):277-95. doi:  
12 10.1080/17437199.2013.876238. [published Online First: 21 jan 2014].  
13  
14  
15  
16 28. Wood W, R niger D. Psychology of Habit. *Annu Rev Psychol.* 2016;67(1):289-314. doi:  
17 10.1146/annurev-psych-122414-033417. [published Online First: 10 Sept 2015].  
18  
19  
20  
21 29. Strack F, Deutsch R. Reflective and impulsive determinants of social behavior. *Pers Soc*  
22 *Psychol Rev.* 2004;8(3):220-47.  
23  
24  
25  
26 30. Lally P, van Jaarsveld CHM, Potts HWW, et al. How are habits formed: Modelling habit  
27 formation in the real world. *Eur J of Social Psych.* 2010;40(6):998-1009. Doi.org/10.1002/ejsp.674.  
28 [published Online First: 16 Jul 2009].  
29  
30  
31  
32 31. McGowan LJ, Devereux-Fitzgerald A, Powell R, et al.. How acceptable do older adults find the  
33 concept of being physically active? A systematic review and meta-synthesis. *Int Rev Sport Ex Psycho.*  
34 2018;11(1):1-24. [doi.org/10.1080/1750984X.2016.1272705](https://doi.org/10.1080/1750984X.2016.1272705). [published Online First: 16 Jan 2017].  
35  
36  
37  
38  
39  
40  
41  
42  
43  
44  
45  
46  
47  
48  
49  
50  
51  
52  
53  
54  
55  
56  
57  
58  
59  
60

Figure 1.1: Maintained PA

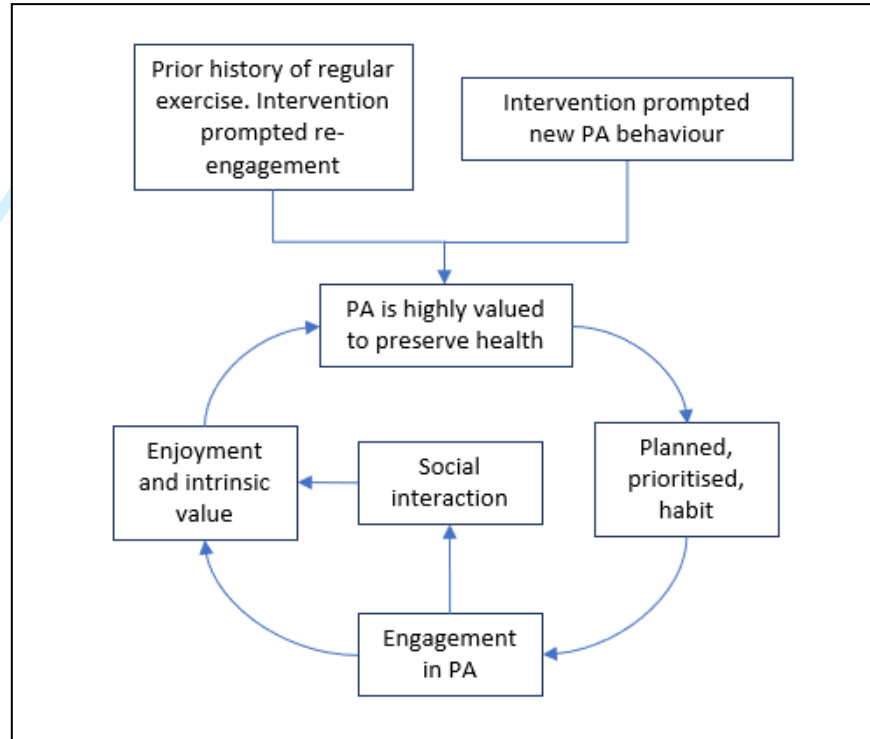

Figure 1.2: Intermittent PA

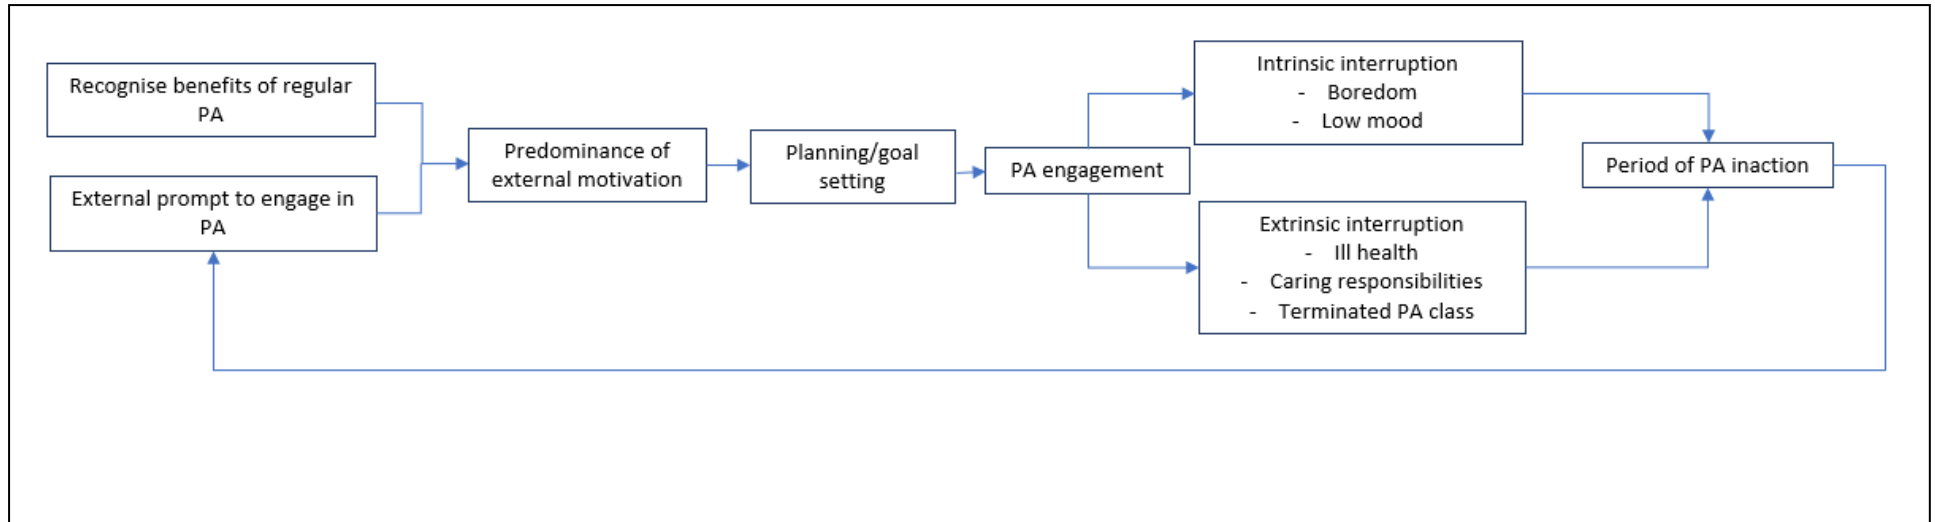

ew only

Figure 1.3: Low activity

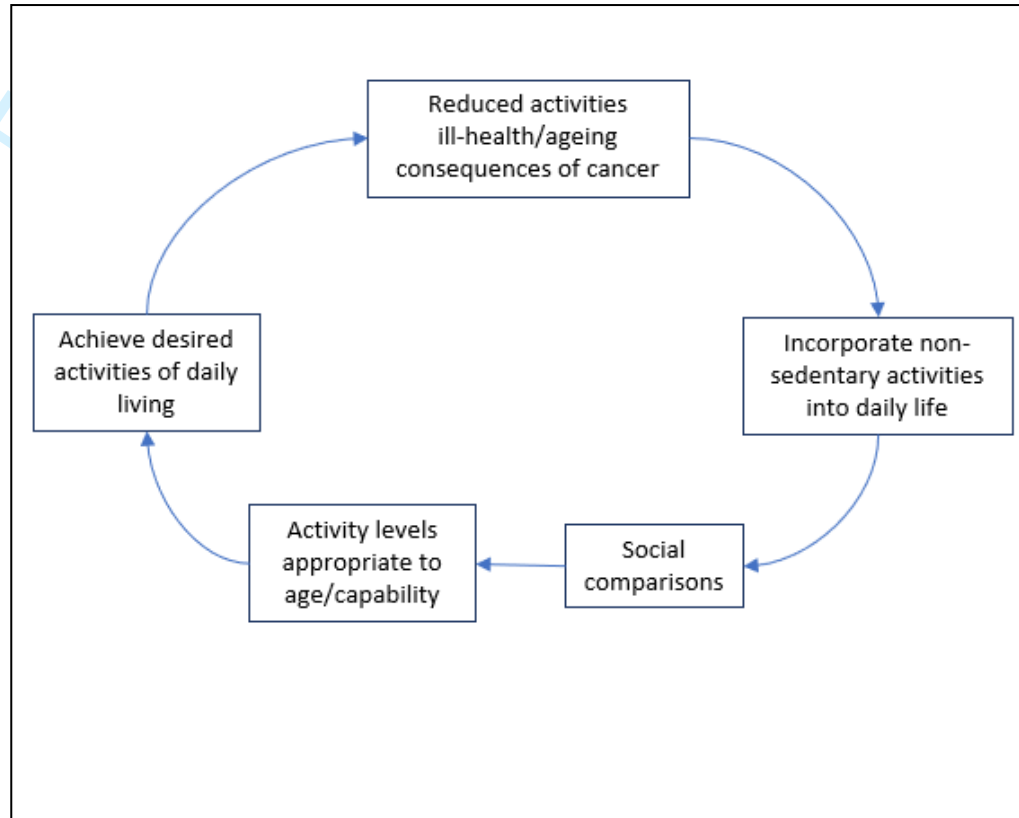

1  
2  
3  
4  
5  
6  
7  
8  
9  
10  
11  
12  
13  
14  
15  
16  
17  
18  
19  
20  
21  
22  
23  
24  
25  
26  
27  
28  
29  
30  
31  
32  
33  
34  
35  
36  
37  
38  
39  
40  
41  
42  
43  
44  
45  
46

## Appendix A – Interview guide

- What did you do as part of the [name physical activity programme]?
- How did you incorporate this into your day to day life?
- How are things now in relation to your physical activity habits?
- For those who describe increased/regular physical activity engagement:
  - What has helped you to make these changes?
  - Have there been any challenges to you staying active?
  - Why have you made these changes?
  - Has anyone else helped you to stay active?
  - Did you have to make changes to other parts of your life to incorporate more physical activity?
  - How does your activity impact on you? Prompt - How does it make you feel? Does it affect any other areas of your life?
  - In what way is physical activity important to your everyday life?
- For those who describe no change in physical activity levels:
  - Would you like to be doing anything differently?
  - If yes – what are the main things that prevent you from being more active?
- For those who describe an initial increase but then a decline in physical activity levels:
  - Why do you think your activity levels reduced after the trial?
  - Would you like to be doing anything differently?
  - If yes – what are the main things that prevent you from doing so?
- How do your physical activity habits compare to times before your cancer diagnosis?

## COREQ (CONsolidated criteria for REporting Qualitative research) Checklist

A checklist of items that should be included in reports of qualitative research. You must report the page number in your manuscript where you consider each of the items listed in this checklist. If you have not included this information, either revise your manuscript accordingly before submitting or note N/A.

| Topic                                          | Item No. | Guide Questions/Description                                                                                                                              | Reported on Page No. |
|------------------------------------------------|----------|----------------------------------------------------------------------------------------------------------------------------------------------------------|----------------------|
| <b>Domain 1: Research team and reflexivity</b> |          |                                                                                                                                                          |                      |
| <i>Personal characteristics</i>                |          |                                                                                                                                                          |                      |
| Interviewer/facilitator                        | 1        | Which author/s conducted the interview or focus group?                                                                                                   |                      |
| Credentials                                    | 2        | What were the researcher's credentials? E.g. PhD, MD                                                                                                     |                      |
| Occupation                                     | 3        | What was their occupation at the time of the study?                                                                                                      |                      |
| Gender                                         | 4        | Was the researcher male or female?                                                                                                                       |                      |
| Experience and training                        | 5        | What experience or training did the researcher have?                                                                                                     |                      |
| <i>Relationship with participants</i>          |          |                                                                                                                                                          |                      |
| Relationship established                       | 6        | Was a relationship established prior to study commencement?                                                                                              |                      |
| Participant knowledge of the interviewer       | 7        | What did the participants know about the researcher? e.g. personal goals, reasons for doing the research                                                 |                      |
| Interviewer characteristics                    | 8        | What characteristics were reported about the interviewer/facilitator? e.g. Bias, assumptions, reasons and interests in the research topic                |                      |
| <b>Domain 2: Study design</b>                  |          |                                                                                                                                                          |                      |
| <i>Theoretical framework</i>                   |          |                                                                                                                                                          |                      |
| Methodological orientation and Theory          | 9        | What methodological orientation was stated to underpin the study? e.g. grounded theory, discourse analysis, ethnography, phenomenology, content analysis |                      |
| <i>Participant selection</i>                   |          |                                                                                                                                                          |                      |
| Sampling                                       | 10       | How were participants selected? e.g. purposive, convenience, consecutive, snowball                                                                       |                      |
| Method of approach                             | 11       | How were participants approached? e.g. face-to-face, telephone, mail, email                                                                              |                      |
| Sample size                                    | 12       | How many participants were in the study?                                                                                                                 |                      |
| Non-participation                              | 13       | How many people refused to participate or dropped out? Reasons?                                                                                          |                      |
| <i>Setting</i>                                 |          |                                                                                                                                                          |                      |
| Setting of data collection                     | 14       | Where was the data collected? e.g. home, clinic, workplace                                                                                               |                      |
| Presence of non-participants                   | 15       | Was anyone else present besides the participants and researchers?                                                                                        |                      |
| Description of sample                          | 16       | What are the important characteristics of the sample? e.g. demographic data, date                                                                        |                      |
| <i>Data collection</i>                         |          |                                                                                                                                                          |                      |
| Interview guide                                | 17       | Were questions, prompts, guides provided by the authors? Was it pilot tested?                                                                            |                      |
| Repeat interviews                              | 18       | Were repeat interviews carried out? If yes, how many?                                                                                                    |                      |
| Audio/visual recording                         | 19       | Did the research use audio or visual recording to collect the data?                                                                                      |                      |
| Field notes                                    | 20       | Were field notes made during and/or after the interview or focus group?                                                                                  |                      |
| Duration                                       | 21       | What was the duration of the interviews or focus group?                                                                                                  |                      |
| Data saturation                                | 22       | Was data saturation discussed?                                                                                                                           |                      |
| Transcripts returned                           | 23       | Were transcripts returned to participants for comment and/or                                                                                             |                      |

| Topic                                  | Item No. | Guide Questions/Description                                                                                                        | Reported on Page No. |
|----------------------------------------|----------|------------------------------------------------------------------------------------------------------------------------------------|----------------------|
|                                        |          | correction?                                                                                                                        |                      |
| <b>Domain 3: analysis and findings</b> |          |                                                                                                                                    |                      |
| <i>Data analysis</i>                   |          |                                                                                                                                    |                      |
| Number of data coders                  | 24       | How many data coders coded the data?                                                                                               |                      |
| Description of the coding tree         | 25       | Did authors provide a description of the coding tree?                                                                              |                      |
| Derivation of themes                   | 26       | Were themes identified in advance or derived from the data?                                                                        |                      |
| Software                               | 27       | What software, if applicable, was used to manage the data?                                                                         |                      |
| Participant checking                   | 28       | Did participants provide feedback on the findings?                                                                                 |                      |
| <i>Reporting</i>                       |          |                                                                                                                                    |                      |
| Quotations presented                   | 29       | Were participant quotations presented to illustrate the themes/findings?<br>Was each quotation identified? e.g. participant number |                      |
| Data and findings consistent           | 30       | Was there consistency between the data presented and the findings?                                                                 |                      |
| Clarity of major themes                | 31       | Were major themes clearly presented in the findings?                                                                               |                      |
| Clarity of minor themes                | 32       | Is there a description of diverse cases or discussion of minor themes?                                                             |                      |

Developed from: Tong A, Sainsbury P, Craig J. Consolidated criteria for reporting qualitative research (COREQ): a 32-item checklist for interviews and focus groups. *International Journal for Quality in Health Care*. 2007. Volume 19, Number 6: pp. 349 – 357

**Once you have completed this checklist, please save a copy and upload it as part of your submission. DO NOT include this checklist as part of the main manuscript document. It must be uploaded as a separate file.**



# BMJ Open

## Exploring maintenance of physical activity behaviour change among people living with and beyond gastrointestinal cancer: A cross-sectional qualitative study and typology

|                                 |                                                                                                                                                                                                                                                                                                                                                                                                                                                                                                                                                                                                                                                                                                                                                                                                                                                                                       |
|---------------------------------|---------------------------------------------------------------------------------------------------------------------------------------------------------------------------------------------------------------------------------------------------------------------------------------------------------------------------------------------------------------------------------------------------------------------------------------------------------------------------------------------------------------------------------------------------------------------------------------------------------------------------------------------------------------------------------------------------------------------------------------------------------------------------------------------------------------------------------------------------------------------------------------|
| Journal:                        | <i>BMJ Open</i>                                                                                                                                                                                                                                                                                                                                                                                                                                                                                                                                                                                                                                                                                                                                                                                                                                                                       |
| Manuscript ID                   | bmjopen-2020-037136.R2                                                                                                                                                                                                                                                                                                                                                                                                                                                                                                                                                                                                                                                                                                                                                                                                                                                                |
| Article Type:                   | Original research                                                                                                                                                                                                                                                                                                                                                                                                                                                                                                                                                                                                                                                                                                                                                                                                                                                                     |
| Date Submitted by the Author:   | 23-Sep-2020                                                                                                                                                                                                                                                                                                                                                                                                                                                                                                                                                                                                                                                                                                                                                                                                                                                                           |
| Complete List of Authors:       | Grimmett, Chloe; University of Southampton, Macmillan Survivorship Research Group, School of Health Sciences, Bld 67, Highfield Campus<br>Foster, Claire; University of Southampton, Macmillan Survivorship Research Group, School of Health Sciences, Bld 67, Highfield Campus<br>Bradbury, Katherine; University of Southampton, Centre for Clinical and Community Health Psychology<br>Lally, Phillippa; University College London Medical School, ; UCL<br>May, Carl; London School of Hygiene and Tropical Medicine Faculty of Epidemiology and Population Health<br>Myall, Michelle; University of Southampton, NIHR ARC Wessex, School of Health Sciences, Bld 67, Highfield Campus<br>Pinto, Bernardine; University of South Carolina, College of Nursing<br>Corbett, Teresa; University of Southampton, NIHR ARC Wessex, School of Health Sciences, Bld 67, Highfield Campus |
| <b>Primary Subject Heading</b>: | Oncology                                                                                                                                                                                                                                                                                                                                                                                                                                                                                                                                                                                                                                                                                                                                                                                                                                                                              |
| Secondary Subject Heading:      | Qualitative research                                                                                                                                                                                                                                                                                                                                                                                                                                                                                                                                                                                                                                                                                                                                                                                                                                                                  |
| Keywords:                       | ONCOLOGY, SPORTS MEDICINE, QUALITATIVE RESEARCH                                                                                                                                                                                                                                                                                                                                                                                                                                                                                                                                                                                                                                                                                                                                                                                                                                       |
|                                 |                                                                                                                                                                                                                                                                                                                                                                                                                                                                                                                                                                                                                                                                                                                                                                                                                                                                                       |

SCHOLARONE™  
Manuscripts



I, the Submitting Author has the right to grant and does grant on behalf of all authors of the Work (as defined in the below author licence), an exclusive licence and/or a non-exclusive licence for contributions from authors who are: i) UK Crown employees; ii) where BMJ has agreed a CC-BY licence shall apply, and/or iii) in accordance with the terms applicable for US Federal Government officers or employees acting as part of their official duties; on a worldwide, perpetual, irrevocable, royalty-free basis to BMJ Publishing Group Ltd ("BMJ") its licensees and where the relevant Journal is co-owned by BMJ to the co-owners of the Journal, to publish the Work in this journal and any other BMJ products and to exploit all rights, as set out in our [licence](#).

The Submitting Author accepts and understands that any supply made under these terms is made by BMJ to the Submitting Author unless you are acting as an employee on behalf of your employer or a postgraduate student of an affiliated institution which is paying any applicable article publishing charge ("APC") for Open Access articles. Where the Submitting Author wishes to make the Work available on an Open Access basis (and intends to pay the relevant APC), the terms of reuse of such Open Access shall be governed by a Creative Commons licence – details of these licences and which [Creative Commons](#) licence will apply to this Work are set out in our licence referred to above.

Other than as permitted in any relevant BMJ Author's Self Archiving Policies, I confirm this Work has not been accepted for publication elsewhere, is not being considered for publication elsewhere and does not duplicate material already published. I confirm all authors consent to publication of this Work and authorise the granting of this licence.

1  
2  
3 **Exploring maintenance of physical activity behaviour change among people living with and**  
4 **beyond gastrointestinal cancer: A cross-sectional qualitative study and typology**  
5  
6  
7

8 Chloe Grimmett, Claire Foster, Katherine Bradbury, Phillippa Lally, Carl R May, Michelle Myall,  
9 Bernardine Pinto, Teresa Corbett  
10  
11

12 Prof Claire Foster, Macmillan Survivorship Research Group, School of Health Sciences, University of  
13 Southampton, Southampton SO17 1BJ, UK  
14  
15

16 Dr Katherine Bradbury, Centre for Clinical and Community Health Psychology, University of  
17 Southampton, Southampton SO17 1BJ, UK  
18  
19

20 Dr Phillippa Lally, Research Department of Behavioural Science and Health, UCL, Gower Street,  
21 London WC1E 6BT, UK  
22  
23

24 Prof C R May, Faculty of Public Health and Policy, London School of Hygiene and Tropical Medicine,  
25 London WC1H 9SH, UK  
26  
27

28 Dr Michelle Myall, NIHR ARC Wessex, School of Health Sciences, University of Southampton,  
29 Southampton SO17 1BJ, UK  
30  
31

32 Dr Bernardine Pinto, College of Nursing, University of South Carolina, SC 29208, USA  
33  
34

35 Dr Teresa Corbett, NIHR ARC Wessex, School of Health Sciences, University of Southampton,  
36 Southampton SO17 1BJ, UK  
37  
38  
39  
40

41 **Corresponding author:** Dr Chloe Grimmett, School of Health Sciences, University of Southampton,  
42 Southampton SO17 1BJ, UK. Tel +44 (0)2380 597964. Email: C.Grimmett@soton.ac.uk  
43  
44  
45  
46  
47

48 **Word count:** 4757  
49  
50  
51

52 **Key words:** physical activity, cancer, maintenance, typology, barriers, facilitators  
53  
54  
55  
56  
57  
58  
59  
60

**Abstract**

Objectives: In the last decade there has been a rapid expansion of physical activity (PA) promotion programmes and interventions targeting people living with and beyond cancer. The impact that these initiatives have on long-term maintenance of PA remains under-researched. This study sought to explore the experiences of participants in order to characterise those who have and have not successfully sustained increases in PA following participation in a PA intervention after a diagnosis of gastrointestinal cancer, and identify barriers and facilitators of this behaviour.

Design: Cross-sectional qualitative study. Semi-structured interviews with participants who had previously taken part in a physical activity program in the UK explored current and past PA behaviour and factors that promoted or inhibited regular PA participation. Interviews were audio recorded, transcribed verbatim and analysed using thematic analysis. Themes and sub-themes were identified. Differences between individuals were recognised and a typology of PA engagement was developed.

Participants: Twenty-seven individuals (N = 15 male, mean age = 66.3 years) with a diagnosis of GI cancer who had participated in one of four interventions designed to encourage PA participation.

Setting: United Kingdom.

Results: Seven themes were identified: disease processes, the role of ageing, emotion and psychological well-being, incorporating PA into everyday life, social interaction, support and self-monitoring and competing demands. A typology with three types describing long-term PA engagement was generated 1) maintained PA, 2) intermittent PA, 3) low activity. Findings indicate that identifying an enjoyable activity that is appropriate to an individual's level of physical functioning and is highly valued is key to supporting long-term PA engagement.

Conclusion: The typology described here can be used to guide stratified and personalised intervention development and support sustained PA engagement by people living with and beyond cancer.

### Strengths and limitations of this study:

- This qualitative study using in-depth interviews with individuals engaging in varying levels of physical activity provides novel insight into the barriers and facilitators to long-term physical activity engagement after diagnosis and treatment of cancer.
- The typology presented can help inform the design and delivery of personalised physical activity interventions to support long-term behaviour change.
- Findings may be limited because participants were recruited from completed physical activity interventions and therefore do not reflect the views and experiences of individual who were unwilling or unable to take part in such a trial.

### INTRODUCTION

There is robust evidence that physical activity (PA) can provide improvements in physiological and psychosocial outcomes in people living with and beyond cancer (LWBC), including enhanced quality of life, physical function and reductions in cancer-related fatigue[1]. Furthermore, observational data suggest PA may reduce cancer recurrence, death from cancer and other causes in some cancer types. Therefore, cancer survivors potentially stand to benefit considerably from engagement in PA and consequently it is recommended that regular PA be promoted as part of the cancer care pathway[2]. The most recent guidelines from the American College of Sports Medicine suggest those LWBC should avoid inactivity and aim to achieve public health guidelines of 150 minutes per week of aerobic exercise and twice a week resistance exercise. This level of PA can also reduce the risk of developing chronic diseases, delay decline in physical and mental functioning associated with aging, and extend life[3].

1  
2  
3 The majority of cancer survivors do not meet these recommendations, and are less active than those  
4 without a history of cancer[4]. There has been a rapid expansion of PA promotion programmes and  
5 interventions targeting people LWBC to address this imbalance. Evidence suggests on-site  
6 supervised, home-based, web-based, individual and group and peer-support interventions can  
7 successfully increase PA in the short and medium term[5-7]. Furthermore, a recent systematic  
8 review and meta-analysis of long-term PA behaviour reported a moderate impact at least 3 months  
9 post-intervention completion[8]. However, there is wide variation of impact at an individual level  
10 with large standard deviations in self-reported and/or objectively recorded PA. This is elegantly  
11 illustrated by Morey and colleague's trajectory analysis of the RENEW study, a broad-reach  
12 intervention delivered by printed materials and telephone to older adults with a diagnosis of  
13 cancer[9]. The authors report a small proportion (7%) of participants did not engage in any PA at any  
14 point during the study. This is in contrast to 33% who increased PA at the end of the intervention but  
15 declined during the observational follow-up and around 60% who maintained increases in PA during  
16 the intervention and 12-month follow-up period. If interventions are to be developed that  
17 successfully support as many individuals as possible to maintain a physically active lifestyle we need  
18 to understand factors that promote and inhibit this maintenance of PA.

19  
20  
21  
22  
23  
24  
25  
26  
27  
28  
29  
30  
31  
32  
33  
34  
35  
36  
37  
38  
39  
40 Individuals diagnosed with gastrointestinal (GI) cancers, such as colon, rectal, stomach and  
41 oesophageal are a particularly important group to consider. Affecting both men and women, cancers  
42 of the colon and rectum are particularly prevalent in older age which means individuals frequently  
43 present with other comorbidities. Individuals LWB GI cancer may also experience troublesome  
44 symptoms such as stool frequency and urgency, incontinence, fatigue and pain[10] making adoption  
45 and maintenance of PA particularly challenging.

46  
47  
48  
49  
50  
51  
52  
53  
54  
55  
56  
57  
58  
59  
60  
There is a paucity of published literature exploring challenges and enablers to long-term PA  
behaviour change among cancer populations. A recent mixed methods review investigated barriers,  
facilitators and preferences for PA among people LWBC and found that common barriers were

1  
2  
3 treatment-related side effects, lack of time and fatigue[11]. Facilitators included exercising to gain  
4 control over health and feelings of well-being. However, the majority of studies in this review  
5  
6 focused on uptake and/or participation in interventions, with little attention paid to experiences of  
7  
8 independent and sustained (or not) behaviour change post-intervention. Furthermore, only 4 of the  
9  
10  
11  
12 19 studies included individuals with GI cancer.

13  
14  
15 This paper reports findings from a qualitative study that sought to explore the experiences of  
16  
17 participants in order to characterise those who have and have not successfully sustained increases in  
18  
19 PA following participation in a PA intervention after a diagnosis of GI cancer, and identify factors that  
20  
21 promote and inhibit this behaviour.  
22

## 23 24 25 26 27 **1. METHODS**

### 28 29 30 **2.1 Recruitment and procedure**

31  
32  
33 Participants were recruited from four PA promotion programmes in England and Northern Ireland  
34  
35 (see Table 1). The coordinators of the programmes identified eligible participants: previous diagnosis  
36  
37 of colorectal, oesophageal or stomach cancer and had completed the PA programme more than 6  
38  
39 months before participating in the current study and sent a letter of invitation to take part in the  
40  
41 current study. Those who were willing were asked to return a reply slip to the coordinating centre at  
42  
43 the University of Southampton.  
44  
45  
46  
47  
48  
49  
50  
51

52 **Table 1: Programmes from which participants were recruited.**

| 53<br>54 <b>Project</b>                                                   | 55<br>56 <b>Description</b>                                                                                                                                                                                                                                             |
|---------------------------------------------------------------------------|-------------------------------------------------------------------------------------------------------------------------------------------------------------------------------------------------------------------------------------------------------------------------|
| 57<br>58<br>59 The Advancing Survivor<br>Cancer Outcomes Trial<br>(ASCOT) | 60 A lifestyle programme for those diagnosed with breast, prostate<br>or colorectal cancer. ASCOT was a distance-based lifestyle<br>intervention, delivered through printed materials and personally<br>tailored telephone discussions underpinned by habit theory[12]. |

|                                                                                                               |                                                                                                                                                                                                                                                                    |
|---------------------------------------------------------------------------------------------------------------|--------------------------------------------------------------------------------------------------------------------------------------------------------------------------------------------------------------------------------------------------------------------|
|                                                                                                               | See published protocol[13]. Identified participants had a previous diagnosis of colorectal cancer and had set at least one PA goal during the study.                                                                                                               |
| Efficacy of an exercise training programme during Concurrent neoadjuvant cancer treatments) trial (ENCOURAGE) | ENCOURAGE participants took part in a structured, supervised hospital-based exercise programme before during and after cancer treatments and prior to surgery.                                                                                                     |
| Active Everyday                                                                                               | A PA referral programme based in Sheffield, UK. Participants received personalised behaviour change support and sign-posting to local PA opportunities[14]. Colorectal cancer only.                                                                                |
| Macmillan Move More Programme – Northern Ireland                                                              | Participants receive personalised support with one-to-one consultations and advice to increase their activity levels and appropriate sign-posting to local opportunities including group-based exercise programmes for people LWBC cancer. Colorectal cancer only. |

## 2.2 Ethical statement

Ethical approval was obtained from the Health Research Authority and the University of Southampton Research Ethics committee prior to recruitment and data collection. Participants were provided with information sheets and gave written consent prior to interview.

## 2.3 Procedure

The study was reported according to the Consolidation Criteria for Reporting Qualitative Research (COREQ)[15]. See supplementary file 1.

All interviews were conducted by CG (an experienced qualitative researcher) and audio-recorded (with consent) using an encrypted electronic device. CG is a member of the trial steering committee for the ASCOT study but did not have direct involvement with the delivery of the intervention.

Participants were informed that the current study was independent of the study in which they had previously taken part.

One-to-one telephone interviews took place between January and June 2019 and lasted between 40 and 75 minutes. Semi-structured Interviews were carried out using a topic guide comprising open



1  
2  
3 questions designed to explore and capture data on factors that influenced the maintenance (or not)  
4  
5 of PA following participation in a PA programme (see supplementary file 2).  
6  
7

8 Participants were also asked to complete a short demographics questionnaire to capture, age, sex,  
9  
10 cancer type, marital status, ethnicity, level of education, home and car ownership, occupation and  
11  
12 caring responsibilities.  
13  
14

## 15 **2.4 Analysis**

16  
17 A thematic analysis was conducted as described by Braun & Clarke[16]. A recursive process was  
18  
19 employed, moving back and forth between stages with continuous interpretation of the data from  
20  
21 the outset.  
22  
23

24  
25 1) Transcription: interviews were audio-recorded using an encrypted audio recorder and transcribed  
26  
27 verbatim by an independent, experienced transcriber. Transcripts were checked against audio  
28  
29 recorders, were anonymised and pseudonyms attributed. 2) Familiarisation with data: transcripts  
30  
31 and field notes were read and re-read with analytical notes, thoughts and impressions recorded  
32  
33 freehand. 3) Generating initial codes: transcripts were read line by line and initial codes applied. TC,  
34  
35 CG and CRM coded a sample of transcripts (n=3). A data analysis workshop was then held to discuss  
36  
37 codes and their labels. TC and CG coded a further 3 transcripts followed by a second analysis  
38  
39 workshop before CG coded the remaining interviews. 4) Searching for themes: codes were then  
40  
41 sorted into themes and sub-themes by CG and an initial thematic map generated and 5) Reviewing,  
42  
43 defining and naming themes: themes were data driven, identified at a semantic level within the  
44  
45 realist paradigm. A further analysis workshop was held between TC, CG and CRM to discuss the  
46  
47 themes, sub-themes and the relationships between them, while also interrogating the data between  
48  
49 cases. Refinements were made and CG revisited the transcripts to determine if themes and sub-  
50  
51 themes were an accurate representation of the data. NVIVO was used to manage the data.  
52  
53  
54  
55  
56  
57  
58  
59  
60

1  
2  
3 Analysis indicated that groups of cases (individuals) existed and it was possible to develop a  
4  
5 typology. A typology provides a useful way of describing groups of individuals with different clusters  
6  
7 of behaviours, values or attitudes. Kluge's[17] four stage process of construction of empirically  
8  
9 grounded types was followed. Stage 1; 'development of relevant analysing dimensions' – was  
10  
11 achieved through the thematic analysis described above; here 'dimensions' are themes and sub-  
12  
13 themes. Stage 2; 'grouping of cases and analysis of empirical regularities' – individual cases were  
14  
15 compared and contrasted and their position within the themes and sub-themes determined. Stage  
16  
17 3; 'analysis of meaningful relations and type construction' – relationships between the themes of the  
18  
19 groups were analysed and heterogeneity between groups checked, i.e. sufficient variation in data  
20  
21 existed between the groups. Stage 4; 'characterisation of the constructed types' – through an  
22  
23 iterative process, including discussion with the wider research team, the final typology of PA  
24  
25 maintenance was characterised.  
26  
27  
28

29  
30 Critical reflection was practiced throughout, and peer de-briefing was used to explore researcher  
31  
32 bias.  
33  
34  
35

## 36 **2.5 Patient and public involvement**

37  
38 Patients and carers were involved in the conception of this study which forms part of a National  
39  
40 Institute for Health Research post-doctoral fellowship. They reviewed the letters of invitation,  
41  
42 patient information sheets and consent forms and suggested amendments. Patients and carers will  
43  
44 also be involved in the dissemination of results, supporting the writing of a participant report and  
45  
46 using their networks to disseminate results to wider patient communities.  
47  
48  
49

## 50 **3. RESULTS**

### 51 **3.1 Characteristics of respondents**

52  
53 Letters of invitation were sent to 124 individuals who had previously completed one of the four  
54  
55  
56  
57  
58  
59  
60  
61  
62  
63  
64  
65  
66  
67  
68  
69  
70  
71  
72  
73  
74  
75  
76  
77  
78  
79  
80  
81  
82  
83  
84  
85  
86  
87  
88  
89  
90  
91  
92  
93  
94  
95  
96  
97  
98  
99  
100  
101  
102  
103  
104  
105  
106  
107  
108  
109  
110  
111  
112  
113  
114  
115  
116  
117  
118  
119  
120  
121  
122  
123  
124  
125  
126  
127  
128  
129  
130  
131  
132  
133  
134  
135  
136  
137  
138  
139  
140  
141  
142  
143  
144  
145  
146  
147  
148  
149  
150  
151  
152  
153  
154  
155  
156  
157  
158  
159  
160  
161  
162  
163  
164  
165  
166  
167  
168  
169  
170  
171  
172  
173  
174  
175  
176  
177  
178  
179  
180  
181  
182  
183  
184  
185  
186  
187  
188  
189  
190  
191  
192  
193  
194  
195  
196  
197  
198  
199  
200  
201  
202  
203  
204  
205  
206  
207  
208  
209  
210  
211  
212  
213  
214  
215  
216  
217  
218  
219  
220  
221  
222  
223  
224  
225  
226  
227  
228  
229  
230  
231  
232  
233  
234  
235  
236  
237  
238  
239  
240  
241  
242  
243  
244  
245  
246  
247  
248  
249  
250  
251  
252  
253  
254  
255  
256  
257  
258  
259  
260  
261  
262  
263  
264  
265  
266  
267  
268  
269  
270  
271  
272  
273  
274  
275  
276  
277  
278  
279  
280  
281  
282  
283  
284  
285  
286  
287  
288  
289  
290  
291  
292  
293  
294  
295  
296  
297  
298  
299  
300  
301  
302  
303  
304  
305  
306  
307  
308  
309  
310  
311  
312  
313  
314  
315  
316  
317  
318  
319  
320  
321  
322  
323  
324  
325  
326  
327  
328  
329  
330  
331  
332  
333  
334  
335  
336  
337  
338  
339  
340  
341  
342  
343  
344  
345  
346  
347  
348  
349  
350  
351  
352  
353  
354  
355  
356  
357  
358  
359  
360  
361  
362  
363  
364  
365  
366  
367  
368  
369  
370  
371  
372  
373  
374  
375  
376  
377  
378  
379  
380  
381  
382  
383  
384  
385  
386  
387  
388  
389  
390  
391  
392  
393  
394  
395  
396  
397  
398  
399  
400  
401  
402  
403  
404  
405  
406  
407  
408  
409  
410  
411  
412  
413  
414  
415  
416  
417  
418  
419  
420  
421  
422  
423  
424  
425  
426  
427  
428  
429  
430  
431  
432  
433  
434  
435  
436  
437  
438  
439  
440  
441  
442  
443  
444  
445  
446  
447  
448  
449  
450  
451  
452  
453  
454  
455  
456  
457  
458  
459  
460  
461  
462  
463  
464  
465  
466  
467  
468  
469  
470  
471  
472  
473  
474  
475  
476  
477  
478  
479  
480  
481  
482  
483  
484  
485  
486  
487  
488  
489  
490  
491  
492  
493  
494  
495  
496  
497  
498  
499  
500  
501  
502  
503  
504  
505  
506  
507  
508  
509  
510  
511  
512  
513  
514  
515  
516  
517  
518  
519  
520  
521  
522  
523  
524  
525  
526  
527  
528  
529  
530  
531  
532  
533  
534  
535  
536  
537  
538  
539  
540  
541  
542  
543  
544  
545  
546  
547  
548  
549  
550  
551  
552  
553  
554  
555  
556  
557  
558  
559  
560  
561  
562  
563  
564  
565  
566  
567  
568  
569  
570  
571  
572  
573  
574  
575  
576  
577  
578  
579  
580  
581  
582  
583  
584  
585  
586  
587  
588  
589  
590  
591  
592  
593  
594  
595  
596  
597  
598  
599  
600  
601  
602  
603  
604  
605  
606  
607  
608  
609  
610  
611  
612  
613  
614  
615  
616  
617  
618  
619  
620  
621  
622  
623  
624  
625  
626  
627  
628  
629  
630  
631  
632  
633  
634  
635  
636  
637  
638  
639  
640  
641  
642  
643  
644  
645  
646  
647  
648  
649  
650  
651  
652  
653  
654  
655  
656  
657  
658  
659  
660  
661  
662  
663  
664  
665  
666  
667  
668  
669  
670  
671  
672  
673  
674  
675  
676  
677  
678  
679  
680  
681  
682  
683  
684  
685  
686  
687  
688  
689  
690  
691  
692  
693  
694  
695  
696  
697  
698  
699  
700  
701  
702  
703  
704  
705  
706  
707  
708  
709  
710  
711  
712  
713  
714  
715  
716  
717  
718  
719  
720  
721  
722  
723  
724  
725  
726  
727  
728  
729  
730  
731  
732  
733  
734  
735  
736  
737  
738  
739  
740  
741  
742  
743  
744  
745  
746  
747  
748  
749  
750  
751  
752  
753  
754  
755  
756  
757  
758  
759  
760  
761  
762  
763  
764  
765  
766  
767  
768  
769  
770  
771  
772  
773  
774  
775  
776  
777  
778  
779  
780  
781  
782  
783  
784  
785  
786  
787  
788  
789  
790  
791  
792  
793  
794  
795  
796  
797  
798  
799  
800  
801  
802  
803  
804  
805  
806  
807  
808  
809  
810  
811  
812  
813  
814  
815  
816  
817  
818  
819  
820  
821  
822  
823  
824  
825  
826  
827  
828  
829  
830  
831  
832  
833  
834  
835  
836  
837  
838  
839  
840  
841  
842  
843  
844  
845  
846  
847  
848  
849  
850  
851  
852  
853  
854  
855  
856  
857  
858  
859  
860  
861  
862  
863  
864  
865  
866  
867  
868  
869  
870  
871  
872  
873  
874  
875  
876  
877  
878  
879  
880  
881  
882  
883  
884  
885  
886  
887  
888  
889  
890  
891  
892  
893  
894  
895  
896  
897  
898  
899  
900  
901  
902  
903  
904  
905  
906  
907  
908  
909  
910  
911  
912  
913  
914  
915  
916  
917  
918  
919  
920  
921  
922  
923  
924  
925  
926  
927  
928  
929  
930  
931  
932  
933  
934  
935  
936  
937  
938  
939  
940  
941  
942  
943  
944  
945  
946  
947  
948  
949  
950  
951  
952  
953  
954  
955  
956  
957  
958  
959  
960  
961  
962  
963  
964  
965  
966  
967  
968  
969  
970  
971  
972  
973  
974  
975  
976  
977  
978  
979  
980  
981  
982  
983  
984  
985  
986  
987  
988  
989  
990  
991  
992  
993  
994  
995  
996  
997  
998  
999  
1000

39%. Three individuals were found to be ineligible (no diagnosis of GI cancer) and seven could not be contacted. To ensure variation in the sample purposive sampling of the 38 viable responses was employed considering age, sex, socio-economic status and level of PA. Twenty-seven individuals were selected for interview.

Participant demographics are described in Table 2. Just over half of the sample were male with an average age of 66.3 years, all were white British. The majority (89%) were married and owned their own home (93%), 56% were retired.

**Table 2: Demographic characteristics**

|                                                          |                    |
|----------------------------------------------------------|--------------------|
| <b>N = 27</b>                                            |                    |
| Male                                                     | 15 (56%)           |
| Age (mean/range)                                         | 66.3 years (41-79) |
| Cancer type                                              |                    |
| Colorectal                                               | 23 (85%)           |
| Oesophageal                                              | 3 (11%)            |
| Stomach                                                  | 1 (4%)             |
| Previous programme (N)                                   |                    |
| ASCOT                                                    | 15 (56%)           |
| ENCOURAGE                                                | 4 (15%)            |
| Active Everyday                                          | 2 (7%)             |
| Move More Northern Ireland                               | 6 (22%)            |
| Ethnicity                                                |                    |
| White European                                           | 27 (100%)          |
| Marital Status                                           |                    |
| Married                                                  | 24 (89%)           |
| Living with partner                                      | 1 (4%)             |
| Single                                                   | 1 (4%)             |
| Divorced/separated                                       | 1 (4%)             |
| Employment                                               |                    |
| Full time                                                | 5 (18.5%)          |
| Part time                                                | 5 (18.5%)          |
| Retired                                                  | 15 (56%)           |
| Volunteering                                             | 2 (7%)             |
| Accommodation                                            |                    |
| Owner occupied                                           | 25 (93%)           |
| Rented housing                                           | 2 (7%)             |
| Caring responsibilities for adult                        | 4 (15%)            |
| Education                                                |                    |
| More than secondary education, e.g. undergraduate degree | 12 (44%)           |

### 3.2 Thematic analysis results

Seven themes were identified, each is set out below with exemplar quotes presented in Table 3.

Disease processes:

Participants described the processes of disease, both cancer and comorbidities, and the role this played in relation to their PA participation.

*Disease limits activities.*

For some, late effects of cancer treatment inhibited engagement in certain activities. Limitations as a result of a stoma were described, for example, avoiding activities that involved bending, or swimming due to issues of body esteem and concerns about bag leakage. Some also experienced bowel urgency and described avoiding certain activities where toilet facilities were unavailable, as well as adapting activities due to concerns about leaks or accidents.

Other comorbidities/ill health impacted PA participation, including arthritic conditions and back problems. Chronic obstructive pulmonary disease, asthma and breathlessness were reported to restrict walking outside, particularly in cold weather. More acute periods of illness or injury were also described including cough/colds and muscle/joint strains which interrupted PA participation.

*PA to improve comorbidities/late effects of cancer.*

In contrast, PA was also described as essential in maintaining good health and well-being, avoiding illness and physical deterioration, and was a key motivating factor for ongoing participation.

Participants also recalled the role of PA in alleviating late effects of cancer treatment, for example,

**Table 3: Themes, sub-themes and accompanying quotes**

| Theme                                | Sub-theme                                          | Quote                                                                                                                                                                                                                                                                                                                                                                                                                                                                                                                                                                                                                                                                                                                                                                                                                                                                                                                      |
|--------------------------------------|----------------------------------------------------|----------------------------------------------------------------------------------------------------------------------------------------------------------------------------------------------------------------------------------------------------------------------------------------------------------------------------------------------------------------------------------------------------------------------------------------------------------------------------------------------------------------------------------------------------------------------------------------------------------------------------------------------------------------------------------------------------------------------------------------------------------------------------------------------------------------------------------------------------------------------------------------------------------------------------|
| Disease processes                    |                                                    |                                                                                                                                                                                                                                                                                                                                                                                                                                                                                                                                                                                                                                                                                                                                                                                                                                                                                                                            |
|                                      | Disease limits activities                          | <p><i>"I used to go swimming but, I don't want to go swimming now because, I don't want to be in changing rooms where I've suddenly got to change the bag and the bag's wet and all--- because, I have a--- a hernia -- I don't want to be wearing swimming costumes with a kind of lump there, you know, a bag lump and a body lump". Female, ASCOT</i></p> <p><i>I ought to get more active. I mean, me sister's offered me to. She said: "oh, yeah", you know: "I--- I go swimming every Tuesday, come with me". But, I can't think of anything more frightening than if I was taken short in a [swimming pool]... Female, Active Everyday</i></p> <p><i>I used to have a treadmill up to about six months ago and, I was on that most days. Every third day at least. But my balance isn't very good because I had a trapped spinal cord....I half regret getting rid of that... Female, Active Everyday</i></p>       |
|                                      | PA to improve comorbidities/late effects of cancer | <i>After I'd, you know, got into the--- the gym after the exercise very quickly, my condition was transformed beyond all recognition. You know, and that--- that was the motivation for keeping it up because I saw what it did for me and, I felt much better. My mobility was much improved and the pain levels had disappeared. I mean, I was on constant pain relief. I was taking Naproxen and Co-codamol. Both. Sort of three or four times a day. Once I'd started into a gym, I was taking none. Male, Move More</i>                                                                                                                                                                                                                                                                                                                                                                                               |
| The role of ageing                   |                                                    |                                                                                                                                                                                                                                                                                                                                                                                                                                                                                                                                                                                                                                                                                                                                                                                                                                                                                                                            |
|                                      | Age inhibiting PA                                  | <i>I still do me walks but, I don't do nothing like play any--- any sport or anything. (laughing) It's a bit much at sixty-nine, I think, you know. Male, ASCOT</i>                                                                                                                                                                                                                                                                                                                                                                                                                                                                                                                                                                                                                                                                                                                                                        |
|                                      | PA to combat ageing                                | <p><i>If you're fit and healthy obviously it helps, I should think. And, you're not--- you're not sitting around and becoming a burden to everyone else. So, this is obviously what we both want to avoid. So, yeah, that's--- that's probably the reason behind it [engaging in regular PA] and a fulfilling life, I suppose, and not being a--- a burden on anybody for as long as possible (laughing). Up to one-hundred-and-ten at least (laughter). Male, ASCOT</i></p> <p><i>When I look at my father-in-law he's--- he's--- muscle waste. He's got no strength anywhere. Obviously, arthritis doesn't help. But, I want to make sure I've got the fitness and ability to be able to do more than him when--- as I go--- go through my older ages. So, that's the one that really sort of kicked in with me and that's why I do cycling and I've got quite strong legs from the running as well. Male, ASCOT</i></p> |
| Emotion and psychological well-being |                                                    |                                                                                                                                                                                                                                                                                                                                                                                                                                                                                                                                                                                                                                                                                                                                                                                                                                                                                                                            |
|                                      | Psychological well-being                           | <p><i>"It takes--- you know, you're--- you're not thinking about that ache, that pain and what's going to happen in the future" Male, ENCOURAGE</i></p> <p><i>"But, you know, if--- I think, it's kind of--- it gives you a bit more power, doesn't it? --- your power's been taken away from you in that treatment time but--- and then you want it back. So, you think, so, I'm taking this back." Female, ASCOT</i></p>                                                                                                                                                                                                                                                                                                                                                                                                                                                                                                 |
|                                      | Low mood and motivation                            | <p><b>INT: So, going back to you using the exercise bike. Can you pinpoint what it was that stopped you doing that?</b></p> <p><b>RESP: ....I got to a stage and I'd think: "why am I bothering?". I think--- I'm getting to a bit of a--- down in the dumps stage. I think: "why am I bothering?". I'm seventy--- seventy-something. I'm seventy-six or whatever. And why should I bother? You know, because I've not got much longer to life. I think, I went through a stage like that. Female, ASCOT</b></p>                                                                                                                                                                                                                                                                                                                                                                                                           |

|                                     |                       |                                                                                                                                                                                                                                                                                                                                                                                                                                                                                                                                                                                                                                                                                                                                                                                                                                                                                                                                                                                                                                                   |
|-------------------------------------|-----------------------|---------------------------------------------------------------------------------------------------------------------------------------------------------------------------------------------------------------------------------------------------------------------------------------------------------------------------------------------------------------------------------------------------------------------------------------------------------------------------------------------------------------------------------------------------------------------------------------------------------------------------------------------------------------------------------------------------------------------------------------------------------------------------------------------------------------------------------------------------------------------------------------------------------------------------------------------------------------------------------------------------------------------------------------------------|
|                                     |                       | <i>You go for a walk around the block and once you've been around the block once, you're bored with it. So, then you drive out somewhere and have a walk around and then you run out of places to drive up to and you just can't be bothered. Male, ASCOT</i>                                                                                                                                                                                                                                                                                                                                                                                                                                                                                                                                                                                                                                                                                                                                                                                     |
| Incorporating PA into everyday life |                       |                                                                                                                                                                                                                                                                                                                                                                                                                                                                                                                                                                                                                                                                                                                                                                                                                                                                                                                                                                                                                                                   |
|                                     | Incidental activities | <i>I'm pretty active anyway. I mean, I don't--- I don't like sitting about too much. I always find something to do. Male, ASCOT</i>                                                                                                                                                                                                                                                                                                                                                                                                                                                                                                                                                                                                                                                                                                                                                                                                                                                                                                               |
|                                     | Planned activities    | <i>"Yeah. Yeah. They [Nordic walking sessions] were sacrosanct. You know, they're in the diary. They're--- well, we have a calendar on our desk and my walks are all written in there." Female, ENCOURAGE</i>                                                                                                                                                                                                                                                                                                                                                                                                                                                                                                                                                                                                                                                                                                                                                                                                                                     |
| Social interaction                  |                       |                                                                                                                                                                                                                                                                                                                                                                                                                                                                                                                                                                                                                                                                                                                                                                                                                                                                                                                                                                                                                                                   |
|                                     | Avoiding isolation    | <i>INT: And so, it sounds like you get down to that session on a Tuesday as often as you can. What is it about that that keeps you going back week after week?<br/>RESP: I think, it's--- it's the company. Like, as a--- as a pensioner now, I wouldn't--- I wouldn't have much contact with other people other than the family. But it's--- it's the contact. It's getting out and--- and meeting the people which would be the driving force behind it. And as well as that, I enjoy the exercises. Male, Move More</i>                                                                                                                                                                                                                                                                                                                                                                                                                                                                                                                        |
|                                     | Friendship            | <i>Let's put it this way. When we walk our mouths work just as hard as our legs (laughter) so. And--- and you--- so, you can--- you tend to--- you know, you walk in pairs usually just because on tracks it'll often--- that will be, you know, the--- determined by the woods of the track. So, walking two-by-two is the usual and--- and you switch around. You know, that's the nice thing. You'll--- you'll be in different groups and you just happen to link up with somebody and you'll--- you'll have a good old chat as you go along. So, that's the social side bit which is lovely. Female, ENCOURAGE.</i>                                                                                                                                                                                                                                                                                                                                                                                                                           |
| Support and self-monitoring.        |                       | <i>Practice nurses with my GP that--- those sort of people lectured me for years about doing a bit more physical activity but they're not offering me anything.<br/><br/>We (Active Everyday trainer) talked about whether or not--- you know, even when I was younger, I would have played any sport or done anything like that. We--- we had a general conversation and that's--- that as far as I know is a big part of their role. Is to fit people in with things that they feel you'd be capable of doing because if you weren't capable of doing it you're not going to stick at it. Female Move More<br/><br/><b>INT: And so, you talked about buying a Fitbit. How do you find that impacts on what you're doing?</b><br/><b>RESP: Well, it's great because--- you know, say I'd got to about mid-afternoon, we're not doing anything and I've only done five thousand steps, I know it's time for a walk. You know, that sort of thing. So, no, I use it as a guide and as a--- as a recorder really as well. Female, Move More</b></i> |
| Competing demands                   |                       | <i>And then--- then we had--- because my husband's an only child, my mother-in-law's got dementia and we were having to look after her and, you know, we had all the worry after--- and after she died, clearing the house. So, it's all sort of fell by the wayside, my exercise regime, really which is a shame. But, I was--- so, I would say for two years, I wasn't sort of doing what I had been doing before when the trial was on. But, I'm trying to gradually get back now. Female, ASCOT<br/><br/><i>So, me cycling, I do every Wednesday, Thursday and Friday and that would be cycling over to pick the grandchildren up. Take them home from school. Look after them for a little while. And then bring them--- then come home myself on my bike rather than jump in the car. Male, ASCOT</i></i>                                                                                                                                                                                                                                   |

1  
2  
3 exercising daily to improve gut mobility and bowel habit. PA was also reported as important to  
4  
5 manage other conditions such as Type II diabetes, avoiding weight gain/promoting weight loss and  
6  
7 alleviating joint stiffness caused by arthritic conditions. For one participant, engaging in regular PA  
8  
9 revolutionised the way he managed chronic back pain (see Table 3).  
10  
11  
12  
13  
14

#### 15 The role of ageing

16  
17 Factors related to ageing were frequently referenced in relation to PA participation.  
18  
19  
20  
21

#### 22 *Ageing perceived as inhibiting PA.*

23  
24 In some cases, advancing age was cited as a barrier to engaging in PA. Modification to activities were  
25  
26 described such as using the bus rather than walking, as well as a process of 'slowing down', which in  
27  
28 some cases was associated with retirement. Some perceived that more structured exercise was not  
29  
30 appropriate for older adults.  
31  
32  
33  
34

#### 35 *PA to combat consequences of ageing.*

36  
37 In contrast participation in PA was also reported to be important to preserve fitness and mobility  
38  
39 and slow the physical decline associated with ageing. It was felt that regular exercise helped to  
40  
41 ensure a future where the individual can engage in activities they enjoy and honour commitments to  
42  
43 family and loved ones for as long as possible. Maintaining independence and avoiding burdening  
44  
45 others was also important to some participants. Comparisons were also made to older relatives who  
46  
47 they had witnessed decline in health and a desire to avoid such reductions in mobility and  
48  
49 independence were expressed.  
50  
51  
52  
53  
54  
55

#### 56 Emotion and psychological well-being

57  
58  
59  
60

1  
2  
3 The association between PA and psychological well-being and emotion was commonly described, both  
4  
5 in a facilitative and deleterious way.  
6  
7  
8  
9

10 *Psychological well-being.*

11  
12 Participants who engaged regularly in PA frequently described enjoying the activities as well as  
13  
14 feeling a positive impact on psychological well-being. In some instances, PA also acted as a  
15  
16 distraction from concerns about their health and alleviated anxieties. Others spoke of feeling  
17  
18 empowered by taking exercise, using it as a vehicle to take control over their health following their  
19  
20 cancer diagnosis and treatment.  
21  
22  
23  
24  
25

26 *Low mood, low motivation and lack of enjoyment.*

27  
28  
29 For others feelings of low mood accompanied apathy and impacted on motivation leading to a  
30  
31 reduction in activity levels. Boredom was also expressed with some participants struggling to find  
32  
33 ways to increase their activity level in a manner that interested them and they enjoyed.  
34  
35  
36  
37  
38

39 *Incorporating PA into everyday life*

40  
41 Participants described a variety of ways in which they incorporated PA into their lives.  
42  
43

44 *Incidental activities.*

45  
46  
47 Typically, individuals who participated in little or no structured exercise described a desire to avoid  
48  
49 long periods of sitting. Participants recalled engaging in incidental activities such as domestic chores  
50  
51 and gardening as a means of staying active.  
52  
53

54 *Planned activities.*

55  
56  
57 For some, engagement was structured, organised and part of their routine, such as attending regular  
58  
59 exercise classes or active commuting. Participants expressed commitment to these activities and for  
60



1  
2  
3 some engagement was a priority. Others describe periods of increased PA engagement, for example  
4 during the PA programme or prompted by other factors such as a desire to lose weight, which  
5  
6 subsequently reduced or stopped. Some participants describe how they re-engaged in activities  
7  
8 weeks, months or even years later.  
9  
10  
11  
12  
13  
14

#### 15 Social interaction

16  
17  
18 Engagement in PA provided an important opportunity to socialise.  
19

#### 20 *Avoiding isolation.*

21  
22  
23 For some individuals living alone and/or who were retired, attending exercise classes provided an  
24  
25 opportunity to meet with others and socialise, reducing feelings of isolation.  
26  
27

28  
29 *Friendship:* Others talked about how participation in PA presented opportunities to develop  
30  
31 meaningful and long-lasting friendships with those they exercised with. For those participants  
32  
33 engaging in regular PA was an opportunity to spend time with friends and acted as a motivation to  
34  
35 continued engagement.  
36  
37  
38  
39  
40  
41

#### 42 Support and self-monitoring

43  
44  
45 For some participants continued engagement in PA was facilitated by personalised support. This was  
46  
47 described by individuals who had previously engaged in regular exercise prior to cancer diagnosis, as  
48  
49 well as those who were novices. The one-to-one specialised support provided during involvement in  
50  
51 a PA promotion programme helped individuals find activities they enjoyed and were appropriate for  
52  
53 them, enabling continued participation. For example, one participant described how a practice nurse  
54  
55 'lectured' her about taking more exercise with little effect. However, following a consultation with  
56  
57  
58  
59  
60

1  
2  
3 the Active Everyday practitioner, she was able to find an activity that suited her needs, and which  
4  
5 she had engaged in weekly for more than 2 years. See Table 3 for quotes.  
6  
7  
8  
9

10 Self-monitoring techniques were important for some. The use of technology to monitor activity,  
11  
12 particularly steps per day, was described as useful. Participants in the ASCOT trial were asked to  
13  
14 wear a pedometer at the beginning of the study. Some reported that they were surprised at how  
15  
16 few steps there were doing at baseline, and this provided motivation for change. Some continued to  
17  
18 use a device to measure their steps, setting a goal, such as walking 10,000 steps a day and regularly  
19  
20 self-monitoring their behaviour.  
21  
22

23  
24 Further, despite ensuring no advice/recommendations to increase activity were made during the  
25  
26 interviews some described their participation in the current study as acting as a prompt to consider  
27  
28 re-engaging with PA.  
29  
30  
31  
32

### 33 Competing demands

34  
35 Responsibilities such as caring for family members, family commitments and work schedules made  
36  
37 consistent and continued engagement in PA challenging for some. Others were able to use these  
38  
39 commitments as an opportunity to increase their activity levels. For example, playing with  
40  
41 grandchildren and active commuting.  
42  
43  
44  
45

### 46 Typology

47  
48  
49 From these findings describing experiences, barriers and facilitators to long-term PA engagement it  
50  
51 was possible to generate a typology consisting of three multidimensional types “maintained PA”,  
52  
53 “intermittent PA” and “low activity”. This typology, informed by the themes identified, characterises  
54  
55 the varied experiences of our sample helping to expand our understanding of factors that influence  
56  
57  
58  
59  
60

1  
2  
3 an individual's success, or not, of incorporating regular PA into their everyday lives (see Table 4 for  
4 characteristics by type and accompanying vignettes).  
5  
6  
7

8 The first type is "*Maintained PA*" (see Figure 1.1). Participants described themselves as routinely  
9 active, most often engaging in structured moderate and/or vigorous PA at regular times/days.  
10 Examples include attending the gym, Nordic walking and group exercise classes. Some had  
11 participated in regular PA at other periods of life and the PA intervention supported them to re-  
12 engage with these activities. Others established new routines following participation. The defining  
13 features of this group include finding enjoyment and pleasure in regular PA which is planned and  
14 prioritised. Physical and psychological benefits of regular PA in preserving health, mobility and  
15 independence were described and highly valued. Interruptions to activity tended to be brief and  
16 resuming activity was not problematic or effortful. PA as a means of socialisation was important for  
17 some but not all in this type.  
18  
19  
20  
21  
22  
23  
24  
25  
26  
27  
28  
29

30  
31 The second type is "*Intermittent PA*" (see Figure 1.2). Participants in this type described irregular  
32 engagement in structured PA, often resulting in cycles of action and inaction. For example, starting  
33 an exercise class or purchasing new exercise equipment, participating regularly for a period of time  
34 and then subsequently experiencing an interruption to that behaviour. Typically, these participants  
35 discussed the known benefits of exercise and described taking part because 'they should', often  
36 expressing extrinsically driven motivations such as a desire to lose weight. Reasons for interruptions  
37 to PA participation varied and included intrinsic factors, for example, boredom or low mood and  
38 extrinsic factors, such as a stressful event, ill health or caring responsibilities. Once these barriers  
39 were no longer relevant participants often found it difficult to re-engage due to a lack of  
40 motivation/apathy. This group also described deriving less pleasure and intrinsic reward from  
41 engaging in PA than those in the maintained PA type.  
42  
43  
44  
45  
46  
47  
48  
49  
50  
51  
52  
53  
54

55  
56 The third and final type described is "*Low activity*" (see Figure 1.3). Participants in this group take  
57 part in little or no structured PA but do describe avoiding long periods of sedentary time by engaging  
58  
59  
60

1  
2  
3 in activities of low intensity such as jobs around the home. Reference is also made to incidental  
4  
5 activities such as climbing stairs in the home which are felt to maintain mobility and fitness levels. As  
6  
7 with the maintained PA type, the importance of PA to maintain mobility was discussed with those in  
8  
9 the lower activity type feeling this was achieved with lower intensity activities such as walking and  
10  
11 household chores. Levels of PA participation were felt to be appropriate for their age and perceived  
12  
13 capability. Reference was also made to reductions in activity levels compared to earlier in the life.  
14  
15 Some are content with this and attribute it as a natural consequence of ageing. Others had to stop  
16  
17 or adapt activities less willingly as a result of comorbidities and/or consequences of cancer  
18  
19 treatment. Comparisons were also made to others of a similar age with participants evaluating their  
20  
21 activity levels to be higher than their peers. Those in the low activity group describe being able to  
22  
23 carry out necessary activities of daily living and infrequently express a desire to engage in additional  
24  
25 PA. Demographic characteristics of individuals by type (see Table 4) show those in the low activity  
26  
27 group to be slightly older than those in the other types. There was variation in original intervention  
28  
29 participation across all 3 types.  
30  
31  
32  
33  
34  
35  
36  
37

#### 38 **4. DISCUSSION**

39  
40  
41 This study provides the first published insight into the experiences of sustaining long-term PA  
42  
43 behaviour change following participation in a PA promotion programme among people with  
44  
45 gastrointestinal cancer. Seven key themes were identified, presenting key factors that promote or  
46  
47 inhibit regular participation in PA; disease processes, impact of ageing, emotions and psychological  
48  
49 well-being, incorporating PA into everyday life, social interaction, competing demands support and  
50  
51 self-monitoring. Additionally, a novel typology was developed to include three types; maintained PA,  
52  
53 intermittent PA and low PA.  
54  
55

56  
57 Characteristics of the “maintained PA” type where participation in PA is regular and sustained, are  
58  
59 comparable to findings from a systematic review and meta-synthesis of the acceptability of PA  
60

1  
2  
3 interventions in older adults[18]. This review included evidence from studies of older adults ( $\geq 65$   
4 years old) from non-clinical populations. The authors described the importance of fun and  
5  
6 enjoyment as a motivator for engagement, as well as descriptions of functional and psychosocial  
7  
8 improvements, related to PA participation which increase perceived value of participation, and  
9  
10 consequently enacted behaviour. Devereux-Fitzgerald et al. include the two factors of 'enjoyment'  
11  
12 and 'value' as central to their analytic model describing PA behaviour as seen in the 'maintained PA'  
13  
14 type[15]. The enjoyment of social interaction (as well as of PA participation in and of itself) was also  
15  
16 a common theme in the published literature captured in this review and supported in part by the  
17  
18 current study. However, social support was not a universal facilitator of continued PA engagement.  
19  
20 Other reviews have challenged this assumption that social support is a key facilitator to engagement  
21  
22 in PA, reporting it to be important for some but not all[19-20].  
23  
24  
25  
26  
27

28 In one of the few qualitative studies investigating long-term PA behaviour in people LWBC,  
29  
30 Midtgaard et al.[21] interviewed individuals who had participated in the Copenhagen PACT study, a  
31  
32 12 month programme to promote PA after cancer. Those interviewed described the importance of  
33  
34 prioritising PA and planning ahead to ensure regular engagement. They also described exercise as a  
35  
36 prerequisite for 'feeling and staying well'. However, as others have argued[18], a focus solely on the  
37  
38 role of PA for long-term health is unlikely to encourage long-term participation of many older adults.  
39  
40 This argument is in keeping with the current study whereby the majority of participants describes  
41  
42 knowledge of the value of PA for health but do not necessarily participate regularly.  
43  
44  
45  
46  
47  
48  
49  
50  
51  
52  
53  
54  
55  
56  
57  
58  
59  
60

1  
2  
3  
4  
5  
6  
7  
8  
9  
10  
11  
12  
13  
14  
15  
16  
17  
18  
19  
20  
21  
22  
23  
24  
25  
26  
27  
28  
29  
30  
31  
32  
33  
34  
35  
36  
37  
38  
39  
40  
41  
42  
43  
44  
45  
46

**Table 4 Participant characteristics by type.**

| Type                     | Age                | Sex             | Retired % (n) | More than secondary education | Vignette                                                                                                                                                                                                                                                                                                                                                                                                                                                                                                                                                                                                                                                                                                                                                                                                                                                                                                                                                                                                                                                                                                                                                                          |
|--------------------------|--------------------|-----------------|---------------|-------------------------------|-----------------------------------------------------------------------------------------------------------------------------------------------------------------------------------------------------------------------------------------------------------------------------------------------------------------------------------------------------------------------------------------------------------------------------------------------------------------------------------------------------------------------------------------------------------------------------------------------------------------------------------------------------------------------------------------------------------------------------------------------------------------------------------------------------------------------------------------------------------------------------------------------------------------------------------------------------------------------------------------------------------------------------------------------------------------------------------------------------------------------------------------------------------------------------------|
| Maintained PA<br>N = 13  | 41-79<br>Mean 65.4 | F = 43% (n = 6) | 57% (8)       | 35% (n = 5)                   | <p>Prior to cancer diagnosis Jean enjoyed regular participation in Nordic walking. She has enjoyed sport/physical activity throughout life but participated less during working life. She describes a sense of calm leading into her operation as she felt she had done all she could to optimise her health through the ENCOURAGE trial. She talks with passion of the importance of continued regular exercise for her health, wanting to be fit enough to enjoy life with her family and grandchildren and champions others to be active, as well as regular exercise giving her a sense of physical and mental wellbeing.</p> <p>Jean talks about having more time to prioritise exercise in her retirement and states that exercise is at the top of her to-do list each week. Exercise sessions are scheduled into her diary in advance each week and are frequently prioritised over other activities.</p> <p>Jean talks about a love of the outdoors and being active with a particular passion for Nordic walking.</p> <p>Jean walks regularly with a group and enjoys the social element with lasting friendships with other group members. Female, ENCOURAGE trial</p> |
| Intermittent PA<br>N = 5 | 60-76<br>Mean 65.8 | F = 40% (n = 3) | 20% (1)       | 60% (n=3)                     | <p>Sue talks about the importance of physical activity to maintain health and describes its importance due to being overweight and experiencing a myocardial infarction.</p> <p>Sue describes periods where she exercised regularly but is currently inactive and says 'I know I should do more'.</p> <p>Following completion of cardiac rehabilitation Sue purchased a stationary exercise bike, the intention was to use it every day which she reports doing for a few weeks before stopping.</p> <p>Sue describes a lack of enjoyment and little change in weight after using her stationary bike. She describes having low mood and a lack of motivation to continue.</p>                                                                                                                                                                                                                                                                                                                                                                                                                                                                                                    |

|                       |                    |                 |         |           |                                                                                                                                                                                                                                                                                                                                                                                                                                                                                                                                                                                                                                                   |
|-----------------------|--------------------|-----------------|---------|-----------|---------------------------------------------------------------------------------------------------------------------------------------------------------------------------------------------------------------------------------------------------------------------------------------------------------------------------------------------------------------------------------------------------------------------------------------------------------------------------------------------------------------------------------------------------------------------------------------------------------------------------------------------------|
|                       |                    |                 |         |           | Sue also talks about regaining weight she had lost which makes walking and exercising uncomfortable, also reducing her motivation to exercise. Female, ASCOT trial                                                                                                                                                                                                                                                                                                                                                                                                                                                                                |
| Low Activity<br>N = 8 | 61-76<br>Mean 68.4 | F = 50% (n = 4) | 75% (6) | 50% (n=4) | Roy describes the presence of a stoma bag 'slowing him down' and engaging in less activity since his retirement<br>He describes actively seeking opportunities to avoid long periods of sitting and undertakes tasks in and around the home.<br>Roy perceives himself to be sufficiently active compared to others of a similar age.<br>Roy talks about walking to get the paper each day but feels more structured exercise is not appropriate for his age.<br>He also talks about enjoying being able to help family members but completing jobs around the house and does not desire to increase activity levels further.<br>Male, ASCOT trial |

For peer review only

1  
2  
3  
4  
5  
6  
7  
8  
9  
10  
11  
12  
13  
14  
15  
16  
17  
18  
19  
20  
21  
22  
23  
24  
25  
26  
27  
28  
29  
30  
31  
32  
33  
34  
35  
36  
37  
38  
39  
40  
41  
42  
43  
44  
45  
46

1  
2  
3 Barriers identified in this study are consistent with those reported in the existing literature. A recent  
4 review of barriers and facilitators to exercise in people LWBC by cancer highlighted health problems,  
5 work and home responsibilities and lack of motivation as key barriers to engagement[11]. Others  
6 describe the deleterious effect of older age, physical decline and lack of time[19,22]. Although most  
7 studies in these reviews focused on adoption of PA rather than maintenance, the few studies that do  
8 consider long-term behaviour revealed similar obstacles. Brunet et al.[23] interviewed women with a  
9 previous diagnosis of breast cancer regarding maintenance of self-directed PA following  
10 participation in an intervention. Physical barriers were common, including arthritis and long-term  
11 effects of cancer treatment, such as fatigue as well as a lack of motivation and work and caring  
12 responsibilities. Similarly, in a study exploring experiences of PA over 5 years since diagnosis,  
13 Hefferon et al.[24] reported lack of motivation and apathy as well as the deleterious effects of the  
14 ageing process and co-morbidities and practical barriers such as proximity to exercise facilities and  
15 competing priorities as prohibitive to regular long-term PA engagement.

16  
17  
18  
19  
20  
21  
22  
23  
24  
25  
26  
27  
28  
29  
30  
31  
32  
33 When considering the "intermittent PA" type with cycles of action and inaction, it is helpful to  
34 consider theories of motivation and behaviour change that may help to explain this phenomenon.  
35  
36  
37  
38  
39  
40  
41  
42  
43  
44  
45  
46  
47  
48  
49  
50  
51  
52  
53  
54  
55  
56  
57  
58  
59  
60  
Kwasnicka et al.[25] present a systematic review of behaviour theories with a focus on maintenance  
of behaviour change and identify five key themes of which self-regulation is one. They propose that  
individuals differ in their ability to self-regulate their behaviour and those with lower self-regulatory  
capacity may have weaker intention-behaviour relationships (pg 285). It is suggested that when a  
behaviour falls short of a relevant goal, for example an individual does not attend an exercise class  
as planned, the individual must then exert more cognitive effort to 'correct' this behaviour and bring  
about satisfaction of goal achievement, or they disengage with the goal. At this stage the new  
behaviour is effortful, requiring significant self-regulation. Kwasnicka et al.[25] describe self-  
regulation as a limited cognitive resource which can be depleted through things such as stress and  
illness, and our self-regulatory reserves fluctuate throughout life. Habit formation has been  
proposed as a strategy to support behaviour maintenance [26]. Habit is a process whereby a cue



1  
2  
3 triggers an impulse to act because a mental association has been learned between a cue and an  
4 action[27,28]. Habits can support maintenance of behaviour because they are controlled through an  
5  
6 associative reflexive system, as opposed to an information-processing system[29], meaning they  
7  
8 continue to guide behaviours even when self-regulatory resources are low. Habit formation  
9  
10 however can be a long process[30] and maintaining motivation for long enough to develop strong  
11  
12 habits can be challenging, therefore long-term behaviour change will only be achieved once the  
13  
14 behaviour is habitual, requiring less conscious control. These suggested mechanisms bear many  
15  
16 similarities to the narratives presented by those in the intermittent activity type. It is also proposed  
17  
18 that motives for sustained behaviour must bring about regular gratification and will be more  
19  
20 successful if they are intrinsic, such as the enjoyment described by those in the 'maintained MVPA'  
21  
22 type in this study.  
23  
24  
25  
26

27  
28 A number of the components of the 'low activity' type, characterised by engagement in little or no  
29  
30 structured PA, share similarities with evidence from a recent review by McGowan and colleagues  
31  
32 who conducted a systematic review and meta-synthesis of the acceptability of PA to older  
33  
34 adults[31]. They synthesised the evidence for community-dwelling older adults who had not been  
35  
36 involved in PA interventions and were therefore not necessarily active or willing to be active. They  
37  
38 describe how older adults in these studies interpreted PA as a 'by-product' of other activities and a  
39  
40 perception that more structured and purposeful PA wasn't necessary or appropriate for them.  
41  
42 Similar concepts were described in a review of factors influencing PA participation in people with a  
43  
44 diagnosis of lung cancer with 'usual activities' preferred over structured exercise[22].  
45  
46  
47  
48  
49  
50  
51

### 52 **Implications for practice and future research**

53

54  
55 Findings from this study have important implications for practice. In addition to providing novel data  
56  
57 of the experiences of maintenance of PA behaviour change in PLWB gastrointestinal cancer, generation  
58  
59 of the unique typology argues for targeted interventions to support long-term behaviour change  
60

1  
2  
3 rather than a 'one size fits all' approach. Participants from all four PA programmes were represented  
4  
5 in the three types described here demonstrating successful (or not) behaviour change was not  
6  
7 limited to one approach. Those who have a history of exercising and/or who find activities that bring  
8  
9 them pleasure and who hold strong values of the importance of PA will likely need minimal support  
10  
11 to sustain engagement. In contrast individuals who experience cycles of success and failure of  
12  
13 engagement need further support with self-regulatory process. More frequent contacts may help  
14  
15 them identify appropriate activities, develop action plans and problem solve when they face  
16  
17 challenges. However further research is needed to determine how best to support individuals to  
18  
19 self-regulate independently when they experience recurrent cycles of action and inaction in order to  
20  
21 prevent reliance on external support.  
22  
23  
24  
25

26 Raising awareness of the importance and relevance of PA that goes beyond participating in  
27  
28 incidental and daily activities is necessary in the low activity type. They may also require support to  
29  
30 alter their self-identity, to see participation in PA as an appropriate behaviour for them, which may  
31  
32 also be facilitated by alteration of social norms. They are likely to need further support to find  
33  
34 activities appropriate to their physical capabilities, considering comorbidities and long-term  
35  
36 consequences of cancer. True for all is the importance of finding activities that are meaningful and  
37  
38 enjoyable.  
39  
40  
41

42 A priority for future research is therefore to develop processes which can identify these key  
43  
44 characteristics and determine the most appropriate support. Lastly, the striking similarities between  
45  
46 themes presented here and those in the wider literature, particularly among clinical and non-clinical  
47  
48 populations of older adults, suggests conclusions and therefore recommendations may be  
49  
50 appropriate to other cancer types and non-cancer populations.  
51  
52  
53

#### 54 **Strengths and limitations**

55  
56  
57 Inclusion of a mixed sample consisting of men and women with variation in current activity levels  
58  
59 and age is a strength of this study. However, transferability is reduced by the absence of any non-  
60

1  
2  
3 white participants, and the vast majority were married or co-habiting and most owning their own  
4 home suggesting financial security and a lack of socio-economic diversity despite attempts to  
5 maximise this during sampling. Furthermore, only 7 participants were classified as the 'low activity'  
6 type and therefore, despite our sampling strategy, are underrepresented in this study.  
7  
8  
9

10  
11 It is also important to note that we present thematic descriptions of the data and higher-level  
12 conceptual models in the form of a typology. There are multiple causal mechanisms at play, often  
13 beyond the control of the individual which are not described in the typology presented here. Future  
14 work should look at mechanisms associated with these types and how these might inform the design  
15 of future PA promotion programmes. The authors also note that this typology sits within  
16 environmental and structural contexts which were not explored.  
17  
18  
19  
20  
21  
22  
23  
24  
25  
26  
27  
28  
29

### 30 **Conclusions**

31  
32 People LWBC experience numerous challenges to sustaining increases in PA. These include cancer  
33 specific consequences such as presence of a stoma and issues with bowel habit, however many are  
34 similar to those described among non-cancer populations. The novel typology presented here  
35 supports the need for stratified approaches to long-term support for PA behaviour change. This  
36 approach is in keeping with emerging models of cancer care which call for personalised approaches.  
37 Future research should explore whether tailoring of interventions using these typologies produces  
38 better maintenance of PA.  
39  
40  
41  
42  
43  
44  
45  
46  
47  
48  
49  
50

51  
52 **CONTRIBUTIONS:** CG made substantial contributions to the conception, design, acquisition of data,  
53 analysis and interpretation of data for this study. CG drafted the manuscript and approved the final  
54 versions. CF made substantial contributions to the conception and design of the study,  
55 interpretation of the data, provided critical intellectual content and approved the final version. CRM  
56  
57  
58  
59  
60

1  
2  
3 made substantial contributions to the conception, design of the study, analysis and interpretation of  
4 the data, provided critical intellectual content and approved the final version. TC made substantial  
5 contributions to the data analysis and interpretation, provided critical intellectual content and  
6 approved the final version. BMP made substantial contributions to the conception of the design of  
7 the study, provided critical intellectual content and approved the final version. MM made substantial  
8 contributions to interpretation of the data, provided critical intellectual content and approved the  
9 final version. PL made substantial contributions to the acquisition of data, provided critical  
10 intellectual content and approved the final version of the manuscript. KB made substantial  
11 contributions of interpretation of the data provided critical intellectual content and approved the  
12 final version. All authors agree to be accountable for all aspects of the work.

13  
14  
15  
16  
17  
18  
19  
20  
21  
22  
23  
24  
25  
26 **Acknowledgement:** We would like to acknowledge the work of colleagues who assisted in the  
27 identification of participants to this study including Samantha Leggett (ENCOURAGE trial), Liam  
28 Humphreys (Active Everyday), Nuala McVeigh, Kelly Irwin, Eimear Hagan and Diarmaid McAuley  
29 from Move More Northern Ireland. Finally we would like to thank the participants for their time and  
30 invaluable contribution.

31  
32  
33  
34  
35  
36  
37  
38 **FUNDING:** This study was funded by a National Institute for Health Research (NIHR), Post-doctoral  
39 fellowship. The publication presents the independent research funded by the NIHR. The views  
40 expressed are those of the authors and not necessarily those of the NHS, the NIHR or the  
41 Department of Health and Social Care.

42  
43  
44  
45  
46  
47  
48 **Data Availability Statement:** Deidentified data are held by the corresponding author and available  
49 upon reasonable request assuming all necessary ethical approvals are in place.

50  
51  
52  
53  
54  
55  
56  
57  
58  
59  
60  
**CONFLICT OF INTEREST:** None to declare

1  
2  
3  
4  
5  
6  
7  
8  
9  
10  
11  
12  
13  
14  
15  
16  
17  
18  
19  
20  
21  
22  
23  
24  
25  
26  
27  
28  
29  
30  
31  
32  
33  
34  
35  
36  
37  
38  
39  
40  
41  
42  
43  
44  
45  
46  
47  
48  
49  
50  
51  
52  
53  
54  
55  
56  
57  
58  
59  
60

For peer review only

1  
2  
3 **FIGURE LEGENDS**  
4

5 **Figure 1.1: Maintained PA**  
6

7  
8 **Figure 1.2: Intermittent PA**  
9

10 **Figure 1.3: Low activity**  
11  
12  
13  
14  
15  
16  
17  
18  
19  
20  
21  
22  
23  
24  
25  
26  
27  
28  
29  
30  
31  
32  
33  
34  
35  
36  
37  
38  
39  
40  
41  
42  
43  
44  
45  
46  
47  
48  
49  
50  
51  
52  
53  
54  
55  
56  
57  
58  
59  
60

For peer review only

## REFERENCES

1. Campbell KL, Winters-Stone KM, Wiskemann J, et al. Exercise Guidelines for Cancer Survivors: Consensus Statement from International Multidisciplinary Roundtable. *Med Sci Sports Exerc.* 2019;51(11):2375-90. doi: 10.1249/MSS.0000000000002116.
2. Force ICT. Achieving world-class cancer outcomes: A strategy for England 2015-2020. 2015.
3. Blair SN, Morris JN. Healthy Hearts-and the Universal Benefits of Being Physically Active: Physical Activity and Health. *Annals of Epidemiology.* 2009;19(4):253-6. doi:10.1016/j.annepidem.2009.01.019
4. Grimmett C, Wardle J, Steptoe A. Health behaviours in older cancer survivors in the English Longitudinal Study of Ageing. *Eur J Cancer.* 2009;45(12):2180-6. doi: 10.1016/j.ejca.2009.02.024 [published Online First: 26 May 2009].
5. Turner RR, Steed L, Quirk H, et al. Interventions for promoting habitual exercise in people living with and beyond cancer. *Cochrane Database of Syst Rev.* 2018 Sept 19;9:CD010192. doi: 10.1002/14651858.CD010192.pub3
6. Roberts AL, Fisher A, Smith L, et al. Digital health behaviour change interventions targeting physical activity and diet in cancer survivors: a systematic review and meta-analysis. *J of Cancer Surviv.* 2017;11(6):704-719.. doi: 10.1007/s11764-017-0632-1. [published Online first: 4 Aug 2017].
7. Pinto B, Stein K, Dunsiger S. Peer mentorship to promote physical activity among cancer survivors: effects on quality of life. *Psychooncology.* 2015;24(10):1295-302. doi:10.1016/j.ejon.2017.06.006 [published Online First 10 Jul 2017].
8. Grimmett C, Corbett T, Brunet J, et al. Systematic review and meta-analysis of maintenance of physical activity behaviour change in cancer survivors. *Int J Behav Nutr Phys Act.* 2019;16(1):37. doi: 10.1186/s12966-019-0787-4.
9. Morey MC, Blair CK, Sloane, et al. Group trajectory analysis helps to identify older cancer survivors who benefit from distance-based lifestyle interventions. *Cancer.* 2015;121(24):4433-40. doi: 10.1002/cncr.29684. [published Online First: 29 Oct 2015].

- 1  
2  
3 10. Drury A, Payne S, Brady AM. Cancer survivorship: Advancing the concept in the context of  
4 colorectal cancer. *Enr J Oncol Nurs*. 2017;29:135-47. doi: 10.1016/j.ejon.2017.06.006. [published  
5 Online First: 10 Jul 2017].  
6  
7
- 8  
9 11. Clifford BK, Mizrahi D, Sandler, et al. Barriers and facilitators of exercise experienced by  
10 cancer survivors: a mixed methods systematic review. *Supportive Care Cancer*. 2018;26(3):685-700.  
11 doi: 10.1007/s00520-017-3964. [published Online First: 28 Nov 2017].  
12  
13
- 14 12. Lally P, Gardner B. Promoting habit formation. *Health Psychology Review*.  
15 2013;7(sup1):S137-S58. [doi.org/10.1080/17437199.2011.603640](https://doi.org/10.1080/17437199.2011.603640). [published Online First: 11 Oct  
16 2011].  
17  
18
- 19 13. Beeken RJ, Croker H, Heinrich M, et al. Study protocol for a randomised controlled trial of  
20 brief, habit-based, lifestyle advice for cancer survivors: exploring behavioural outcomes for the  
21 Advancing Survivorship Cancer Outcomes Trial (ASCOT). *BMJ Open*. 2016;6(11). doi:  
22 10.1136/bmjopen-2016-011646.  
23  
24
- 25 14. Humphreys L, Crank H, Frith G, et al.. Bright spots, physical activity investments that work:  
26 Active Everyday, Sheffield's physical activity service for all people living with and beyond cancer.  
27 *British Journal of Sports Medicine*. 2019;53(13):837-8. [published Online First: 14 June 2019].  
28  
29
- 30 15. Tong A, Sainsbury P, Craig J. Consolidated criteria for reporting qualitative research (COREQ):  
31 a 32-item checklist for interviews and focus groups. *International Journal for Quality in Health Care*.  
32 2007;19(6):349-57. [doi.org/10.1093/intqhc/mzm042](https://doi.org/10.1093/intqhc/mzm042). [published Online First: 14 Sept 2007].  
33  
34
- 35 16. Braun V, Clarke V. Using thematic analysis in psychology. *Qualitative Research in Psychology*.  
36 2006;3(2):77-101.  
37  
38
- 39 17. Kluge. Empirically Grounded Construction of Types and Typologies in Qualitative Social  
40 Reserach: Forum: Qualitative Social Research 2007 1 (1), Art. 14:[Available from: [http://nbn-](http://nbn-resolving.de/urn:nbn:de:0114-fqs0001145)  
41 [resolving.de/urn:nbn:de:0114-fqs0001145](http://nbn-resolving.de/urn:nbn:de:0114-fqs0001145)]. Accessed Jan 2020.  
42  
43  
44  
45  
46  
47  
48  
49  
50  
51  
52  
53  
54  
55  
56  
57  
58  
59  
60



- 1  
2  
3 18. Devereux-Fitzgerald A, Powell R, Dewhurst A, et al.. The acceptability of physical activity  
4 interventions to older adults: A systematic review and meta-synthesis. *Soc Sci & Med*. 2016;158:14-  
5  
6 23. doi: 10.1016/j.socscimed.2016.04.006. [published Online First: 10 Apr 2016].  
7  
8  
9  
10 19. Fox L, Wiseman T, Cahill D, et al. Barriers and facilitators to physical activity in men with  
11 prostate cancer: A qualitative and quantitative systematic review. *Psychooncology*.  
12  
13 2019;28(12):2270-85. doi: 10.1002/pon.5240. [published Online First: 6 Nov 2019].  
14  
15  
16 20. McDonough MH, Beselt LJ, Daun JT, et al. The role of social support in physical activity for  
17 cancer survivors: A systematic review. *Psychooncology*. 2019;28(10):1945-58. doi:  
18  
19 10.1002/pon.5171. [published Online First: 16 Aug 2019].  
20  
21  
22  
23 21. Midtgaard J, Rossell K, Christensen JF, et al. Demonstration and manifestation of self-  
24 determination and illness resistance-A qualitative study of long-term maintenance of physical  
25 activity in posttreatment cancer survivors. *Supportive Care Cancer*. 2012;20(9):1999-2008. doi:  
26  
27 10.1007/s00520-011-1304-8. [published Online First: 15 Nov 2011].  
28  
29  
30  
31  
32 22. Granger CL, Connolly B, Denehy L, et al. Understanding factors influencing physical activity  
33 and exercise in lung cancer: a systematic review. *Support Care Cancer*. 2017;25(3):983-99. doi:  
34  
35 10.1007/s00520-016-3484-8. [published Online First: 29 Nov 2016].  
36  
37  
38  
39 23. Brunet J, Taran S, Burke S, et al. A qualitative exploration of barriers and motivators to  
40 physical activity participation in women treated for breast cancer. *Disabil Rehabil*. 2013;35(24):2038-  
41  
42 45. doi: 10.3109/09638288.2013.802378. [published Online First: 17 Jun 2013].  
43  
44  
45  
46 24. Hefferon K, Murphy H, McLeod J, et al. Understanding barriers to exercise implementation  
47 5-year post-breast cancer diagnosis: a large-scale qualitative study. *Health Educ Res*. 2013;28(5):843-  
48  
49 56. doi: 10.1093/her/cyt083. [published Online First: 22 Aug 2013].  
50  
51  
52  
53 25. Kwasnicka D, Dombrowski SU, White M, et al. Theoretical explanations for maintenance of  
54 behaviour change: a systematic review of behaviour theories. *Health Psychology Review*.  
55  
56 2016;10(3):277-96. doi: 10.1080/17437199.2016.1151372. [published Online First: 7 Mar 2016].  
57  
58  
59  
60

- 1  
2  
3 26. Gardner, B., Rebar, A., Lally, P. Habit Interventions. In <.S. Hagger, L. D. Cameron, K.  
4 Hamilton, N. Hankonen & T. Lintunen (eds.), *The Handbook of Behavior Change* (pp.599-616\_. New  
5 York, NY: Cambridge University Press. <https://doi.org/10.1017/97811086773180.041>.  
6  
7  
8  
9  
10 27. Gardner B. A review and analysis of the use of 'habit' in understanding, predicting and  
11 influencing health-related behaviour. *Health Psychol Rev.* 2015;9(3):277-95. doi:  
12 10.1080/17437199.2013.876238. [published Online First: 21 jan 2014].  
13  
14  
15  
16 28. Wood W, R nnger D. Psychology of Habit. *Annu Rev Psychol.* 2016;67(1):289-314. doi:  
17 10.1146/annurev-psych-122414-033417. [published Online First: 10 Sept 2015].  
18  
19  
20  
21 29. Strack F, Deutsch R. Reflective and impulsive determinants of social behavior. *Pers Soc*  
22 *Psychol Rev.* 2004;8(3):220-47.  
23  
24  
25  
26 30. Lally P, van Jaarsveld CHM, Potts HWW, et al. How are habits formed: Modelling habit  
27 formation in the real world. *Eur J of Social Psych.* 2010;40(6):998-1009. Doi.org/10.1002/ejsp.674.  
28 [published Online First: 16 Jul 2009].  
29  
30  
31  
32 31. McGowan LJ, Devereux-Fitzgerald A, Powell R, et al.. How acceptable do older adults find the  
33 concept of being physically active? A systematic review and meta-synthesis. *Int Rev Sport Ex Psycho.*  
34 2018;11(1):1-24. [doi.org/10.1080/1750984X.2016.1272705](https://doi.org/10.1080/1750984X.2016.1272705). [published Online First: 16 Jan 2017].  
35  
36  
37  
38  
39  
40  
41  
42  
43  
44  
45  
46  
47  
48  
49  
50  
51  
52  
53  
54  
55  
56  
57  
58  
59  
60

Figure 1.1: Maintained PA

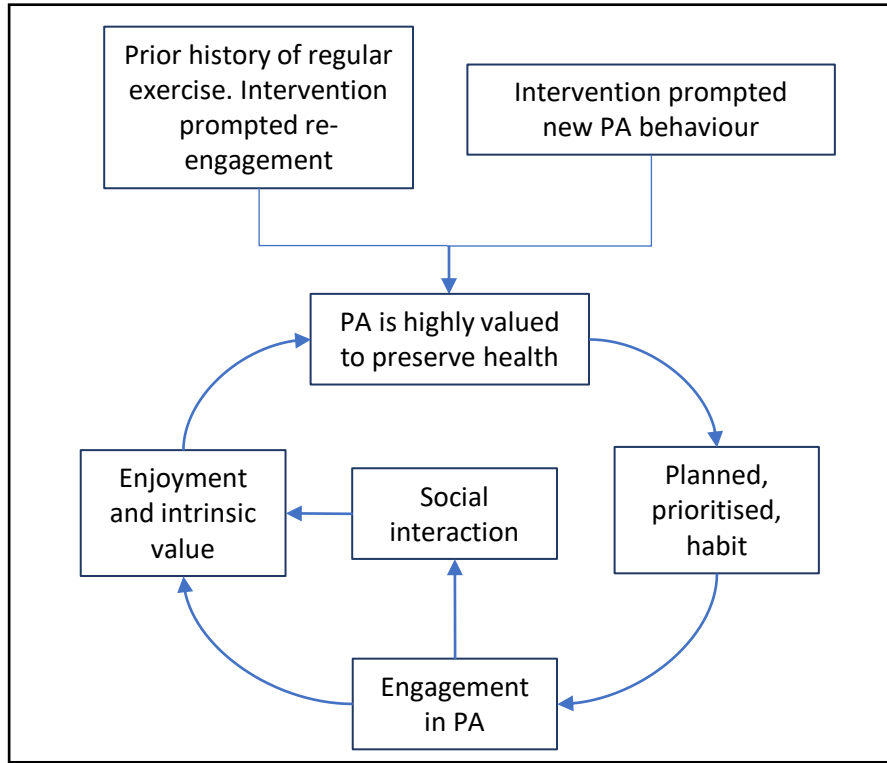

Figure 1.3: Low activity

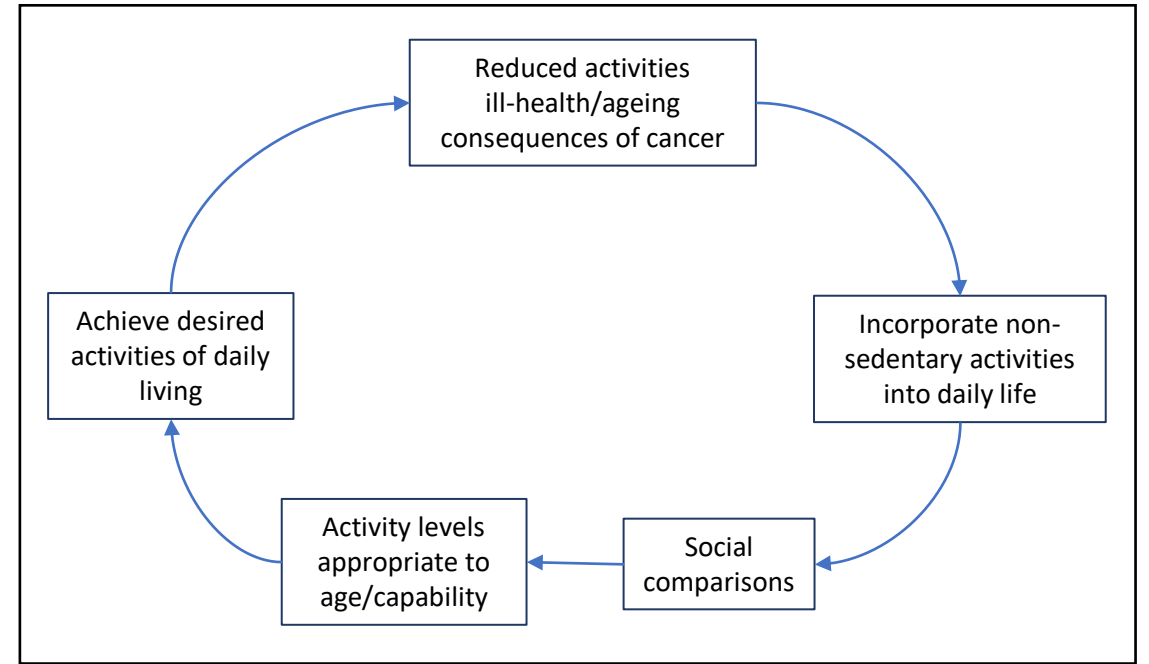

Figure 1.2: Intermittent PA

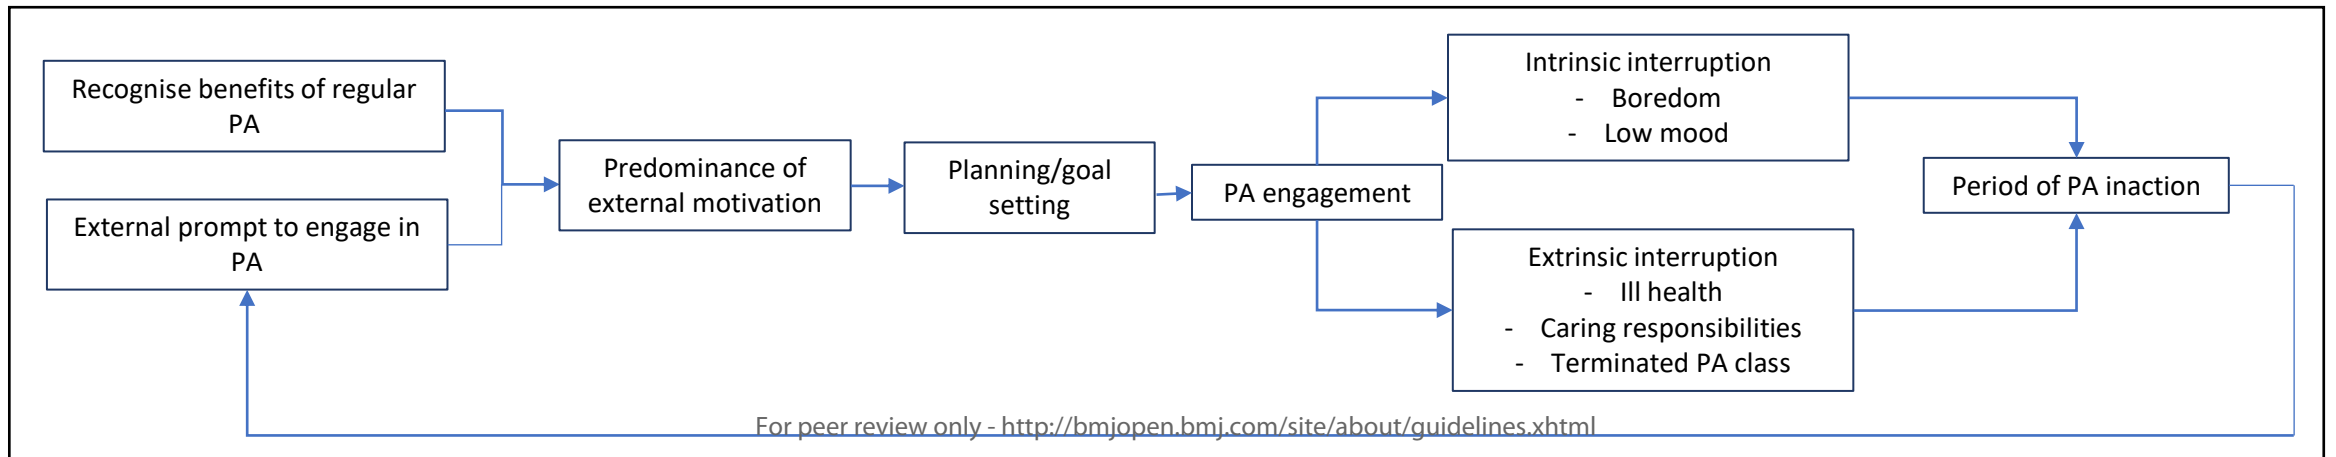

1  
2  
3  
4  
5  
6  
7  
8  
9  
10  
11  
12  
13  
14  
15  
16  
17  
18  
19  
20  
21  
22  
23  
24  
25  
26  
27  
28  
29  
30  
31  
32  
33  
34  
35  
36  
37  
38  
39  
40  
41

## COREQ (COnsolidated criteria for REporting Qualitative research) Checklist

A checklist of items that should be included in reports of qualitative research. You must report the page number in your manuscript where you consider each of the items listed in this checklist. If you have not included this information, either revise your manuscript accordingly before submitting or note N/A.

| Topic                                          | Item No. | Guide Questions/Description                                                                                                                              | Reported on Page No. |
|------------------------------------------------|----------|----------------------------------------------------------------------------------------------------------------------------------------------------------|----------------------|
| <b>Domain 1: Research team and reflexivity</b> |          |                                                                                                                                                          |                      |
| <i>Personal characteristics</i>                |          |                                                                                                                                                          |                      |
| Interviewer/facilitator                        | 1        | Which author/s conducted the interview or focus group?                                                                                                   |                      |
| Credentials                                    | 2        | What were the researcher's credentials? E.g. PhD, MD                                                                                                     |                      |
| Occupation                                     | 3        | What was their occupation at the time of the study?                                                                                                      |                      |
| Gender                                         | 4        | Was the researcher male or female?                                                                                                                       |                      |
| Experience and training                        | 5        | What experience or training did the researcher have?                                                                                                     |                      |
| <i>Relationship with participants</i>          |          |                                                                                                                                                          |                      |
| Relationship established                       | 6        | Was a relationship established prior to study commencement?                                                                                              |                      |
| Participant knowledge of the interviewer       | 7        | What did the participants know about the researcher? e.g. personal goals, reasons for doing the research                                                 |                      |
| Interviewer characteristics                    | 8        | What characteristics were reported about the interviewer/facilitator? e.g. Bias, assumptions, reasons and interests in the research topic                |                      |
| <b>Domain 2: Study design</b>                  |          |                                                                                                                                                          |                      |
| <i>Theoretical framework</i>                   |          |                                                                                                                                                          |                      |
| Methodological orientation and Theory          | 9        | What methodological orientation was stated to underpin the study? e.g. grounded theory, discourse analysis, ethnography, phenomenology, content analysis |                      |
| <i>Participant selection</i>                   |          |                                                                                                                                                          |                      |
| Sampling                                       | 10       | How were participants selected? e.g. purposive, convenience, consecutive, snowball                                                                       |                      |
| Method of approach                             | 11       | How were participants approached? e.g. face-to-face, telephone, mail, email                                                                              |                      |
| Sample size                                    | 12       | How many participants were in the study?                                                                                                                 |                      |
| Non-participation                              | 13       | How many people refused to participate or dropped out? Reasons?                                                                                          |                      |
| <i>Setting</i>                                 |          |                                                                                                                                                          |                      |
| Setting of data collection                     | 14       | Where was the data collected? e.g. home, clinic, workplace                                                                                               |                      |
| Presence of non-participants                   | 15       | Was anyone else present besides the participants and researchers?                                                                                        |                      |
| Description of sample                          | 16       | What are the important characteristics of the sample? e.g. demographic data, date                                                                        |                      |
| <i>Data collection</i>                         |          |                                                                                                                                                          |                      |
| Interview guide                                | 17       | Were questions, prompts, guides provided by the authors? Was it pilot tested?                                                                            |                      |
| Repeat interviews                              | 18       | Were repeat interviews carried out? If yes, how many?                                                                                                    |                      |
| Audio/visual recording                         | 19       | Did the research use audio or visual recording to collect the data?                                                                                      |                      |
| Field notes                                    | 20       | Were field notes made during and/or after the interview or focus group?                                                                                  |                      |
| Duration                                       | 21       | What was the duration of the interviews or focus group?                                                                                                  |                      |
| Data saturation                                | 22       | Was data saturation discussed?                                                                                                                           |                      |
| Transcripts returned                           | 23       | Were transcripts returned to participants for comment and/or                                                                                             |                      |

| Topic                                  | Item No. | Guide Questions/Description                                                                                                        | Reported on Page No. |
|----------------------------------------|----------|------------------------------------------------------------------------------------------------------------------------------------|----------------------|
|                                        |          | correction?                                                                                                                        |                      |
| <b>Domain 3: analysis and findings</b> |          |                                                                                                                                    |                      |
| <i>Data analysis</i>                   |          |                                                                                                                                    |                      |
| Number of data coders                  | 24       | How many data coders coded the data?                                                                                               |                      |
| Description of the coding tree         | 25       | Did authors provide a description of the coding tree?                                                                              |                      |
| Derivation of themes                   | 26       | Were themes identified in advance or derived from the data?                                                                        |                      |
| Software                               | 27       | What software, if applicable, was used to manage the data?                                                                         |                      |
| Participant checking                   | 28       | Did participants provide feedback on the findings?                                                                                 |                      |
| <i>Reporting</i>                       |          |                                                                                                                                    |                      |
| Quotations presented                   | 29       | Were participant quotations presented to illustrate the themes/findings?<br>Was each quotation identified? e.g. participant number |                      |
| Data and findings consistent           | 30       | Was there consistency between the data presented and the findings?                                                                 |                      |
| Clarity of major themes                | 31       | Were major themes clearly presented in the findings?                                                                               |                      |
| Clarity of minor themes                | 32       | Is there a description of diverse cases or discussion of minor themes?                                                             |                      |

Developed from: Tong A, Sainsbury P, Craig J. Consolidated criteria for reporting qualitative research (COREQ): a 32-item checklist for interviews and focus groups. *International Journal for Quality in Health Care*. 2007. Volume 19, Number 6: pp. 349 – 357

**Once you have completed this checklist, please save a copy and upload it as part of your submission. DO NOT include this checklist as part of the main manuscript document. It must be uploaded as a separate file.**

## Appendix A – Interview guide

- What did you do as part of the [name physical activity programme]?
- How did you incorporate this into your day to day life?
- How are things now in relation to your physical activity habits?
- For those who describe increased/regular physical activity engagement:
  - What has helped you to make these changes?
  - Have there been any challenges to you staying active?
  - Why have you made these changes?
  - Has anyone else helped you to stay active?
  - Did you have to make changes to other parts of your life to incorporate more physical activity?
  - How does your activity impact on you? Prompt - How does it make you feel? Does it affect any other areas of your life?
  - In what way is physical activity important to your everyday life?
- For those who describe no change in physical activity levels:
  - Would you like to be doing anything differently?
  - If yes – what are the main things that prevent you from being more active?
- For those who describe an initial increase but then a decline in physical activity levels:
  - Why do you think your activity levels reduced after the trial?
  - Would you like to be doing anything differently?
  - If yes – what are the main things that prevent you from doing so?
- How do your physical activity habits compare to times before your cancer diagnosis?
