# Supplementary material for: Exploring maintenance of physical activity behaviour change among people living with and beyond gastrointestinal cancer: a cross-sectional qualitative study and typology
Source: PubMed Central journal article supplement (PMC7597473; doi:10.1136/bmjopen-2020-037136), 2020-10-29
Supplement: bmjopen-2020-037136supp002.pdf [file bmjopen-2020-037136supp002.pdf]

## Appendix A – Interview guide

- What did you do as part of the [name physical activity programme]?
- How did you incorporate this into your day to day life?
- How are things now in relation to your physical activity habits?
- For those who describe increased/regular physical activity engagement:
  - What has helped you to make these changes?
  - Have there been any challenges to you staying active?
  - Why have you made these changes?
  - Has anyone else helped you to stay active?
  - Did you have to make changes to other parts of your life to incorporate more physical activity?
  - How does your activity impact on you? Prompt - How does it make you feel? Does it affect any other areas of your life?
  - In what way is physical activity important to your everyday life?
- For those who describe no change in physical activity levels:
  - Would you like to be doing anything differently?
  - If yes – what are the main things that prevent you from being more active?
- For those who describe an initial increase but then a decline in physical activity levels:
  - Why do you think your activity levels reduced after the trial?
  - Would you like to be doing anything differently?
  - If yes – what are the main things that prevent you from doing so?
- How do your physical activity habits compare to times before your cancer diagnosis?
